# Supplementary material for: In silico analysis of the grapefruit sRNAome, transcriptome and gene regulation in response to CTV-CDVd co-infection
Source: PubMed Central journal article supplement (PMC5651572; doi:10.1186/s12985-017-0871-9), 2017-10-23

Figure S1

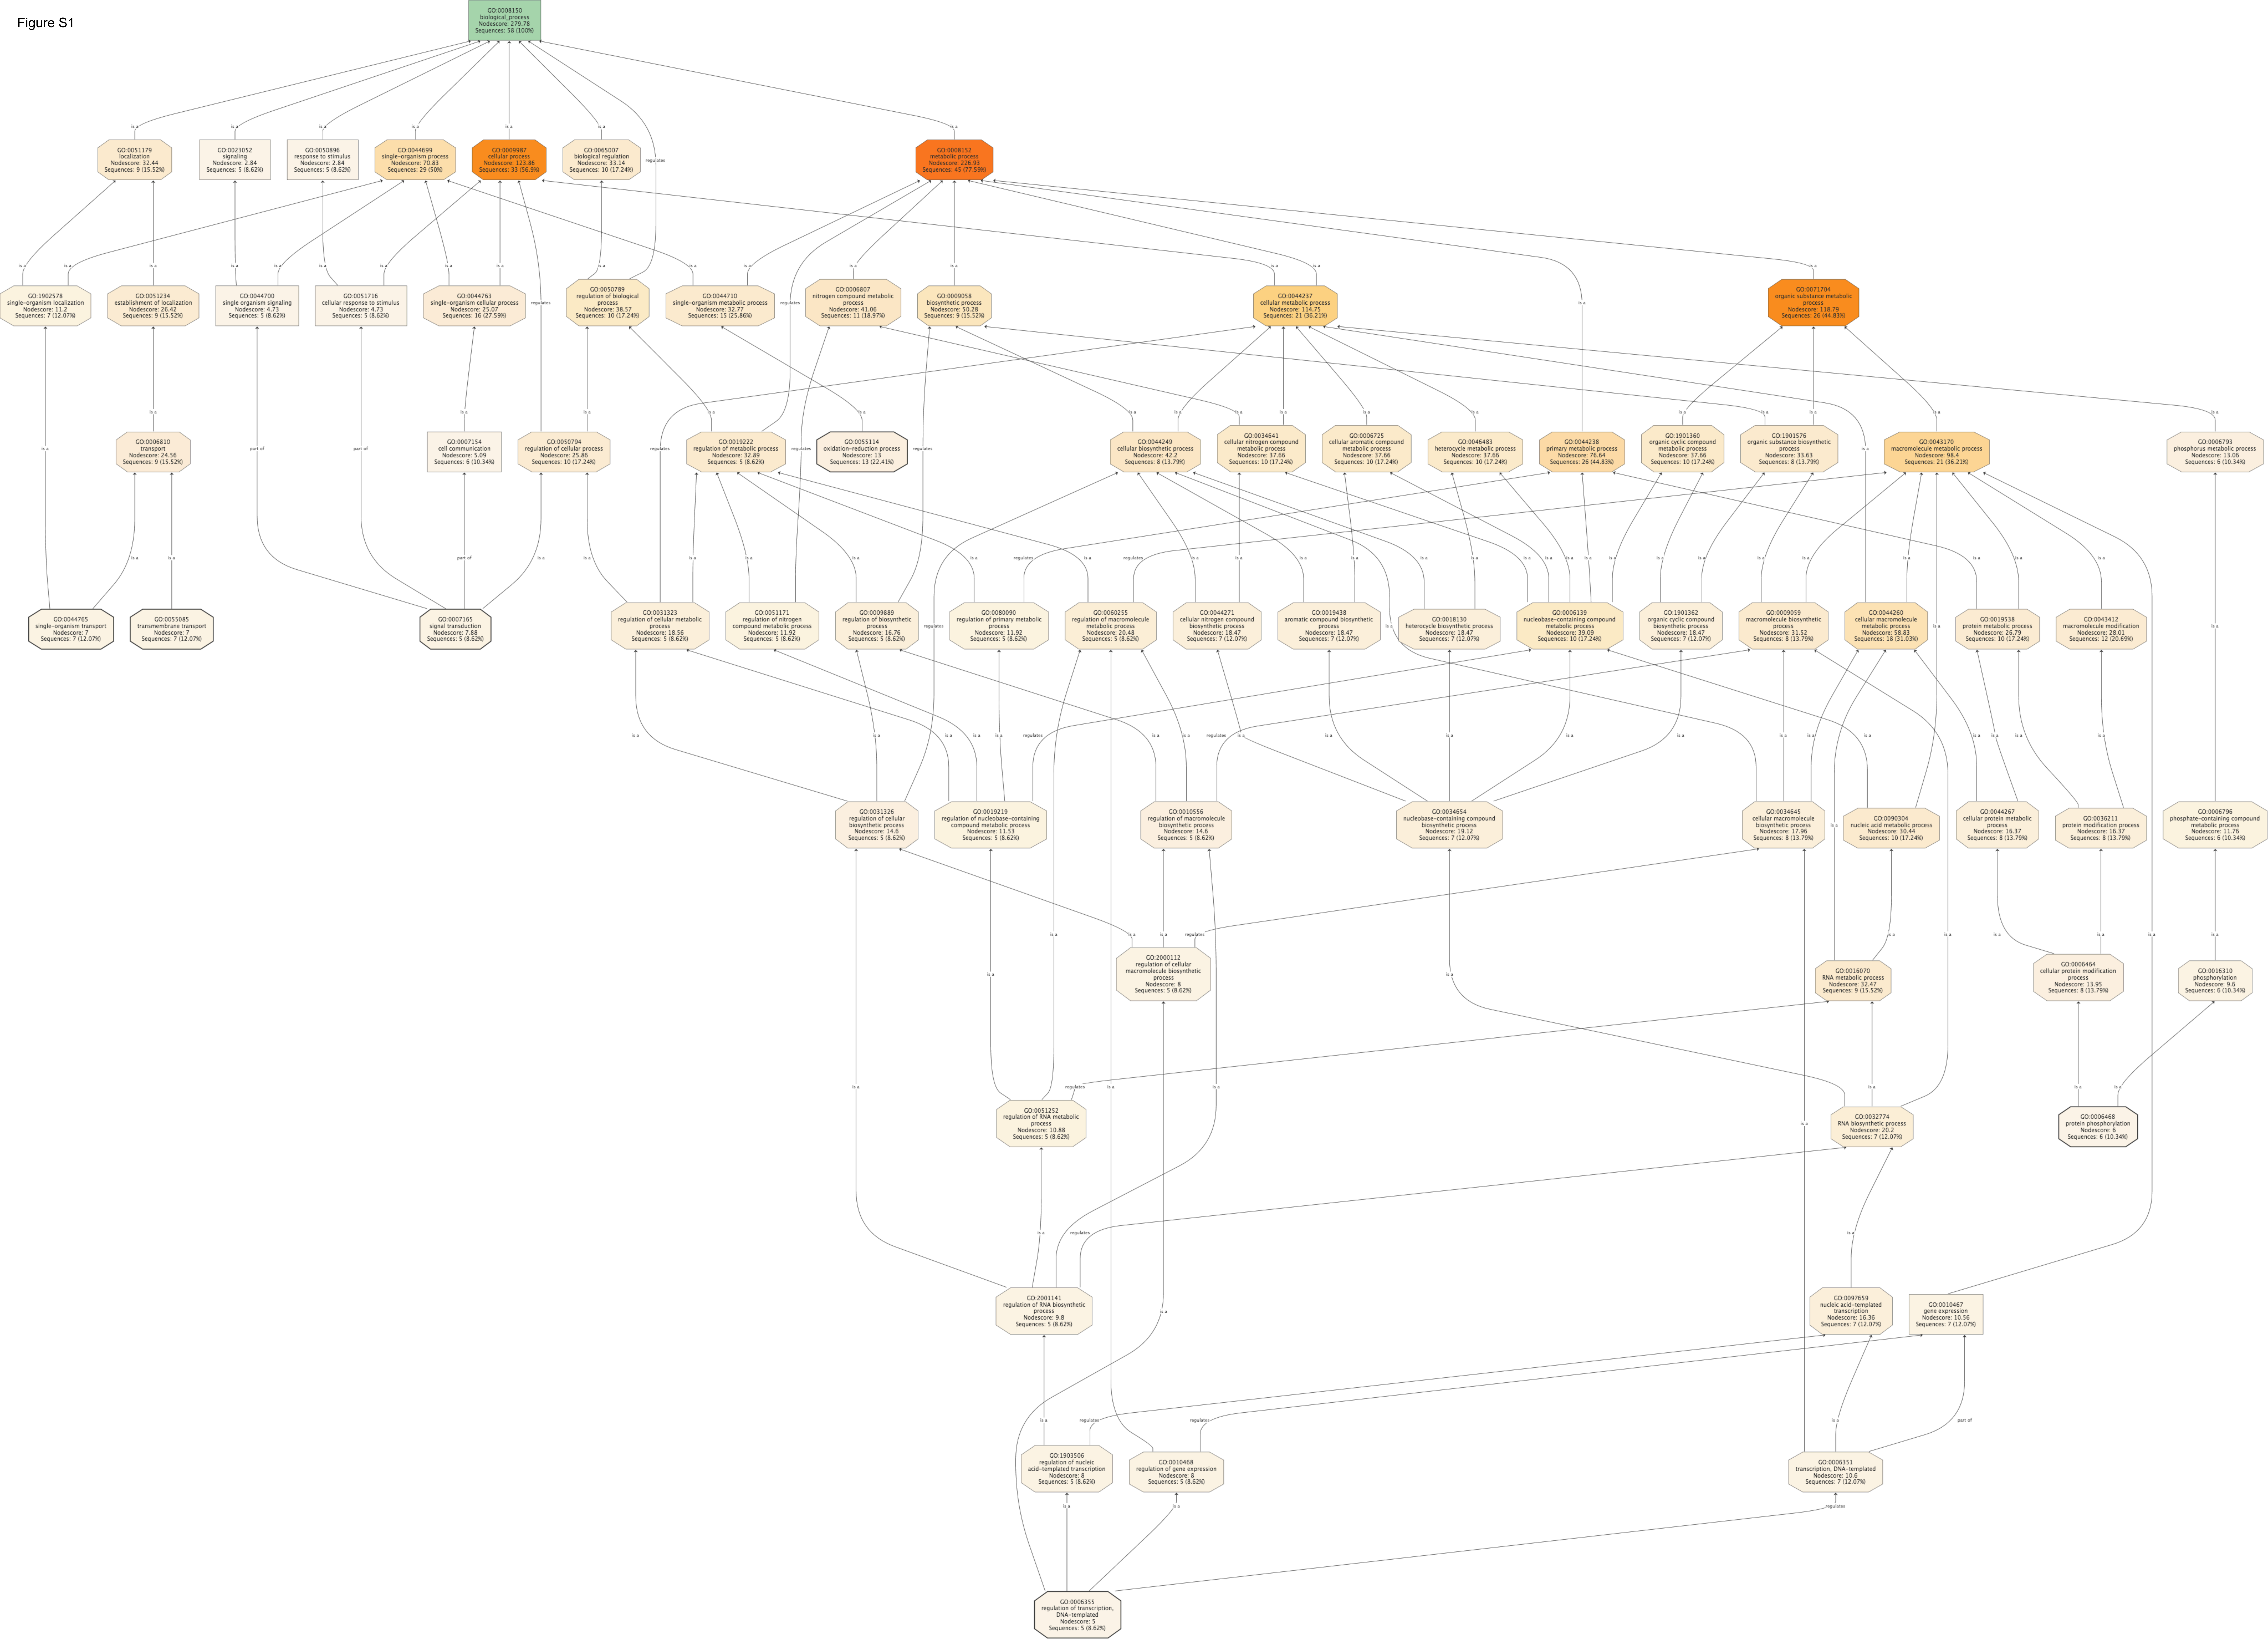

Figure S2

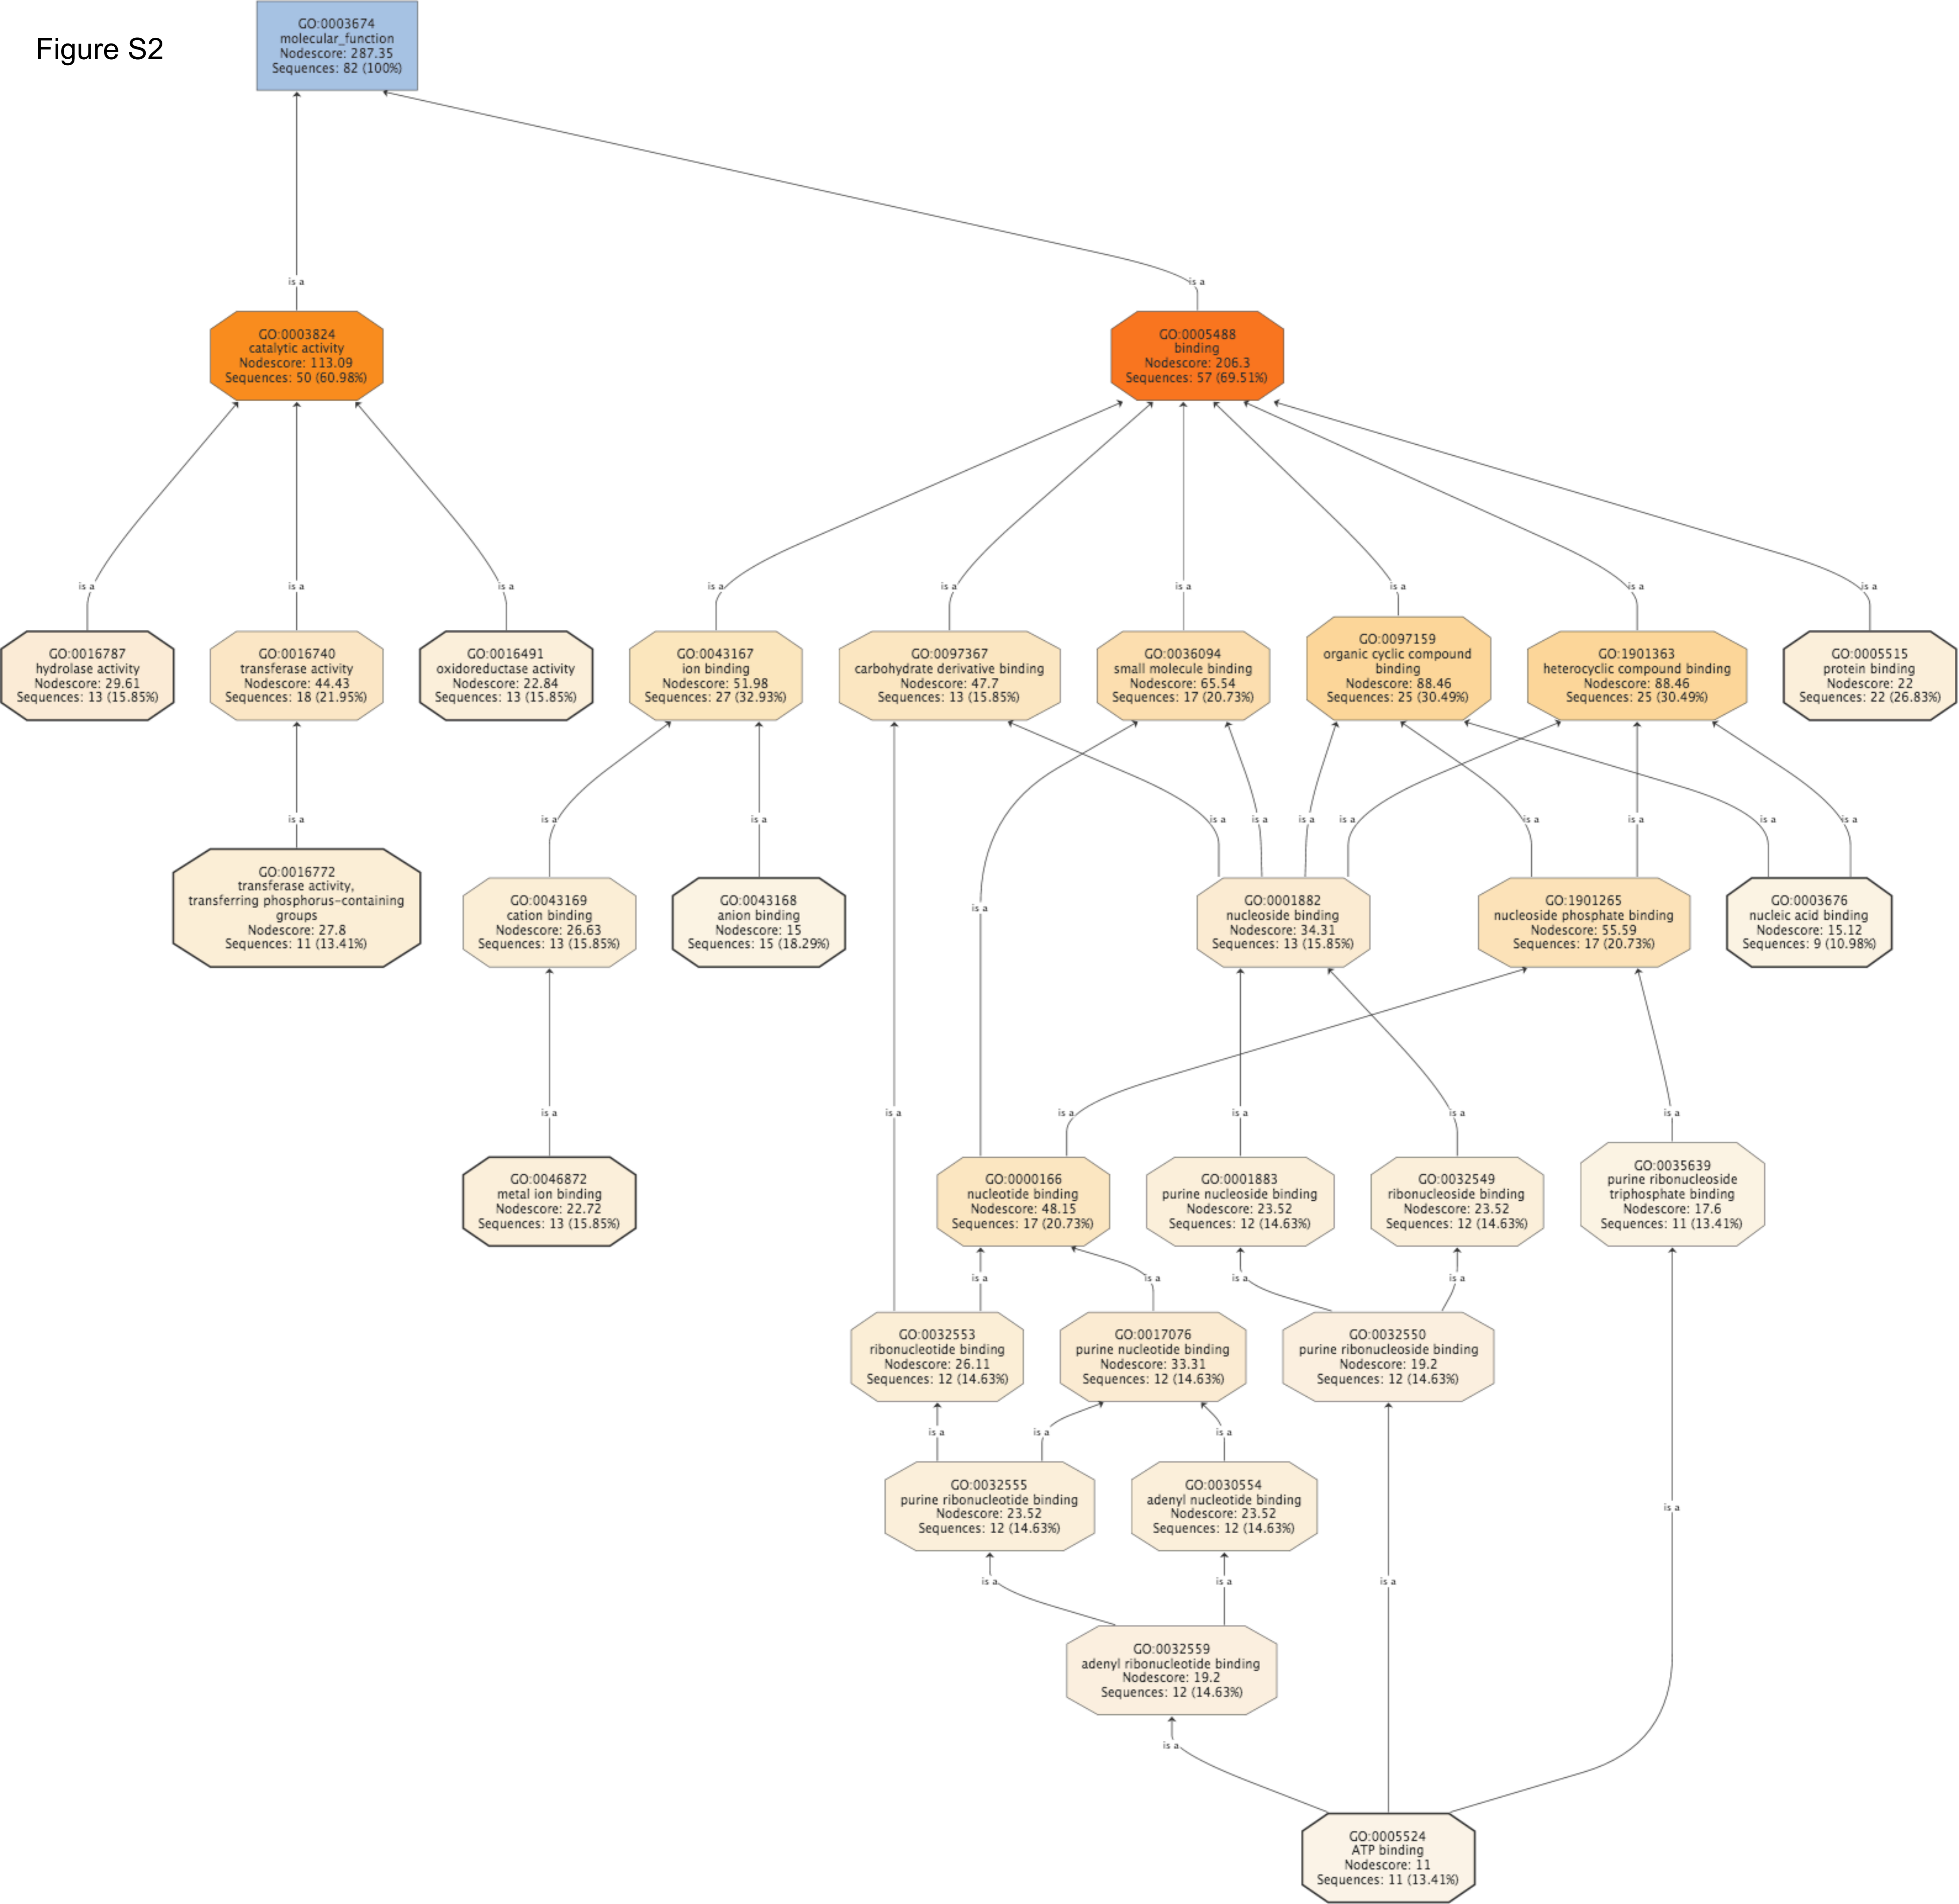

Figure S3

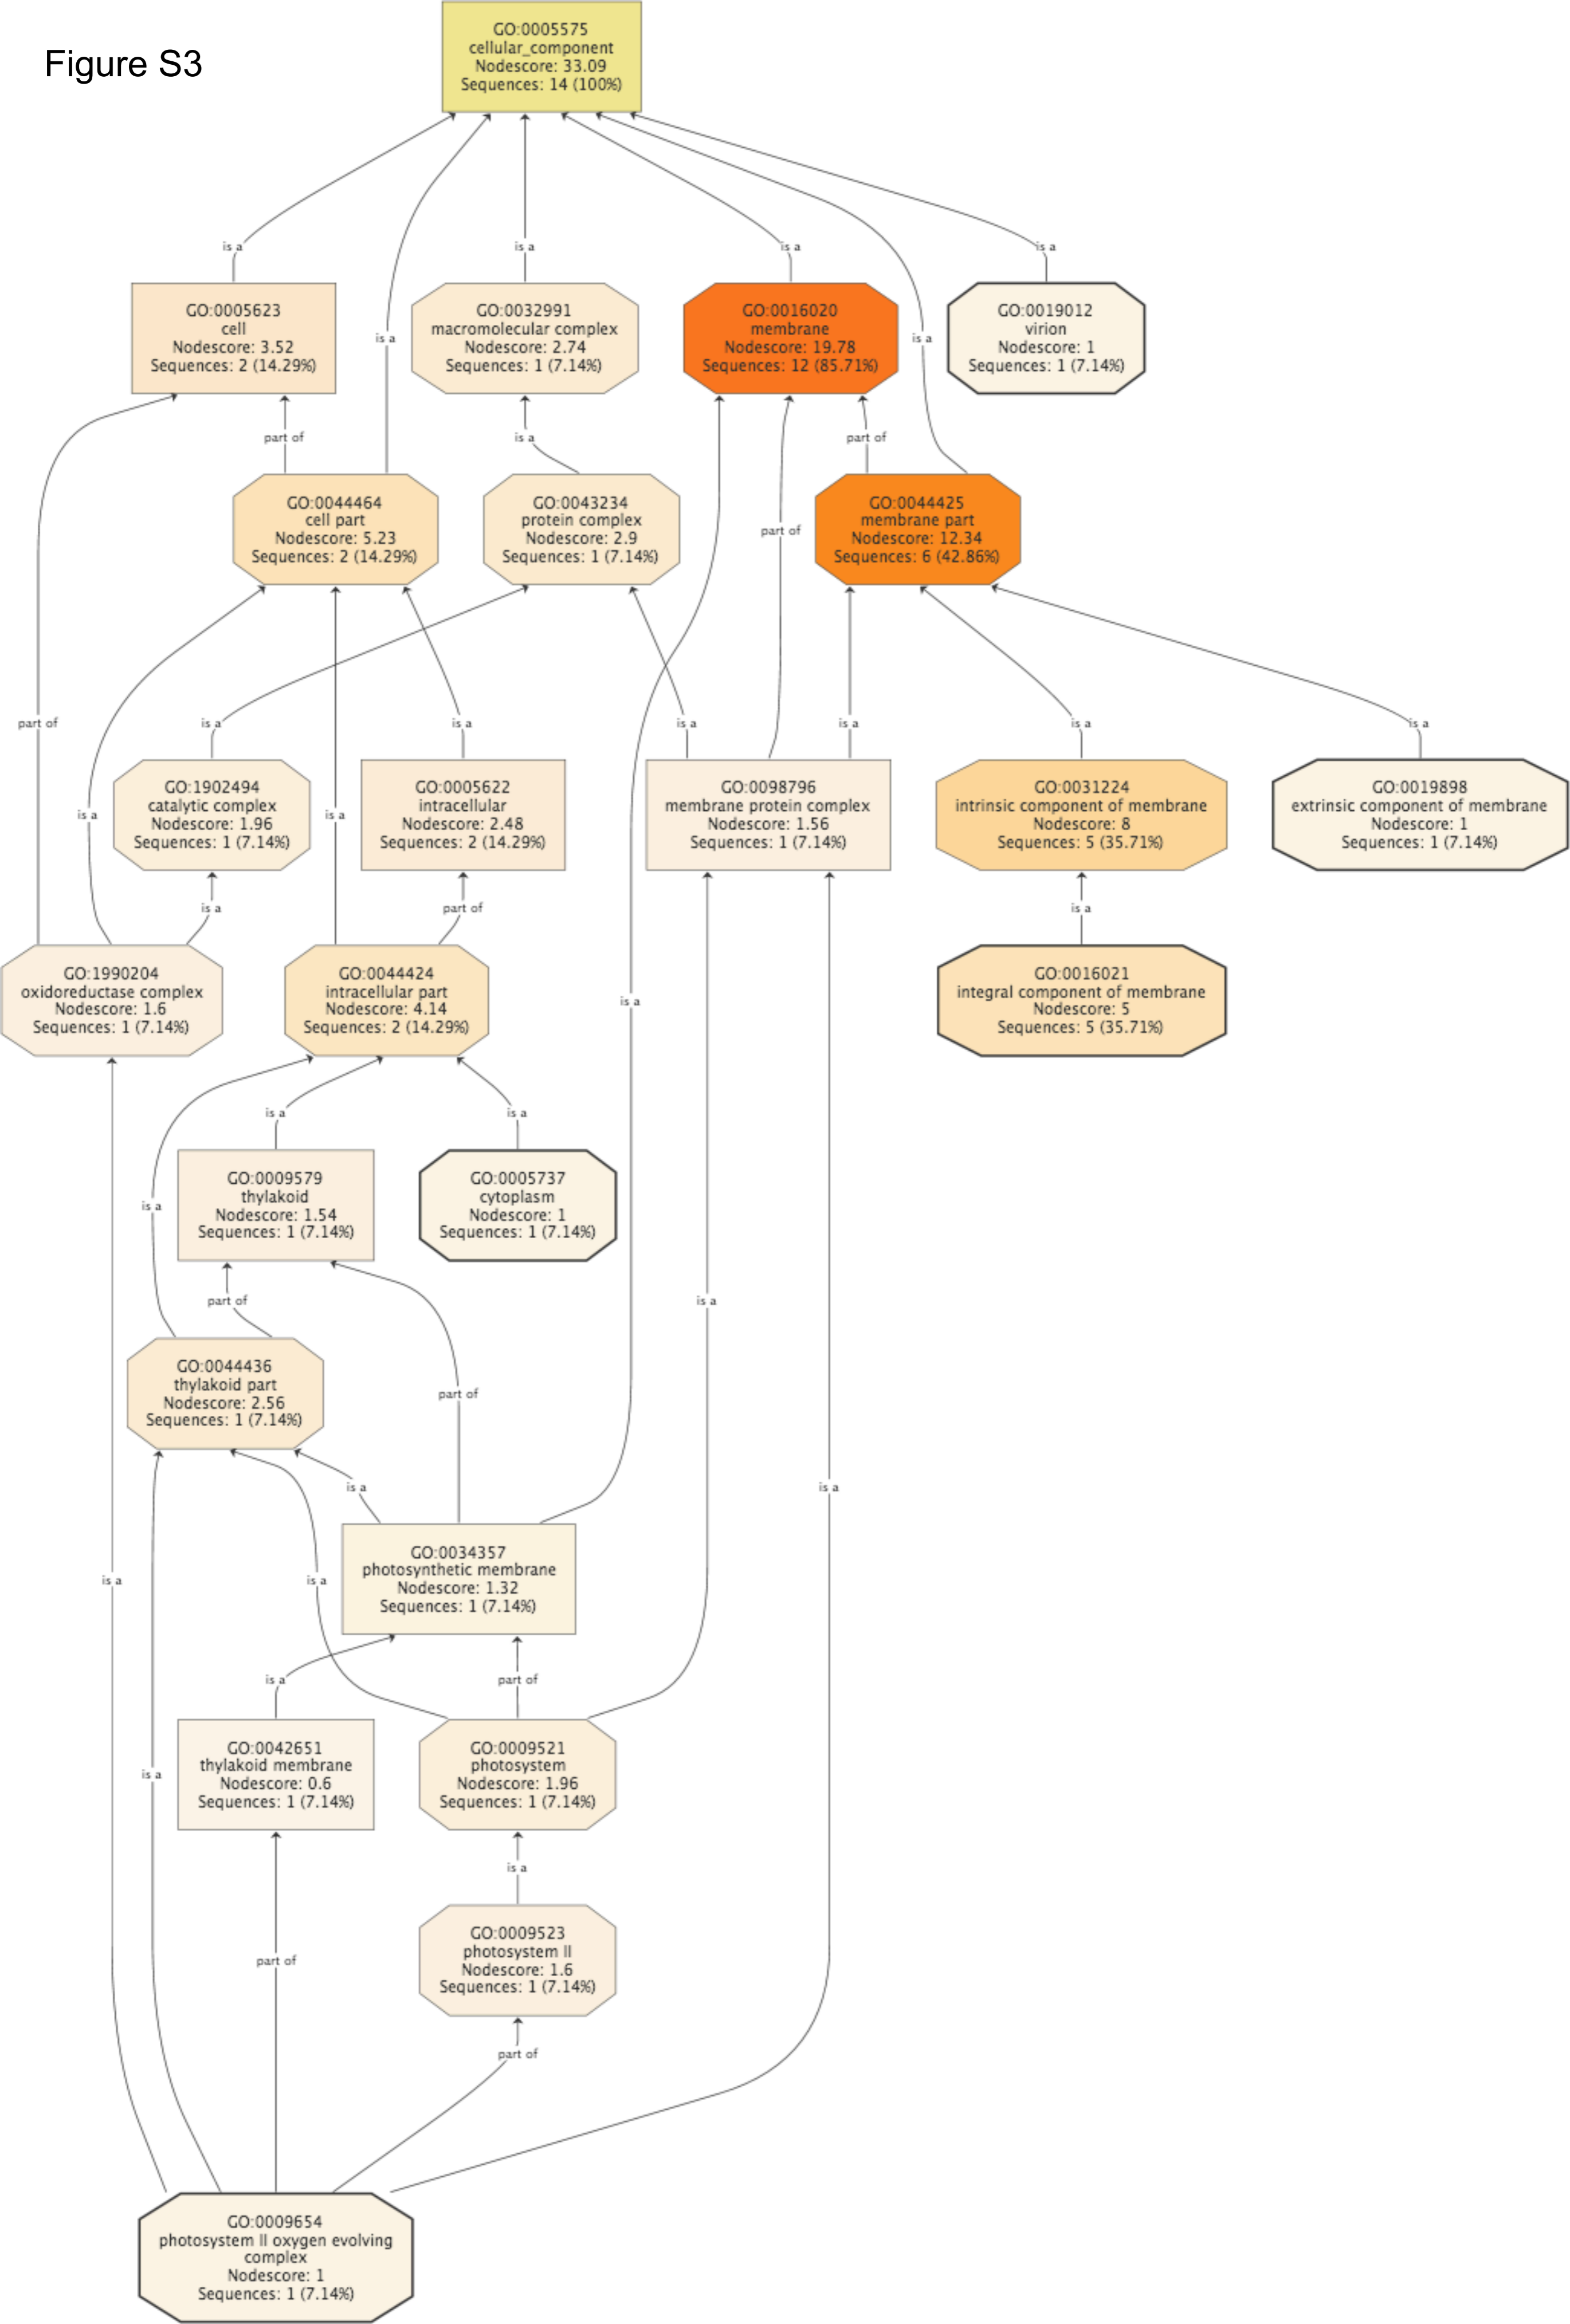

Supplement: 12985_2017_871_MOESM2_ESM.pdf [file 12985_2017_871_MOESM2_ESM.pdf]
