# Supplementary material for: In silico analysis of the grapefruit sRNAome, transcriptome and gene regulation in response to CTV-CDVd co-infection
Source: Virol J. 2017 Oct 23;14:200. doi: 10.1186/s12985-017-0871-9 (PMC5651572; doi:10.1186/s12985-017-0871-9)
Supplement: Supplementary file 1 — Results for the transcript differential expression analysis of ‘Marsh’ plants. Transcripts were considered to be differentially regulated as a result of infection if a |log2 fold change| > =1 and padj < =0.05 were observed. Table S2. Results for the transcript differential expression analysis of ‘Star Ruby’ plants. Transcripts were considered to be differentially regulated as a result of infection if a |log2 fold change| > =1 and padj < =0.05 were observed. Table S3. Results for the gene differential expression analysis across both ‘Marsh’ and ‘Star Ruby’ plants. Table S4. Biological process based characterisation of genes differentially expressed across both grapefruit varieties. Table S5. Molecular function based characterisation of genes differentially expressed across both grapefruit varieties. Table S6. Cellular component based characterisation of genes differentially expressed across both grapefruit varieties. (XLSX 392 kb) [file 12985_2017_871_MOESM1_ESM.xlsx]

## Sheet: Table S1
Table S1. Results for the transcript differential expression analysis of 'Marsh' plants. Transcripts were considered to be differentially regulated as a result of infection if a |log2 fold change|>=1 and padj<=0.05 were observed.
id	baseMeanA	baseMeanB	baseMean	log2FoldChange	|log2FoldChange|	lfcSE	stat	pvalue	padj	across-variety
TR54554|c0_g1_i3	0	758.622	379.311	7.64557	7.64557	0.48879	15.6418	3.77714e-55	1.65125e-50
TR54056|c0_g1_i4	268.749	0	134.374	-5.74503	5.74503	0.544487	-10.5513	5.01143e-26	1.09542e-21
TR53742|c0_g2_i2	0	168.878	84.4392	5.66132	5.66132	0.540126	10.4815	1.05098e-25	1.83782e-21
TR50528|c0_g1_i2	143.893	0	71.9465	-5.47616	5.47616	0.534579	-10.2439	1.26102e-24	1.8376e-20
TR53151|c0_g2_i6	0	151.641	75.8207	5.21908	5.21908	0.560312	9.31459	1.22427e-20	1.33803e-16
TR48785|c0_g1_i8	100.086	0	50.0431	-5.15969	5.15969	0.538533	-9.58102	9.60932e-22	1.20026e-17
TR54076|c2_g1_i5	87.8534	0	43.9267	-5.02521	5.02521	0.54156	-9.27913	1.70865e-20	1.65994e-16
TR44614|c0_g1_i2	110.586	0	55.2931	-4.85651	4.85651	0.561762	-8.64514	5.3739e-18	3.61432e-14
TR51130|c2_g4_i5	0	91.2162	45.6081	4.62952	4.62952	0.57461	8.05681	7.83132e-16	4.27952e-12
TR53541|c0_g1_i9	0	60.6202	30.3101	4.50885	4.50885	0.568769	7.92739	2.23804e-15	1.08712e-11
TR53990|c0_g2_i5	68.786	0	34.393	-4.50167	4.50167	0.565207	-7.96463	1.65719e-15	8.52323e-12
TR49548|c1_g1_i1	64.4678	0	32.2339	-4.41241	4.41241	0.568176	-7.76592	8.10529e-15	3.37466e-11
TR53613|c2_g1_i3	61.2973	0	30.6486	-4.29241	4.29241	0.57332	-7.48694	7.04957e-14	2.80169e-10
TR54076|c2_g1_i1	0	62.7327	31.3664	4.21524	4.21524	0.584364	7.21338	5.45802e-13	1.90887e-09
TR40927|c0_g1_i3	220.018	0	110.009	-4.1509	4.1509	0.599798	-6.92049	4.50076e-12	1.26942e-08
TR53755|c0_g1_i26	0	52.4312	26.2156	4.11593	4.11593	0.584747	7.03882	1.93873e-12	6.27819e-09
TR44683|c0_g1_i6	3.49659	132.335	67.9156	4.07675	4.07675	0.492156	8.28345	1.19659e-16	6.97482e-13
TR49548|c1_g1_i3	53.2008	0	26.6004	-4.06506	4.06506	0.581186	-6.99442	2.66352e-12	8.03043e-09
TR47473|c0_g1_i9	46.4737	0	23.2369	-4.02699	4.02699	0.57916	-6.95316	3.57195e-12	1.04103e-08
TR54566|c1_g8_i8	123.389	3.01145	63.2002	-4.01568	4.01568	0.510793	-7.86166	3.79065e-15	1.65716e-11
TR46651|c1_g1_i5	0	144.971	72.4853	3.92534	3.92534	0.603742	6.50169	7.94219e-11	1.73604e-07
TR51983|c1_g1_i7	78.8075	0	39.4037	-3.87735	3.87735	0.597058	-6.49409	8.35368e-11	1.78145e-07
TR47001|c1_g1_i13	0	64.3006	32.1503	3.81926	3.81926	0.599522	6.3705	1.88408e-10	3.66072e-07
TR47055|c0_g1_i1	49.2155	0	24.6078	-3.81058	3.81058	0.591311	-6.44429	1.16143e-10	2.3616e-07
TR52826|c2_g1_i13	53.0133	0.731783	26.8726	-3.80047	3.80047	0.558526	-6.80447	1.01425e-11	2.77125e-08
TR49548|c1_g1_i8	112.383	0	56.1915	-3.77768	3.77768	0.603665	-6.25792	3.90146e-10	6.96164e-07
TR54503|c0_g1_i44	55.3061	0	27.6531	-3.76389	3.76389	0.595485	-6.32071	2.60365e-10	4.94885e-07
TR29351|c0_g1_i2	0	42.8788	21.4394	3.76013	3.76013	0.595625	6.31292	2.73814e-10	5.01421e-07
TR46735|c0_g1_i4	0	34.5078	17.2539	3.73829	3.73829	0.592242	6.3121	2.75273e-10	5.01421e-07
TR51988|c0_g2_i10	61.1313	0	30.5657	-3.73321	3.73321	0.598227	-6.24045	4.36315e-10	7.62975e-07
TR51667|c1_g1_i14	1.13185	92.8423	46.9871	3.72693	3.72693	0.581144	6.41308	1.42605e-10	2.83376e-07
TR39766|c0_g1_i3	48.2411	0	24.1205	-3.70179	3.70179	0.59542	-6.21711	5.06401e-10	8.6817e-07
TR51568|c1_g1_i8	34.7511	0	17.3755	-3.66475	3.66475	0.589842	-6.21311	5.19445e-10	8.73406e-07
TR49407|c0_g1_i4	48.4371	0	24.2186	-3.65895	3.65895	0.597145	-6.1274	8.93278e-10	1.3466e-06
TR52086|c1_g1_i15	0	43.6154	21.8077	3.65697	3.65697	0.599614	6.09887	1.0682e-09	1.55662e-06
TR54599|c2_g2_i9	0	32.6609	16.3304	3.65172	3.65172	0.59487	6.13868	8.32074e-10	1.27634e-06
TR46735|c0_g1_i2	33.5157	0	16.7579	-3.58204	3.58204	0.592944	-6.0411	1.53063e-09	2.12427e-06
TR53755|c0_g1_i15	36.4407	0	18.2204	-3.57124	3.57124	0.595276	-5.9993	1.98164e-09	2.6252e-06
TR50498|c0_g1_i26	0	36.7884	18.3942	3.55695	3.55695	0.600529	5.92303	3.16065e-09	4.00505e-06
TR49548|c1_g1_i6	92.8922	0	46.4461	-3.52986	3.52986	0.607855	-5.80708	6.35713e-09	7.12602e-06
TR50093|c0_g1_i2	31.2136	0	15.6068	-3.51487	3.51487	0.594378	-5.91352	3.34876e-09	4.1828e-06
TR51768|c0_g1_i25	37.679	0.382755	19.0309	-3.50561	3.50561	0.582004	-6.02334	1.7085e-09	2.29818e-06
TR52755|c1_g1_i10	82.5424	1.46357	42.003	-3.50032	3.50032	0.578548	-6.05018	1.44683e-09	2.04036e-06
TR50384|c0_g1_i5	164.671	5.9596	85.3151	-3.48374	3.48374	0.532631	-6.54063	6.12601e-11	1.37339e-07	yes
TR48137|c0_g1_i18	46.2199	0.731783	23.4758	-3.48291	3.48291	0.575472	-6.05227	1.42819e-09	2.04036e-06
TR43464|c0_g1_i8	37.7429	0.33694	19.0399	-3.4753	3.4753	0.584918	-5.94151	2.82404e-09	3.63113e-06
TR46093|c0_g1_i6	49.4464	0	24.7232	-3.47044	3.47044	0.603822	-5.74746	9.05939e-09	9.54336e-06
TR46403|c0_g1_i2	0.863944	72.4684	36.6662	3.46293	3.46293	0.593247	5.83725	5.30692e-09	6.02605e-06
TR47258|c2_g1_i5	0	25.9167	12.9583	3.45629	3.45629	0.598486	5.77505	7.69307e-09	8.35468e-06
TR53532|c0_g3_i3	30.3376	0	15.1688	-3.45325	3.45325	0.596534	-5.78887	7.08636e-09	7.8429e-06
TR51584|c0_g1_i2	1.15192	69.2701	35.211	3.44134	3.44134	0.585221	5.88042	4.09223e-09	4.77067e-06
TR53041|c0_g1_i3	43.9355	0	21.9678	-3.43736	3.43736	0.603336	-5.69726	1.21746e-08	1.25232e-05
TR47001|c1_g1_i11	0	35.2128	17.6064	3.42867	3.42867	0.604144	5.67524	1.38491e-08	1.40801e-05	yes
TR49507|c1_g1_i17	0	36.6227	18.3113	3.41499	3.41499	0.605009	5.64454	1.65627e-08	1.62712e-05
TR51258|c0_g1_i4	4.2595	480.602	242.431	3.39513	3.39513	0.606096	5.60165	2.12327e-08	2.04006e-05
TR46690|c0_g1_i10	32.7224	0.365892	16.5441	-3.37636	3.37636	0.58475	-5.77403	7.73988e-09	8.35468e-06
TR48656|c0_g1_i2	0	68.1996	34.0998	3.35756	3.35756	0.610833	5.49668	3.87003e-08	3.38372e-05
TR45117|c0_g2_i4	27.4931	0	13.7465	-3.35054	3.35054	0.598909	-5.59441	2.2137e-08	2.10384e-05
TR54102|c0_g2_i3	0	36.5644	18.2822	3.34466	3.34466	0.606922	5.51086	3.57084e-08	3.25222e-05
TR52632|c0_g1_i10	0.28129	37.3108	18.7961	3.34211	3.34211	0.598331	5.58573	2.32717e-08	2.18789e-05
TR44070|c0_g1_i6	37.8968	0	18.9484	-3.32546	3.32546	0.60492	-5.49735	3.85538e-08	3.38372e-05
TR45246|c0_g4_i5	27.2812	0	13.6406	-3.30563	3.30563	0.600592	-5.50395	3.71368e-08	3.31328e-05
TR52513|c1_g1_i4	0	37.7958	18.8979	3.29704	3.29704	0.60844	5.41884	5.99879e-08	5.04147e-05
TR27983|c0_g1_i5	43.3372	0	21.6686	-3.29369	3.29369	0.607323	-5.42328	5.85142e-08	4.96712e-05
TR37422|c1_g1_i4	33.3301	0	16.6651	-3.28974	3.28974	0.604371	-5.44325	5.23174e-08	4.48463e-05
TR54742|c1_g2_i9	0	29.3888	14.6944	3.28438	3.28438	0.606289	5.41719	6.05433e-08	5.04147e-05
TR54855|c5_g7_i3	1.45697	59.6791	30.568	3.28347	3.28347	0.579251	5.66847	1.44075e-08	1.44794e-05
TR51663|c0_g2_i3	0	44.7249	22.3624	3.26477	3.26477	0.610336	5.34914	8.83735e-08	6.83792e-05
TR46553|c1_g2_i7	0	41.223	20.6115	3.25943	3.25943	0.609897	5.34424	9.0799e-08	6.90341e-05
TR44437|c0_g1_i4	0	41.0535	20.5268	3.25707	3.25707	0.609935	5.34003	9.29315e-08	7.00463e-05
TR44637|c0_g3_i21	25.5344	0	12.7672	-3.25449	3.25449	0.601412	-5.41141	6.25303e-08	5.1578e-05
TR48858|c0_g1_i2	0.287981	26.2126	13.2503	3.2544	3.2544	0.592848	5.48943	4.03236e-08	3.49075e-05
TR52934|c0_g2_i5	25.9873	0	12.9937	-3.25026	3.25026	0.601878	-5.40019	6.65687e-08	5.38923e-05
TR42709|c0_g1_i2	0	35.2791	17.6395	3.24973	3.24973	0.608978	5.33637	9.48275e-08	7.0264e-05
TR52325|c1_g1_i8	0.606408	68.0405	34.3234	3.23263	3.23263	0.605658	5.33739	9.42923e-08	7.0264e-05
TR47781|c1_g1_i2	26.0129	0	13.0065	-3.22981	3.22981	0.602672	-5.35914	8.36175e-08	6.5865e-05
TR52499|c0_g1_i4	0	25.3	12.65	3.22161	3.22161	0.606439	5.31235	1.0822e-07	7.80742e-05
TR49398|c1_g1_i18	35.0269	0.765511	17.8962	-3.21071	3.21071	0.579933	-5.53635	3.08842e-08	2.87269e-05
TR49838|c0_g3_i12	27.7549	0	13.8774	-3.21009	3.21009	0.604406	-5.31114	1.0894e-07	7.80742e-05
TR40281|c0_g1_i5	31.8452	0	15.9226	-3.20973	3.20973	0.606295	-5.294	1.19666e-07	8.37033e-05
TR54200|c4_g1_i15	26.9152	0	13.4576	-3.16435	3.16435	0.605497	-5.22603	1.73185e-07	0.000114714
TR50411|c0_g1_i14	0	33.2329	16.6165	3.16344	3.16344	0.610427	5.18234	2.19114e-07	0.00013984
TR49909|c2_g4_i12	26.8288	0	13.4144	-3.16208	3.16208	0.605546	-5.22186	1.77137e-07	0.000116449
TR50967|c1_g3_i7	36.7535	0	18.3768	-3.16096	3.16096	0.609126	-5.18933	2.11047e-07	0.000135681
TR53386|c0_g1_i1	0	27.9663	13.9831	3.14791	3.14791	0.609422	5.16541	2.39911e-07	0.000149831
TR29690|c0_g1_i2	0.569271	32.4931	16.5312	3.13534	3.13534	0.59316	5.28582	1.25142e-07	8.68389e-05
TR53687|c1_g1_i17	22.8981	0	11.449	-3.11691	3.11691	0.604747	-5.15407	2.54894e-07	0.000156947
TR42788|c0_g1_i5	0	29.2033	14.6016	3.1152	3.1152	0.61053	5.10245	3.35289e-07	0.000200792
TR53390|c2_g1_i1	171.908	0.765511	86.3369	-3.10667	3.10667	0.613346	-5.06511	4.08161e-07	0.000236339
TR52632|c0_g1_i7	31.4269	0.33694	15.8819	-3.1019	3.1019	0.599018	-5.17831	2.23899e-07	0.000141858
TR51081|c0_g2_i7	23.4217	0	11.7108	-3.08372	3.08372	0.606224	-5.08676	3.64231e-07	0.000214033
TR52757|c1_g1_i9	6.86354	190.846	98.855	3.07516	3.07516	0.578958	5.31154	1.08702e-07	7.80742e-05	yes
TR10807|c0_g2_i1	0	26.9797	13.4898	3.0672	3.0672	0.611	5.01996	5.16811e-07	0.000287814
TR51273|c0_g1_i5	35.2928	0	17.6464	-3.06443	3.06443	0.610975	-5.01564	5.28583e-07	0.000290188
TR52888|c0_g1_i1	0	23.5297	11.7649	3.05861	3.05861	0.610069	5.01355	5.34348e-07	0.000290188
TR53151|c0_g2_i11	0	22.126	11.063	3.05667	3.05667	0.609568	5.01449	5.31757e-07	0.000290188
TR47334|c0_g1_i2	22.1419	0	11.0709	-3.04417	3.04417	0.606727	-5.01736	5.23862e-07	0.000289894
TR27276|c0_g1_i3	3.76634	349.936	176.851	3.03843	3.03843	0.611722	4.96701	6.79926e-07	0.00034547	yes
TR49183|c0_g2_i6	0.606408	31.9535	16.28	3.03686	3.03686	0.597045	5.08649	3.64742e-07	0.000214033
TR44647|c0_g1_i8	30.7309	0	15.3654	-3.03666	3.03666	0.610513	-4.97395	6.56033e-07	0.000340825
TR44384|c0_g2_i1	0.879167	28.2759	14.5775	3.03357	3.03357	0.578331	5.24538	1.5596e-07	0.000105707
TR48892|c0_g1_i22	27.9484	0	13.9742	-3.03175	3.03175	0.609783	-4.97184	6.63189e-07	0.000340825
TR41257|c0_g1_i3	0	31.6134	15.8067	3.02793	3.02793	0.612696	4.94198	7.73349e-07	0.000386383
TR53679|c2_g1_i22	25.1405	0	12.5703	-3.02716	3.02716	0.608819	-4.97218	6.62033e-07	0.000340825
TR53820|c1_g1_i8	21.2426	0	10.6213	-3.02411	3.02411	0.606811	-4.98361	6.24089e-07	0.000332723
TR48131|c0_g2_i2	24.8061	0	12.4031	-3.02315	3.02315	0.608772	-4.96598	6.83559e-07	0.00034547
TR52190|c1_g2_i3	31.4188	0.765511	16.0922	-3.01836	3.01836	0.588074	-5.13262	2.85742e-07	0.000172674
TR53967|c0_g2_i14	48.8638	0	24.4319	-3.00467	3.00467	0.613735	-4.89571	9.79515e-07	0.000457083
TR52984|c0_g1_i3	24.556	0	12.278	-3.00412	3.00412	0.609196	-4.93129	8.16891e-07	0.00040191
TR53930|c0_g1_i8	27.6051	0	13.8026	-2.99877	2.99877	0.610466	-4.91226	9.00323e-07	0.000425507
TR52050|c1_g5_i3	0	39.2199	19.61	2.99539	2.99539	0.614065	4.87796	1.07187e-06	0.000491844	yes
TR54246|c1_g7_i2	2.62412	40.6068	21.6154	2.99529	2.99529	0.511344	5.85767	4.69401e-09	5.40021e-06
TR51174|c1_g1_i6	28.9616	0.673881	14.8177	-2.97991	2.97991	0.588856	-5.06051	4.18132e-07	0.000238947
TR46142|c1_g1_i7	2.34952	48.7528	25.5512	2.97555	2.97555	0.558374	5.32895	9.87828e-08	7.25796e-05
TR45638|c0_g1_i11	25.8736	0	12.9368	-2.96242	2.96242	0.610754	-4.85042	1.23197e-06	0.000558116
TR51995|c2_g2_i9	0.84387	38.2157	19.5298	2.95512	2.95512	0.598506	4.9375	7.91296e-07	0.000393103
TR53408|c0_g4_i5	0	25.1292	12.5646	2.95279	2.95279	0.612767	4.81878	1.44441e-06	0.000637831
TR50905|c1_g1_i2	29.6545	0.731783	15.1931	-2.93949	2.93949	0.591344	-4.97086	6.66573e-07	0.000340825
TR48165|c0_g1_i7	24.1396	0	12.0698	-2.93684	2.93684	0.610753	-4.80856	1.5202e-06	0.000667925
TR47496|c1_g1_i1	10.1111	211.039	110.575	2.93073	2.93073	0.570158	5.1402	2.74445e-07	0.000167803	yes
TR43963|c1_g3_i1	7.00289	216.777	111.89	2.92605	2.92605	0.59497	4.91797	8.74452e-07	0.000420093	yes
TR28538|c0_g1_i2	0	23.2463	11.6231	2.91219	2.91219	0.613052	4.75032	2.03093e-06	0.000866206
TR53646|c2_g1_i18	41.9367	2.57079	22.2538	-2.89728	2.89728	0.535734	-5.40806	6.37106e-08	5.20605e-05
TR52253|c0_g1_i5	19.7248	0	9.86238	-2.89476	2.89476	0.609806	-4.74701	2.06447e-06	0.000876239
TR52757|c1_g1_i3	9.98993	225.532	117.761	2.89138	2.89138	0.580379	4.98188	6.297e-07	0.00033368
TR45817|c0_g3_i15	27.3201	0	13.66	-2.88925	2.88925	0.612709	-4.71553	2.41085e-06	0.000971383
TR46752|c0_g1_i7	0	25.6869	12.8435	2.88496	2.88496	0.613968	4.69888	2.61591e-06	0.00103964
TR45455|c0_g1_i3	19.1792	0	9.58962	-2.88463	2.88463	0.609774	-4.73066	2.23793e-06	0.000922977
TR47820|c1_g3_i9	23.6026	0	11.8013	-2.88098	2.88098	0.611836	-4.70874	2.49248e-06	0.000995104
TR53306|c5_g1_i2	0.28129	24.9125	12.5969	2.87787	2.87787	0.607954	4.73369	2.20472e-06	0.000916899
TR45321|c0_g1_i6	1.15192	53.1091	27.1305	2.87485	2.87485	0.60452	4.7556	1.97862e-06	0.000848031
TR49478|c1_g2_i13	0.575962	25.3875	12.9817	2.87456	2.87456	0.598607	4.80209	1.5702e-06	0.000686447
TR38227|c0_g1_i1	23.4295	0	11.7148	-2.85472	2.85472	0.612329	-4.66208	3.13036e-06	0.00121644
TR53866|c2_g2_i29	0	18.903	9.45148	2.85432	2.85432	0.612837	4.65756	3.19982e-06	0.00123793
TR53650|c0_g1_i12	23.8053	0	11.9026	-2.85118	2.85118	0.612504	-4.65495	3.24053e-06	0.0012401
TR40330|c0_g1_i8	20.8219	0	10.4109	-2.84521	2.84521	0.611581	-4.65221	3.28394e-06	0.00124838
TR47951|c0_g2_i6	19.7448	0	9.87241	-2.84487	2.84487	0.611118	-4.65519	3.2368e-06	0.0012401
TR51258|c0_g1_i6	7.40111	177.371	92.3862	2.84352	2.84352	0.587661	4.8387	1.3069e-06	0.00058592
TR40699|c0_g1_i1	343.539	30.8333	187.186	-2.8219	2.8219	0.478514	-5.89722	3.6968e-09	4.48925e-06
TR53442|c1_g1_i2	21.2724	0	10.6362	-2.82109	2.82109	0.612295	-4.60741	4.07719e-06	0.00148535
TR43797|c0_g1_i14	0	24.2424	12.1212	2.82041	2.82041	0.614585	4.58913	4.45101e-06	0.00159825
TR40281|c0_g1_i1	0	17.8196	8.9098	2.80436	2.80436	0.613387	4.57193	4.83254e-06	0.00170374
TR31905|c0_g1_i3	27.2141	0	13.6071	-2.80426	2.80426	0.614083	-4.56657	4.95758e-06	0.00174081
TR53115|c0_g2_i4	30.4616	0	15.2308	-2.803	2.803	0.614575	-4.56088	5.09402e-06	0.00177447
TR45888|c1_g2_i5	0.575962	27.4035	13.9897	2.77737	2.77737	0.605264	4.5887	4.4602e-06	0.00159825
TR53811|c1_g1_i4	24.3448	0	12.1724	-2.77511	2.77511	0.61399	-4.5198	6.18982e-06	0.00209768
TR49241|c0_g1_i5	260.038	7.3347	133.687	-2.77273	2.77273	0.605969	-4.57569	4.74647e-06	0.00168017
TR47158|c1_g3_i9	0	31.1721	15.586	2.76815	2.76815	0.615712	4.49585	6.92931e-06	0.00230364
TR40407|c0_g5_i5	0	28.4613	14.2307	2.75969	2.75969	0.615616	4.48281	7.36679e-06	0.0024081
TR47293|c0_g1_i3	0	22.5094	11.2547	2.75907	2.75907	0.615048	4.48595	7.25912e-06	0.00238607
TR49424|c0_g3_i11	0	16.3417	8.17086	2.75131	2.75131	0.613805	4.48239	7.38122e-06	0.0024081
TR52730|c4_g1_i3	19.8649	0	9.93243	-2.7475	2.7475	0.613277	-4.48003	7.46336e-06	0.00241686
TR47276|c0_g1_i1	20.0377	0	10.0188	-2.74276	2.74276	0.613415	-4.4713	7.77458e-06	0.00249913
TR54098|c2_g2_i6	25.0906	0	12.5453	-2.74136	2.74136	0.6146	-4.46039	8.18097e-06	0.00258229
TR45418|c0_g1_i1	0	45.0704	22.5352	2.7382	2.7382	0.616194	4.44373	8.84139e-06	0.00271633
TR47724|c0_g1_i3	18.4078	0	9.2039	-2.73606	2.73606	0.612956	-4.46371	8.05509e-06	0.00255177
TR45307|c0_g2_i8	41.6897	0.731783	21.2108	-2.73548	2.73548	0.609768	-4.4861	7.25404e-06	0.00238607
TR49186|c0_g1_i5	20.2794	0	10.1397	-2.73262	2.73262	0.613661	-4.45298	8.46882e-06	0.0026351
TR52384|c0_g1_i4	386.88	43.6469	215.263	-2.72924	2.72924	0.416351	-6.55515	5.55877e-11	1.27901e-07
TR52054|c0_g1_i6	20.7093	0	10.3547	-2.72769	2.72769	0.613871	-4.44342	8.85415e-06	0.00271633
TR48051|c0_g2_i11	18.96	0	9.48	-2.71833	2.71833	0.6135	-4.43085	9.38628e-06	0.00282993
TR50795|c0_g2_i6	35.7563	0	17.8781	-2.71764	2.71764	0.615791	-4.41325	1.0183e-05	0.00298771
TR45566|c0_g3_i2	4.98702	80.3271	42.6571	2.71514	2.71514	0.565937	4.79759	1.60582e-06	0.000698524
TR46995|c0_g1_i10	19.7125	0	9.85627	-2.71424	2.71424	0.613816	-4.42191	9.78342e-06	0.00292946
TR54022|c0_g1_i2	20.4719	0	10.2359	-2.70374	2.70374	0.614189	-4.40212	1.07196e-05	0.0031242
TR47856|c0_g1_i11	2.55168	92.1459	47.3488	2.70287	2.70287	0.607722	4.44754	8.68587e-06	0.00268354	yes
TR53397|c3_g2_i1	62.8788	3.11932	32.9991	-2.69222	2.69222	0.583869	-4.611	4.00737e-06	0.00146603
TR54295|c0_g1_i6	0	17.7153	8.85763	2.68998	2.68998	0.615049	4.37361	1.22211e-05	0.00346928
TR49694|c0_g1_i1	18.0437	0	9.02185	-2.68946	2.68946	0.613705	-4.38233	1.17419e-05	0.00337711
TR52453|c1_g1_i3	19.0928	0	9.54638	-2.6888	2.6888	0.614055	-4.37876	1.19356e-05	0.00341037
TR48974|c0_g1_i7	17.6754	0	8.83772	-2.68815	2.68815	0.6136	-4.38095	1.18162e-05	0.00338732
TR43963|c1_g3_i2	38.9424	424.389	231.666	2.68708	2.68708	0.506873	5.30128	1.14991e-07	8.10819e-05	yes
TR51820|c0_g1_i8	0	20.8906	10.4453	2.68641	2.68641	0.615553	4.36422	1.27578e-05	0.0035752
TR50694|c0_g1_i17	0.606408	26.1588	13.3826	2.6835	2.6835	0.607363	4.41828	9.94894e-06	0.0029581
TR50098|c0_g2_i1	0	15.1235	7.56173	2.67254	2.67254	0.614634	4.34819	1.37266e-05	0.003798
TR54469|c0_g2_i12	26.5482	0	13.2741	-2.66987	2.66987	0.615552	-4.33736	1.44205e-05	0.00390354
TR53601|c0_g1_i2	0	15.1355	7.56777	2.66978	2.66978	0.614675	4.34341	1.4029e-05	0.00383315
TR52294|c0_g1_i5	48.3077	0	24.1538	-2.66481	2.66481	0.616256	-4.32419	1.53091e-05	0.0040809	yes
TR48377|c0_g2_i4	26.2472	0	13.1236	-2.66057	2.66057	0.615599	-4.32192	1.54681e-05	0.00411075
TR46323|c1_g1_i3	3.7006	105.618	54.6592	2.65795	2.65795	0.604359	4.39797	1.09266e-05	0.00317395
TR53478|c1_g1_i13	28.3126	0.673881	14.4932	-2.65752	2.65752	0.605779	-4.38694	1.14958e-05	0.00332822
TR50859|c0_g3_i13	23.8455	527.712	275.779	2.64919	2.64919	0.597319	4.43513	9.20165e-06	0.00278387
TR46016|c0_g1_i4	16.2434	0	8.12169	-2.64454	2.64454	0.613841	-4.30819	1.64597e-05	0.00433475
TR48699|c0_g1_i5	0	17.5425	8.77124	2.64287	2.64287	0.615503	4.29384	1.75608e-05	0.00456967
TR46323|c1_g1_i13	16.2385	0	8.11927	-2.64072	2.64072	0.613907	-4.3015	1.69644e-05	0.00444091
TR48994|c0_g1_i6	0	23.7585	11.8792	2.63885	2.63885	0.616071	4.28335	1.84099e-05	0.00470659
TR45239|c0_g1_i2	17.069	0	8.53451	-2.63567	2.63567	0.614286	-4.29063	1.78171e-05	0.00461725
TR51076|c1_g1_i2	0	18.7728	9.38641	2.63262	2.63262	0.615746	4.2755	1.90707e-05	0.00484718
TR51223|c0_g1_i13	28.026	0	14.013	-2.63161	2.63161	0.615931	-4.27258	1.93225e-05	0.00488278
TR50149|c0_g1_i2	0	22.454	11.227	2.63106	2.63106	0.616042	4.27091	1.94677e-05	0.00488861
TR48011|c0_g1_i2	16.7877	0	8.39387	-2.62595	2.62595	0.614348	-4.27437	1.91681e-05	0.0048578
TR53861|c0_g1_i9	20.187	0	10.0935	-2.61996	2.61996	0.615237	-4.25845	2.0585e-05	0.00506994
TR40945|c0_g1_i2	15.9402	0	7.97009	-2.61104	2.61104	0.614297	-4.25044	2.13348e-05	0.00521464
TR53161|c1_g1_i11	28.9536	1.48521	15.2194	-2.60233	2.60233	0.585101	-4.44766	8.6812e-06	0.00268354
TR48004|c1_g1_i11	0	27.5711	13.7856	2.60171	2.60171	0.616271	4.2217	2.42462e-05	0.0056683
TR51312|c0_g2_i1	16.4522	0	8.22612	-2.60036	2.60036	0.614632	-4.23076	2.32902e-05	0.00548883
TR24549|c0_g1_i1	4.02873	49.0392	26.534	2.59693	2.59693	0.542371	4.7881	1.68364e-06	0.000728751
TR54149|c1_g5_i1	16.1795	0	8.08974	-2.59638	2.59638	0.614606	-4.22447	2.39507e-05	0.00562931
TR51851|c0_g2_i10	16.9204	0	8.46019	-2.5951	2.5951	0.614833	-4.22082	2.43415e-05	0.00567539
TR41687|c0_g1_i2	127.139	13.5737	70.3563	-2.5934	2.5934	0.485267	-5.34427	9.0782e-08	6.90341e-05
TR52317|c0_g1_i3	1.12516	43.4076	22.2664	2.59153	2.59153	0.610457	4.24524	2.18361e-05	0.00527408
TR53090|c0_g3_i10	3.54895	69.2019	36.3754	2.58939	2.58939	0.592595	4.36958	1.24483e-05	0.00351099	yes
TR53237|c1_g1_i9	0.575962	21.379	10.9775	2.58757	2.58757	0.607138	4.26192	2.02674e-05	0.00500877
TR42548|c0_g1_i1	16.7439	0	8.37195	-2.5806	2.5806	0.614984	-4.19622	2.71411e-05	0.00617983
TR47155|c0_g1_i2	77.4695	2.56124	40.0154	-2.57472	2.57472	0.607874	-4.23562	2.27923e-05	0.00541528
TR52966|c0_g2_i9	0	17.9679	8.98394	2.56618	2.56618	0.616083	4.16531	3.10924e-05	0.00689983
TR49571|c0_g1_i14	23.7	0	11.85	-2.56615	2.56615	0.61604	-4.16555	3.10604e-05	0.00689983
TR47741|c0_g1_i8	77.534	2.92713	40.2306	-2.56408	2.56408	0.605235	-4.2365	2.27028e-05	0.00540871
TR53161|c1_g1_i7	16.7049	0	8.35246	-2.56408	2.56408	0.615179	-4.16801	3.07264e-05	0.0068534
TR54219|c2_g1_i5	0	20.0121	10.006	2.55366	2.55366	0.616224	4.14405	3.41228e-05	0.00731723
TR47244|c0_g1_i1	0	15.3936	7.69679	2.55229	2.55229	0.615915	4.1439	3.4145e-05	0.00731723
TR48824|c0_g1_i8	16.722	0	8.361	-2.55139	2.55139	0.615328	-4.14639	3.37752e-05	0.00731723
TR49020|c0_g2_i8	24.9364	1.06872	13.0026	-2.54951	2.54951	0.595634	-4.28033	1.86614e-05	0.00475696
TR51312|c0_g2_i3	0	14.5749	7.28747	2.54839	2.54839	0.615834	4.13811	3.50178e-05	0.00748593
TR43872|c0_g4_i1	32.1764	1.43462	16.8055	-2.54716	2.54716	0.596536	-4.26992	1.95546e-05	0.00488861
TR47745|c1_g1_i1	26.1171	1.01082	13.5639	-2.5452	2.5452	0.599226	-4.24747	2.16194e-05	0.00524855
TR53330|c0_g1_i1	17.9238	0	8.96188	-2.54315	2.54315	0.615629	-4.13097	3.61228e-05	0.00764737
TR42260|c0_g2_i11	0	14.2832	7.14159	2.5415	2.5415	0.615848	4.12683	3.67792e-05	0.00774879
TR45343|c0_g1_i4	5.15757	69.4417	37.2996	2.53894	2.53894	0.566687	4.48033	7.45289e-06	0.00241686
TR51637|c1_g2_i7	35.8623	1.53102	18.6966	-2.53372	2.53372	0.600478	-4.21951	2.44832e-05	0.00569325
TR41856|c0_g1_i4	21.4125	0.673881	11.0432	-2.53075	2.53075	0.603834	-4.19113	2.77574e-05	0.00629326
TR36287|c0_g3_i5	30.6133	227.031	128.822	2.52181	2.52181	0.410589	6.14192	8.15274e-10	1.2729e-06	yes
TR53384|c0_g2_i2	18.7372	0	9.36859	-2.52132	2.52132	0.615907	-4.09367	4.24606e-05	0.00883929
TR75298|c0_g1_i1	0	13.8215	6.91076	2.51844	2.51844	0.615935	4.08881	4.33599e-05	0.00887853
TR43801|c0_g1_i2	15.7228	0	7.8614	-2.5166	2.5166	0.615481	-4.08884	4.33543e-05	0.00887853
TR53621|c0_g2_i1	0	27.9491	13.9746	2.51065	2.51065	0.616196	4.07444	4.61248e-05	0.00933422
TR51712|c2_g1_i10	41.9871	1.6847	21.8359	-2.5082	2.5082	0.603457	-4.15639	3.23319e-05	0.00705158
TR45109|c0_g1_i2	16.1959	0	8.09794	-2.50814	2.50814	0.615657	-4.07393	4.62259e-05	0.00933422
TR41000|c1_g1_i2	0.575962	53.3117	26.9438	2.50791	2.50791	0.616187	4.07005	4.70027e-05	0.00942576
TR47315|c0_g1_i1	0	25.6577	12.8289	2.50551	2.50551	0.616225	4.0659	4.78482e-05	0.0095464
TR18912|c0_g1_i1	0	20.2781	10.1391	2.49395	2.49395	0.616284	4.04675	5.19327e-05	0.0102369
TR54381|c0_g1_i11	0	17.085	8.54248	2.49329	2.49329	0.616267	4.0458	5.21458e-05	0.0102369
TR49781|c0_g1_i10	0	26.4684	13.2342	2.48852	2.48852	0.616159	4.03876	5.3734e-05	0.0104173
TR45458|c0_g1_i3	1.15192	38.6819	19.9169	2.4873	2.4873	0.611388	4.06828	4.73607e-05	0.00947582
TR38317|c0_g1_i4	32.3643	1.48521	16.9248	-2.48676	2.48676	0.599782	-4.14611	3.38173e-05	0.00731723
TR46714|c0_g1_i4	0	25.9822	12.9911	2.48638	2.48638	0.616166	4.03525	5.45444e-05	0.0105101
TR52730|c4_g1_i1	0.303204	21.286	10.7946	2.48387	2.48387	0.614985	4.03892	5.36979e-05	0.0104173
TR50760|c0_g2_i7	85.2018	12.062	48.6319	-2.47963	2.47963	0.400554	-6.1905	5.99734e-10	9.71058e-07
TR9918|c0_g1_i1	0.303204	16.0843	8.19376	2.4784	2.4784	0.612909	4.04366	5.26239e-05	0.0102933
TR46993|c0_g1_i12	0.606408	27.1502	13.8783	2.47705	2.47705	0.613623	4.03676	5.41943e-05	0.0104832
TR38084|c0_g1_i4	14.219	0	7.10949	-2.4754	2.4754	0.615567	-4.02133	5.78693e-05	0.0110475
TR53525|c5_g1_i2	121.898	1221.37	671.632	2.47486	2.47486	0.533746	4.63678	3.53884e-06	0.00131666	yes
TR40359|c0_g1_i6	239.231	1601.03	920.13	2.47274	2.47274	0.366664	6.74389	1.54204e-11	3.8522e-08	yes
TR48608|c0_g1_i1	6430.19	1048.11	3739.15	-2.47165	2.47165	0.28233	-8.75447	2.05064e-18	1.49413e-14	yes
TR51987|c0_g2_i3	18.5333	0	9.26663	-2.47131	2.47131	0.616154	-4.01087	6.04953e-05	0.0114736
TR51678|c4_g1_i1	69.5983	678.621	374.109	2.46116	2.46116	0.530545	4.63892	3.50227e-06	0.00130862	yes
TR38913|c0_g1_i3	0.303204	18.2988	9.30099	2.45932	2.45932	0.614421	4.00267	6.26324e-05	0.0117694
TR53854|c1_g1_i10	0	23.8479	11.924	2.45769	2.45769	0.616121	3.98898	6.63587e-05	0.01224
TR52123|c1_g1_i13	16.6793	0	8.33967	-2.45723	2.45723	0.616081	-3.98849	6.64961e-05	0.01224
TR52982|c0_g1_i7	0	14.5959	7.29797	2.45341	2.45341	0.616266	3.98109	6.85997e-05	0.0124957
TR53220|c1_g1_i5	3.14287	60.7873	31.9651	2.45133	2.45133	0.600685	4.08088	4.48646e-05	0.0091242	yes
TR54092|c0_g1_i4	29.861	0	14.9305	-2.45101	2.45101	0.616166	-3.97783	6.95456e-05	0.0125374
TR52306|c0_g1_i6	21.6372	1.03977	11.3385	-2.44156	2.44156	0.596711	-4.09169	4.28249e-05	0.00885444
TR42862|c0_g1_i3	0	14.5606	7.2803	2.44079	2.44079	0.61628	3.96052	7.47882e-05	0.01319
TR41128|c0_g1_i24	14.3152	0	7.15759	-2.43953	2.43953	0.615895	-3.96095	7.46522e-05	0.01319
TR50405|c1_g1_i8	13.9882	0	6.99411	-2.4387	2.4387	0.615846	-3.95992	7.49759e-05	0.01319
TR30963|c0_g1_i1	0.303204	21.6332	10.9682	2.42984	2.42984	0.615669	3.94666	7.92479e-05	0.0138579	yes
TR52385|c0_g1_i9	14.4431	0	7.22153	-2.424	2.424	0.616021	-3.93494	8.32184e-05	0.0144082
TR49038|c1_g1_i3	16.8948	0	8.44739	-2.42006	2.42006	0.616236	-3.92717	8.59499e-05	0.0147932	yes
TR19480|c0_g1_i1	0.575962	19.0735	9.82473	2.41888	2.41888	0.610835	3.95995	7.49643e-05	0.01319
TR50504|c0_g3_i2	0	12.6732	6.33662	2.41813	2.41813	0.61626	3.92388	8.71349e-05	0.0149383
TR52720|c0_g1_i4	25.4668	1.09767	13.2822	-2.41732	2.41732	0.603982	-4.00231	6.27276e-05	0.0117694
TR44210|c0_g1_i1	53.9303	6.49666	30.2135	-2.41496	2.41496	0.492975	-4.89874	9.64517e-07	0.000453396
TR46445|c0_g1_i1	20.311	0	10.1555	-2.41279	2.41279	0.616281	-3.91509	9.03716e-05	0.0154026
TR37208|c0_g3_i1	234.642	37.8059	136.224	-2.41228	2.41228	0.342102	-7.05135	1.77188e-12	5.95856e-09	yes
TR48930|c0_g1_i4	2.60705	54.1349	28.371	2.40813	2.40813	0.605243	3.97878	6.92698e-05	0.0125135
TR18894|c0_g2_i2	0.303204	20.0045	10.1538	2.40711	2.40711	0.615591	3.91025	9.22016e-05	0.0156786
TR37509|c0_g1_i5	1.18237	24.1467	12.6645	2.40662	2.40662	0.602265	3.99595	6.44341e-05	0.0120379
TR9560|c0_g2_i1	49.7178	4.31817	27.018	-2.40455	2.40455	0.563158	-4.26975	1.95692e-05	0.00488861
TR48920|c0_g1_i10	200.117	29.7445	114.931	-2.40343	2.40343	0.407304	-5.90084	3.61656e-09	4.45367e-06
TR44407|c0_g3_i1	0	14.9475	7.47375	2.40324	2.40324	0.616263	3.8997	9.63116e-05	0.0162137
TR54318|c0_g1_i28	15.3301	0	7.66505	-2.40044	2.40044	0.616212	-3.89548	9.80034e-05	0.0163527
TR54200|c4_g1_i7	13.9986	0	6.99929	-2.39967	2.39967	0.6161	-3.89493	9.82286e-05	0.0163591
TR46323|c1_g1_i17	0	34.1445	17.0723	2.39212	2.39212	0.615306	3.88769	0.000101204	0.0167271
TR47382|c0_g1_i5	63.9632	3.60101	33.7821	-2.38374	2.38374	0.600492	-3.96964	7.19812e-05	0.0128917
TR35462|c0_g1_i2	54.8509	6.62933	30.7401	-2.37829	2.37829	0.504303	-4.71599	2.40539e-06	0.000971383	yes
TR47383|c0_g3_i33	16.2154	0	8.10768	-2.37404	2.37404	0.616286	-3.85218	0.000117073	0.0187919
TR44365|c0_g2_i2	0	17.6252	8.81259	2.37392	2.37392	0.616027	3.8536	0.000116393	0.0187661
TR54855|c3_g1_i1	6.36302	52.0582	29.2106	2.37122	2.37122	0.501403	4.72916	2.25455e-06	0.000925466
TR33172|c0_g2_i3	0	32.0528	16.0264	2.36971	2.36971	0.615183	3.85205	0.000117135	0.0187919
TR51758|c0_g2_i5	27.4997	1.14827	14.324	-2.36786	2.36786	0.607847	-3.89549	9.80007e-05	0.0163527
TR51174|c1_g1_i5	0.287981	14.3242	7.3061	2.36162	2.36162	0.614406	3.84375	0.000121168	0.0193325
TR50223|c0_g3_i2	0	12.2663	6.13316	2.36127	2.36127	0.616276	3.83151	0.00012736	0.0199921
TR32803|c0_g1_i1	5.37002	86.1393	45.7547	2.36058	2.36058	0.598752	3.9425	8.06374e-05	0.0140447
TR53236|c0_g1_i14	0	26.294	13.147	2.35776	2.35776	0.615357	3.83153	0.000127348	0.0199921
TR51844|c0_g1_i3	16.5253	0	8.26267	-2.35296	2.35296	0.616274	-3.81805	0.000134513	0.0207439	yes
TR54569|c0_g1_i5	13.7106	0	6.8553	-2.35286	2.35286	0.61625	-3.81803	0.000134522	0.0207439
TR47715|c0_g1_i4	36.8517	1.39358	19.1226	-2.35208	2.35208	0.61089	-3.85025	0.000117998	0.0188957
TR48028|c0_g1_i15	0	13.8311	6.91553	2.35154	2.35154	0.616177	3.81634	0.000135443	0.0208126
TR54454|c2_g1_i14	80.8134	0	40.4067	-2.35097	2.35097	0.614252	-3.82738	0.000129516	0.020294
TR41412|c0_g5_i1	5.80597	59.6288	32.7174	2.34438	2.34438	0.558538	4.19735	2.70061e-05	0.00616514	yes
TR47466|c0_g1_i1	15.9524	0.382755	8.16757	-2.34413	2.34413	0.613014	-3.82394	0.000131334	0.0203861
TR44384|c0_g2_i11	13.3855	82.8438	48.1147	2.3339	2.3339	0.386695	6.0355	1.58473e-09	2.16498e-06
TR54604|c0_g1_i10	2.53161	65.9955	34.2636	2.33371	2.33371	0.61285	3.80797	0.000140114	0.0213428
TR45772|c0_g2_i8	20.2264	0.731783	10.4791	-2.33274	2.33274	0.610016	-3.82406	0.000131274	0.0203861
TR43654|c0_g1_i2	18.7036	0	9.35182	-2.32809	2.32809	0.616104	-3.77872	0.000157635	0.0234798
TR29690|c0_g1_i1	3.63845	115.509	59.5739	2.32368	2.32368	0.615206	3.77708	0.00015868	0.0235153
TR31421|c0_g1_i2	27.5856	2.22908	14.9073	-2.31557	2.31557	0.579928	-3.99285	6.52841e-05	0.0120844
TR40550|c0_g1_i5	0.575962	27.776	14.176	2.31548	2.31548	0.615981	3.75901	0.000170589	0.0247761
TR52145|c1_g1_i1	39.2157	4.4292	21.8225	-2.31029	2.31029	0.535774	-4.31207	1.61734e-05	0.00427221
TR36221|c0_g3_i1	5.9679	90.6715	48.3197	2.31009	2.31009	0.599511	3.85328	0.000116545	0.0187661	yes
TR44090|c0_g1_i11	0	18.6484	9.32421	2.30913	2.30913	0.615472	3.7518	0.000175568	0.0252893
TR51258|c0_g1_i3	61.8118	713.666	387.739	2.30509	2.30509	0.581128	3.96658	7.29102e-05	0.0130099
TR43541|c0_g1_i9	1.43321	29.4897	15.4615	2.30446	2.30446	0.608102	3.7896	0.00015089	0.0227465
TR52042|c0_g1_i6	53.902	6.08495	29.9935	-2.30386	2.30386	0.537022	-4.29006	1.78624e-05	0.00461725
TR46615|c0_g1_i7	33.2332	244.135	138.684	2.30183	2.30183	0.490742	4.69051	2.72521e-06	0.00107331
TR38856|c0_g1_i1	0	21.2965	10.6483	2.29978	2.29978	0.615134	3.73866	0.000185005	0.0263448
TR36284|c0_g2_i2	0	13.573	6.78652	2.2978	2.2978	0.615916	3.7307	0.000190947	0.0270588
TR41122|c1_g1_i1	0.303204	22.4712	11.3872	2.29774	2.29774	0.616286	3.72836	0.000192727	0.027229
TR37384|c0_g1_i3	14.4011	0	7.20054	-2.29753	2.29753	0.61624	-3.72831	0.000192771	0.027229
TR25131|c0_g1_i1	16.1843	0.702832	8.44358	-2.29469	2.29469	0.606375	-3.78427	0.000154159	0.0231196
TR42625|c0_g2_i16	85.1952	7.12058	46.1579	-2.29136	2.29136	0.584168	-3.92243	8.76613e-05	0.0149992
TR50865|c1_g1_i2	1.70112	33.736	17.7185	2.29076	2.29076	0.608052	3.76738	0.00016497	0.0242014
TR40984|c0_g2_i1	16.0517	0	8.02584	-2.2868	2.2868	0.616087	-3.71181	0.000205784	0.0288804
TR48137|c0_g1_i32	16.415	0	8.20751	-2.2858	2.2858	0.616055	-3.71038	0.000206951	0.0289051
TR41724|c0_g1_i4	15.7704	0	7.8852	-2.28292	2.28292	0.616091	-3.7055	0.000210978	0.0293736
TR40475|c0_g1_i1	13.2637	0	6.63185	-2.2775	2.2775	0.616247	-3.69576	0.000219234	0.0302343
TR48340|c0_g1_i4	27.4528	1.34776	14.4003	-2.2759	2.2759	0.607112	-3.74873	0.000177732	0.025559
TR51144|c0_g2_i23	12.8107	0	6.40535	-2.27557	2.27557	0.616264	-3.69252	0.000222043	0.0305253
TR50932|c0_g1_i2	13.3131	0	6.65653	-2.2727	2.2727	0.616232	-3.68805	0.000225977	0.0308719
TR43981|c0_g1_i4	24.615	144.212	84.4135	2.26994	2.26994	0.385164	5.89346	3.78201e-09	4.52982e-06
TR11020|c0_g1_i1	3.83878	44.8012	24.32	2.26932	2.26932	0.583159	3.89143	9.96546e-05	0.016565
TR49783|c1_g1_i15	0	18.3697	9.18487	2.26125	2.26125	0.614987	3.6769	0.000236083	0.0319441
TR49018|c0_g1_i2	0.887699	18.2749	9.58129	2.25814	2.25814	0.608511	3.71093	0.000206497	0.0288878
TR40436|c0_g4_i4	16.1935	0	8.09677	-2.25548	2.25548	0.615882	-3.6622	0.00025006	0.0335333
TR54182|c0_g1_i1	12.1794	0	6.08968	-2.25477	2.25477	0.616251	-3.65886	0.000253344	0.0338133
TR52850|c0_g2_i14	0	11.1639	5.58193	2.25339	2.25339	0.615932	3.6585	0.000253694	0.0338133
TR52386|c3_g1_i17	0	11.1639	5.58193	2.25339	2.25339	0.615932	3.6585	0.000253694	0.0338133
TR40359|c0_g1_i4	22.0639	136.811	79.4374	2.25324	2.25324	0.430488	5.23414	1.65754e-07	0.00011063	yes
TR46776|c1_g8_i6	0	17.8349	8.91743	2.25037	2.25037	0.614932	3.65955	0.00025266	0.0338133
TR50317|c0_g1_i5	14.6318	0.365892	7.49883	-2.24978	2.24978	0.614318	-3.66224	0.000250015	0.0335333
TR50664|c0_g1_i8	13.5365	0	6.76823	-2.24404	2.24404	0.616098	-3.64234	0.000270173	0.0355223
TR54046|c0_g3_i14	22.8518	0	11.4259	-2.24205	2.24205	0.615024	-3.64547	0.000266902	0.0352513
TR45699|c1_g1_i3	19.7529	0	9.87643	-2.24101	2.24101	0.615348	-3.64185	0.000270683	0.0355359
TR54399|c1_g2_i1	9.40176	145.892	77.6468	2.23771	2.23771	0.605112	3.69801	0.000217295	0.0300617	yes
TR48235|c0_g1_i3	0	14.1559	7.07796	2.23642	2.23642	0.615291	3.63474	0.000278265	0.0364219
TR37980|c0_g1_i4	0	92.382	46.191	2.2353	2.2353	0.61215	3.65155	0.00026066	0.0345311
TR50864|c1_g1_i2	39.0526	3.88005	21.4663	-2.23472	2.23472	0.568157	-3.93327	8.37968e-05	0.0144796
TR50402|c0_g1_i8	15.8671	0	7.93354	-2.23391	2.23391	0.615753	-3.62793	0.000285698	0.0370619
TR54582|c0_g2_i19	12.5903	0	6.29515	-2.23291	2.23291	0.616143	-3.62402	0.00029006	0.037461
TR42928|c0_g1_i2	14.7396	0.382755	7.56117	-2.23282	2.23282	0.614589	-3.63303	0.000280112	0.0365906
TR43680|c1_g1_i2	11.9248	0	5.96242	-2.23048	2.23048	0.616195	-3.61976	0.000294876	0.0378593
TR45602|c0_g1_i5	0	11.4213	5.71063	2.2294	2.2294	0.615693	3.62096	0.000293509	0.0377392
TR51119|c1_g1_i5	30.8344	1.14827	15.9913	-2.22072	2.22072	0.614264	-3.61526	0.00030005	0.0383143
TR46388|c0_g1_i1	0	13.1012	6.55059	2.21934	2.21934	0.615275	3.60707	0.00030967	0.0391267
TR50641|c0_g1_i3	15.4501	0	7.72506	-2.21851	2.21851	0.615674	-3.60338	0.000314101	0.0394585	yes
TR39837|c0_g1_i3	18.1436	0.731783	9.43768	-2.2185	2.2185	0.611759	-3.62644	0.000287359	0.0371973
TR40014|c0_g2_i1	0	10.8269	5.41346	2.21733	2.21733	0.615702	3.60131	0.000316618	0.0395918
TR40814|c0_g1_i1	0	12.0372	6.01862	2.21505	2.21505	0.615431	3.59918	0.000319219	0.0397022
TR47607|c0_g1_i4	14.3267	0.33694	7.33183	-2.21469	2.21469	0.614989	-3.60119	0.000316766	0.0395918
TR48365|c0_g1_i3	208.917	1098.57	653.742	2.21306	2.21306	0.32553	6.79834	1.05832e-11	2.80404e-08
TR45103|c0_g2_i4	44.92	4.13014	24.5251	-2.21217	2.21217	0.58029	-3.81218	0.000137745	0.0210921
TR47856|c0_g1_i14	5.87171	102.92	54.396	2.20667	2.20667	0.610045	3.61723	0.00029777	0.038119	yes
TR27045|c0_g2_i1	0.303204	37.758	19.0306	2.20577	2.20577	0.614692	3.58842	0.000332686	0.0410286
TR33584|c0_g1_i1	79.2463	8.20554	43.7259	-2.20261	2.20261	0.570734	-3.85927	0.000113727	0.0184483	yes
TR46204|c0_g2_i14	13.229	0	6.6145	-2.19864	2.19864	0.615843	-3.57014	0.000356796	0.04357
TR44553|c0_g1_i25	2.64118	53.3313	27.9862	2.19725	2.19725	0.612614	3.58667	0.000334924	0.0411604
TR25261|c0_g3_i1	11.8695	0	5.93473	-2.19714	2.19714	0.616035	-3.56659	0.000361658	0.0438332
TR49005|c0_g1_i1	0	10.9186	5.45928	2.19543	2.19543	0.615469	3.56709	0.000360971	0.0438332
TR44964|c0_g3_i14	17.181	0	8.59051	-2.19517	2.19517	0.615173	-3.56837	0.000359208	0.0437423
TR40238|c0_g1_i2	14.4296	0	7.2148	-2.18742	2.18742	0.615542	-3.55365	0.00037992	0.0455664
TR46109|c0_g1_i1	7.66718	68.3851	38.0261	2.18715	2.18715	0.56292	3.88536	0.000102178	0.0168563	yes
TR28538|c0_g1_i1	0.584494	31.0347	15.8096	2.17532	2.17532	0.616048	3.53109	0.000413845	0.0487657
TR46616|c1_g1_i1	1.7754	77.3133	39.5443	2.17055	2.17055	0.616054	3.52331	0.000426188	0.049884	yes
TR53066|c0_g2_i4	40.8446	2.59497	21.7198	-2.16691	2.16691	0.607088	-3.56935	0.00035787	0.0436402	yes
TR53525|c5_g1_i3	646.036	4361.18	2503.61	2.15845	2.15845	0.505628	4.26884	1.96492e-05	0.00489461	yes
TR47257|c2_g1_i1	2435.9	436.124	1436.01	-2.15263	2.15263	0.417365	-5.15767	2.5004e-07	0.00015505	yes
TR40328|c2_g6_i1	9.9528	57.5425	33.7477	2.14857	2.14857	0.43958	4.88777	1.01985e-06	0.000471797	yes
TR54566|c1_g8_i10	146.771	21.0277	83.8995	-2.14333	2.14333	0.518658	-4.13245	3.5892e-05	0.00761695
TR52361|c2_g1_i2	40.1465	349.467	194.807	2.1369	2.1369	0.568426	3.75933	0.00017037	0.0247761
TR41852|c0_g2_i2	26.8161	3.27363	15.0448	-2.1316	2.1316	0.553174	-3.8534	0.000116487	0.0187661
TR47071|c0_g1_i2	5.40657	50.9571	28.1818	2.13048	2.13048	0.577202	3.69105	0.000223327	0.0305728
TR47715|c0_g1_i2	7.68918	81.3443	44.5168	2.12799	2.12799	0.590243	3.60529	0.00031181	0.0392836
TR10909|c0_g1_i1	8.17924	50.818	29.4986	2.12791	2.12791	0.48173	4.41722	9.99765e-06	0.0029581	yes
TR54866|c8_g1_i2	66.4671	370.904	218.686	2.12432	2.12432	0.431385	4.92442	8.46124e-07	0.000411	yes
TR75787|c0_g1_i1	17.1432	113.152	65.1477	2.12194	2.12194	0.50861	4.17203	3.01897e-05	0.00678563
TR36287|c0_g3_i4	66.2512	517.808	292.03	2.11746	2.11746	0.553457	3.82588	0.000130306	0.0203449	yes
TR46750|c0_g1_i5	6.83795	68.3169	37.5774	2.1159	2.1159	0.586014	3.61066	0.000305414	0.038757
TR55270|c0_g1_i1	256.062	1250.19	753.124	2.11412	2.11412	0.325762	6.48978	8.59591e-11	1.78946e-07
TR46265|c0_g1_i4	14.1466	74.2342	44.1904	2.11123	2.11123	0.392029	5.3854	7.22846e-08	5.74558e-05
TR54638|c4_g4_i1	111.729	20.7155	66.2223	-2.10823	2.10823	0.416925	-5.05662	4.26753e-07	0.000242291	yes
TR47816|c0_g1_i2	42.1333	246.336	144.235	2.1042	2.1042	0.466064	4.51483	6.33685e-06	0.00213921	yes
TR53183|c3_g4_i9	3.47953	32.0522	17.7659	2.10299	2.10299	0.577188	3.64351	0.000268946	0.0354676
TR47257|c0_g1_i1	389.082	67.0897	228.086	-2.09769	2.09769	0.464736	-4.51372	6.37e-06	0.00214213	yes
TR39881|c0_g1_i1	42.1722	304.96	173.566	2.09164	2.09164	0.542193	3.85774	0.00011444	0.0185295
TR53708|c3_g1_i1	25.8826	3.22303	14.5528	-2.08964	2.08964	0.555964	-3.75859	0.000170872	0.0247762
TR40359|c0_g1_i2	64.4754	370.549	217.512	2.0749	2.0749	0.469767	4.41686	1.00144e-05	0.0029581	yes
TR50835|c1_g1_i3	142.007	25.5807	83.7936	-2.07196	2.07196	0.449181	-4.61275	3.97379e-06	0.00145985
TR46980|c0_g1_i1	419.544	77.7522	248.648	-2.07004	2.07004	0.437367	-4.73296	2.21271e-06	0.000916899
TR49375|c0_g1_i1	241.853	40.7146	141.284	-2.06877	2.06877	0.486738	-4.25027	2.13514e-05	0.00521464	yes
TR52156|c1_g1_i1	6.04159	36.582	21.3118	2.06373	2.06373	0.491525	4.19862	2.68542e-05	0.00614651
TR48818|c0_g1_i6	43.5076	6.29717	24.9024	-2.06047	2.06047	0.536266	-3.84225	0.000121909	0.0194153
TR53225|c0_g1_i1	226.517	49.876	138.197	-2.04965	2.04965	0.292741	-7.00159	2.53074e-12	7.90261e-09
TR52566|c0_g1_i17	72.3954	356.645	214.52	2.04671	2.04671	0.38588	5.304	1.13291e-07	8.05325e-05
TR41858|c0_g1_i1	53.4622	234.422	143.942	2.04519	2.04519	0.24431	8.37131	5.69819e-17	3.55868e-13	yes
TR41858|c0_g1_i4	127.089	577.344	352.217	2.03667	2.03667	0.309113	6.58875	4.43554e-11	1.04815e-07	yes
TR52533|c1_g1_i4	21.698	139.413	80.5556	2.03239	2.03239	0.525712	3.86598	0.000110645	0.0179817
TR49183|c0_g2_i1	26.6467	147.511	87.0789	2.03142	2.03142	0.469566	4.32617	1.51725e-05	0.00405686
TR40328|c2_g2_i3	8.45685	45.8088	27.1328	2.02948	2.02948	0.456851	4.44232	8.89951e-06	0.0027207
TR33498|c1_g1_i1	44.5919	263.034	153.813	2.02712	2.02712	0.498617	4.06549	4.79318e-05	0.0095464	yes
TR51678|c4_g1_i2	66.7984	374.302	220.55	2.02572	2.02572	0.477316	4.24398	2.19592e-05	0.00527468
TR43541|c0_g1_i8	3.48806	26.651	15.0695	2.02204	2.02204	0.562665	3.59369	0.000326029	0.0404915
TR53314|c0_g1_i4	170.863	30.9898	100.927	-2.00985	2.00985	0.476455	-4.21835	2.461e-05	0.00570757	yes
TR53314|c0_g1_i1	3424.08	743.085	2083.58	-2.00305	2.00305	0.354744	-5.64648	1.63771e-08	1.62712e-05	yes
TR29319|c0_g1_i1	48.8823	8.67261	28.7775	-1.99636	1.99636	0.487928	-4.0915	4.28586e-05	0.00885444	yes
TR47416|c0_g1_i1	24.9602	123.394	74.1773	1.99208	1.99208	0.422709	4.71264	2.44524e-06	0.000980722
TR47257|c1_g2_i1	1725.93	329.521	1027.73	-1.99176	1.99176	0.457948	-4.34931	1.36566e-05	0.00379063	yes
TR41663|c0_g1_i2	138.498	26.8804	82.6894	-1.98984	1.98984	0.449973	-4.42212	9.77366e-06	0.00292946
TR37516|c1_g1_i1	182.16	34.7884	108.474	-1.98241	1.98241	0.462532	-4.28599	1.81926e-05	0.00466468	yes
TR33515|c0_g1_i1	36.0667	5.5027	20.7847	-1.95786	1.95786	0.546228	-3.58432	0.000337954	0.0413852
TR38324|c1_g1_i1	60.2704	8.98791	34.6292	-1.95742	1.95742	0.552045	-3.54576	0.000391489	0.0468255
TR48741|c0_g3_i1	9.05841	45.2234	27.1409	1.95381	1.95381	0.447498	4.36606	1.26505e-05	0.00355654	yes
TR40359|c0_g1_i3	90.5242	438.806	264.665	1.94954	1.94954	0.432105	4.51173	6.43014e-06	0.00215407
TR38276|c0_g1_i1	784.378	157.648	471.013	-1.94766	1.94766	0.449347	-4.33443	1.46137e-05	0.00394362	yes
TR74958|c0_g1_i1	65.3796	290.691	178.035	1.93783	1.93783	0.369952	5.23805	1.62282e-07	0.000109146
TR52227|c0_g1_i1	55.5418	10.8174	33.1796	-1.92324	1.92324	0.47411	-4.05652	4.98103e-05	0.0098532
TR51397|c0_g1_i1	211.383	50.5297	130.956	-1.92146	1.92146	0.314652	-6.10662	1.01765e-09	1.50809e-06
TR54134|c0_g1_i4	17.0386	85.0039	51.0212	1.91788	1.91788	0.462714	4.14484	3.40047e-05	0.00731723
TR35033|c0_g2_i1	74.1024	341.452	207.777	1.91699	1.91699	0.414654	4.62311	3.78037e-06	0.00140056
TR54015|c4_g3_i5	39.0039	169.165	104.084	1.91406	1.91406	0.363115	5.27124	1.35508e-07	9.32913e-05
TR53711|c1_g1_i3	7.55761	37.1142	22.3359	1.91394	1.91394	0.455334	4.20337	2.62974e-05	0.00606048
TR44027|c0_g1_i11	81.105	14.8148	47.9599	-1.91266	1.91266	0.505669	-3.78243	0.000155302	0.0232511
TR53028|c0_g2_i2	106.742	24.9927	65.8674	-1.90257	1.90257	0.355184	-5.35658	8.48139e-08	6.62109e-05
TR51824|c0_g1_i7	14.0083	62.8629	38.4356	1.89653	1.89653	0.405654	4.67523	2.93619e-06	0.00114608
TR46538|c0_g3_i11	46.7533	9.50334	28.1283	-1.89275	1.89275	0.467843	-4.0457	5.21667e-05	0.0102369
TR50399|c0_g2_i6	86.2211	17.3471	51.7841	-1.88887	1.88887	0.472225	-3.99994	6.33589e-05	0.0118624	yes
TR50613|c0_g2_i1	787.403	189.201	488.302	-1.88446	1.88446	0.342317	-5.50501	3.69148e-08	3.31328e-05
TR46789|c0_g1_i2	36.8583	6.70093	21.7796	-1.8722	1.8722	0.516725	-3.6232	0.00029098	0.0375245
TR45757|c0_g1_i2	7.89611	40.5262	24.2112	1.86525	1.86525	0.497836	3.74672	0.00017916	0.025722
TR54200|c4_g1_i9	10.5087	57.4054	33.957	1.86046	1.86046	0.523407	3.55451	0.000378682	0.0455664
TR29198|c0_g1_i1	18.9229	103.675	61.2989	1.85729	1.85729	0.526258	3.52924	0.000416758	0.0490428	yes
TR48455|c3_g1_i4	308.173	80.8403	194.507	-1.8559	1.8559	0.235068	-7.89518	2.89907e-15	1.33409e-11
TR54478|c4_g1_i6	91.4521	359.289	225.371	1.85095	1.85095	0.298254	6.20596	5.43633e-10	8.96831e-07
TR49165|c0_g1_i1	36.1424	6.85524	21.4988	-1.83926	1.83926	0.515646	-3.56691	0.000361218	0.0438332
TR48576|c0_g4_i2	32.7669	135.169	83.968	1.83541	1.83541	0.373182	4.91826	8.73168e-07	0.000420093
TR48058|c1_g1_i6	18.708	89.1811	53.9445	1.83003	1.83003	0.47912	3.81957	0.000133686	0.020688
TR51374|c0_g2_i4	20.0943	97.4325	58.7634	1.82569	1.82569	0.490698	3.72059	0.000198755	0.0280289
TR36287|c0_g2_i1	8.43008	42.0856	25.2579	1.82463	1.82463	0.502268	3.63277	0.000280391	0.0365906	yes
TR49150|c0_g1_i2	334.307	77.1308	205.719	-1.82458	1.82458	0.424263	-4.30058	1.7035e-05	0.00444609	yes
TR51523|c0_g2_i1	183.043	40.1858	111.615	-1.82243	1.82243	0.457546	-3.98306	6.8035e-05	0.0124447
TR74563|c0_g1_i1	955.279	3877.44	2416.36	1.82153	1.82153	0.367558	4.95576	7.20484e-07	0.000362039	yes
TR41241|c4_g1_i2	12.6256	59.4817	36.0537	1.81575	1.81575	0.480597	3.7781	0.000158027	0.0234982
TR52594|c1_g1_i5	57.6278	12.9427	35.2853	-1.79404	1.79404	0.455763	-3.93636	8.27278e-05	0.0143516
TR43807|c0_g1_i1	44.3361	9.79446	27.0653	-1.79295	1.79295	0.467047	-3.83891	0.000123582	0.0196459
TR35159|c0_g1_i1	158.22	590.989	374.605	1.78913	1.78913	0.289216	6.18613	6.16576e-10	9.80177e-07
TR9711|c0_g1_i2	17.1834	67.5559	42.3697	1.7857	1.7857	0.363179	4.91685	8.79459e-07	0.000420189
TR49637|c0_g1_i10	490.14	133.755	311.947	-1.7845	1.7845	0.263992	-6.75969	1.38292e-11	3.55629e-08
TR53096|c0_g1_i1	321.809	85.0353	203.422	-1.78385	1.78385	0.317633	-5.61609	1.95322e-08	1.89753e-05	yes
TR52081|c0_g1_i7	120.598	27.4054	74.0015	-1.77739	1.77739	0.456905	-3.89006	0.000100221	0.0166275
TR41020|c0_g1_i2	182.731	666.67	424.7	1.77416	1.77416	0.269088	6.59323	4.30347e-11	1.04519e-07	yes
TR53925|c0_g3_i10	41.4557	9.74133	25.5985	-1.77288	1.77288	0.438239	-4.04547	5.22185e-05	0.0102369
TR47220|c0_g1_i11	690.266	186.109	438.188	-1.77284	1.77284	0.29775	-5.95412	2.61471e-09	3.41216e-06	yes
TR50743|c0_g1_i1	724.766	194.745	459.756	-1.76813	1.76813	0.307491	-5.75018	8.91478e-09	9.50554e-06	yes
TR48391|c0_g1_i6	259.949	63.4521	161.7	-1.76516	1.76516	0.416254	-4.24058	2.22943e-05	0.00534048
TR50509|c0_g1_i1	615.672	148.088	381.88	-1.74843	1.74843	0.439131	-3.98157	6.84609e-05	0.0124957	yes
TR52050|c1_g4_i1	37.6668	146.72	92.1935	1.73105	1.73105	0.397488	4.35498	1.33077e-05	0.00370557
TR37619|c0_g1_i7	154.929	38.4709	96.6999	-1.72307	1.72307	0.431337	-3.99472	6.47701e-05	0.0120749
TR49883|c0_g1_i3	50.5525	12.5695	31.561	-1.71705	1.71705	0.430066	-3.99252	6.53741e-05	0.0120844
TR51756|c3_g2_i4	614.627	2363.44	1489.03	1.71643	1.71643	0.395471	4.34022	1.42338e-05	0.00386496	yes
TR45253|c0_g1_i6	18.1636	70.4855	44.3246	1.69863	1.69863	0.417336	4.07017	4.69794e-05	0.00942576
TR43872|c0_g4_i3	55.3668	229.37	142.368	1.69601	1.69601	0.464338	3.65253	0.00025967	0.0344522
TR54015|c4_g3_i3	19.7114	83.1554	51.4334	1.69508	1.69508	0.476041	3.56078	0.000369755	0.0446535
TR49829|c0_g5_i2	17.0756	71.2514	44.1635	1.69504	1.69504	0.470365	3.60367	0.000313749	0.0394585
TR51268|c0_g2_i2	199.673	56.1988	127.936	-1.68609	1.68609	0.333121	-5.06148	4.16018e-07	0.000238947	yes
TR53826|c0_g1_i2	12.1155	49.1063	30.6109	1.68243	1.68243	0.455828	3.69093	0.000223437	0.0305728
TR53475|c0_g1_i1	29.4858	106.823	68.1543	1.68156	1.68156	0.362225	4.6423	3.44553e-06	0.00129295
TR52320|c2_g1_i1	39.3911	156.088	97.7397	1.67081	1.67081	0.450227	3.71105	0.000206404	0.0288878
TR41858|c0_g1_i2	144.254	500.551	322.403	1.66755	1.66755	0.316764	5.26434	1.40693e-07	9.61045e-05	yes
TR53317|c0_g1_i1	41.0923	10.5021	25.7972	-1.66247	1.66247	0.444483	-3.74023	0.000183854	0.0262253
TR49830|c2_g6_i1	80.3396	287.58	183.96	1.66088	1.66088	0.363835	4.56493	4.99651e-06	0.00174746
TR54059|c0_g1_i11	626.909	190.291	408.6	-1.66087	1.66087	0.224453	-7.39963	1.36569e-13	4.97531e-10
TR48838|c2_g1_i1	168.717	45.4648	107.091	-1.65932	1.65932	0.403733	-4.10993	3.95774e-05	0.0083183
TR37165|c0_g1_i1	3586.88	910.385	2248.63	-1.65142	1.65142	0.457085	-3.61293	0.000302756	0.0385878	yes
TR2419|c0_g1_i1	69.5888	18.4044	43.9966	-1.65034	1.65034	0.425648	-3.87725	0.000105645	0.0172654
TR45707|c0_g1_i5	249.51	954.812	602.161	1.64992	1.64992	0.437119	3.77454	0.000160303	0.0237156	yes
TR37626|c0_g1_i5	20.66	78.5801	49.62	1.64835	1.64835	0.433809	3.7997	0.000144871	0.022029	yes
TR41858|c0_g1_i3	1487.84	5341.28	3414.56	1.64719	1.64719	0.380308	4.33121	1.48295e-05	0.0039773	yes
TR29398|c0_g1_i1	152.994	42.3936	97.6938	-1.64581	1.64581	0.387484	-4.24742	2.16249e-05	0.00524855	yes
TR43400|c0_g1_i8	265.022	75.1193	170.071	-1.64026	1.64026	0.36793	-4.45807	8.27022e-06	0.00259487
TR41285|c0_g1_i1	126.581	473.428	300.004	1.63044	1.63044	0.431643	3.77729	0.000158542	0.0235153
TR54761|c2_g1_i1	30.5343	113.468	72.0012	1.62244	1.62244	0.430986	3.76449	0.00016689	0.024442
TR35803|c0_g1_i1	22.2228	79.156	50.6894	1.61766	1.61766	0.396809	4.07667	4.5686e-05	0.009268	yes
TR44214|c0_g1_i1	156.719	44.0983	100.409	-1.61752	1.61752	0.395218	-4.09274	4.26303e-05	0.00885353
TR48354|c0_g1_i4	81.706	272.916	177.311	1.61308	1.61308	0.319806	5.04393	4.56058e-07	0.000255609
TR52975|c0_g1_i5	72.8946	245.804	159.349	1.61196	1.61196	0.33733	4.77859	1.76532e-06	0.00076034	yes
TR47632|c3_g5_i3	38.5076	136.773	87.6402	1.60643	1.60643	0.400484	4.01121	6.04078e-05	0.0114736
TR51896|c0_g1_i6	12.208	43.8521	28.03	1.60548	1.60548	0.411724	3.89941	9.64285e-05	0.0162137
TR47968|c0_g1_i2	290.492	1061.74	676.115	1.60532	1.60532	0.429207	3.74021	0.000183865	0.0262253	yes
TR47115|c0_g1_i1	544.781	164.956	354.868	-1.60494	1.60494	0.312719	-5.13221	2.86361e-07	0.000172674	yes
TR54866|c8_g5_i8	22.4853	78.0579	50.2716	1.60374	1.60374	0.377835	4.24455	2.1903e-05	0.00527468	yes
TR41934|c0_g2_i7	105.134	349.581	227.358	1.5996	1.5996	0.328552	4.86864	1.12368e-06	0.000511707
TR51173|c0_g1_i1	86.2544	23.6739	54.9641	-1.58939	1.58939	0.437562	-3.63237	0.00028083	0.0365933
TR27792|c0_g3_i1	29.1065	102.03	65.5684	1.58838	1.58838	0.401164	3.95943	7.51303e-05	0.0131907	yes
TR45939|c0_g1_i1	53.8354	15.581	34.7082	-1.57725	1.57725	0.398081	-3.96212	7.42868e-05	0.0131748
TR47082|c0_g1_i2	265.405	80.8228	173.114	-1.57332	1.57332	0.338022	-4.65448	3.24796e-06	0.0012401	yes
TR46734|c2_g2_i1	180.757	601.857	391.307	1.56984	1.56984	0.361692	4.34027	1.42311e-05	0.00386496	yes
TR54761|c2_g1_i2	26.3716	93.4385	59.9051	1.56215	1.56215	0.432547	3.61151	0.000304419	0.0387431	yes
TR44225|c0_g1_i1	311.831	1035.04	673.435	1.55941	1.55941	0.368358	4.23341	2.30173e-05	0.00545392
TR44386|c0_g1_i13	59.6478	199.33	129.489	1.55765	1.55765	0.377273	4.12869	3.64828e-05	0.00770493
TR41127|c0_g3_i1	398.774	121.34	260.057	-1.55664	1.55664	0.359198	-4.33367	1.46646e-05	0.00394519	yes
TR53335|c0_g1_i16	83.0995	24.4852	53.7923	-1.55568	1.55568	0.399135	-3.89762	9.71413e-05	0.0163022
TR51952|c0_g1_i3	154.398	48.8972	101.648	-1.55475	1.55475	0.300829	-5.16822	2.36333e-07	0.000148658
TR45321|c0_g1_i11	102.969	29.7121	66.3405	-1.55383	1.55383	0.416173	-3.73361	0.000188752	0.0267911
TR53981|c0_g1_i10	33.7885	115.959	74.8739	1.55165	1.55165	0.412358	3.76288	0.000167968	0.0245587
TR53880|c0_g2_i6	20.8262	69.5953	45.2107	1.5445	1.5445	0.387469	3.98612	6.71633e-05	0.012311
TR16679|c0_g1_i1	5129.43	17758.4	11443.9	1.5387	1.5387	0.428798	3.58841	0.0003327	0.0410286	yes
TR50430|c0_g1_i2	64.1632	206.363	135.263	1.53468	1.53468	0.351037	4.37185	1.23196e-05	0.00348594
TR52455|c0_g3_i1	68.4967	229.651	149.074	1.53256	1.53256	0.402359	3.80893	0.000139572	0.0212972
TR45445|c0_g1_i3	99.3838	30.965	65.1744	-1.52762	1.52762	0.358446	-4.26179	2.02793e-05	0.00500877
TR54742|c1_g2_i2	108.09	33.5883	70.8389	-1.52735	1.52735	0.358972	-4.25479	2.09241e-05	0.00513898
TR51857|c0_g1_i4	134.32	40.9475	87.6335	-1.52561	1.52561	0.387316	-3.93893	8.18456e-05	0.0142268
TR28527|c0_g1_i1	3031.43	1004.25	2017.84	-1.51114	1.51114	0.273473	-5.52575	3.2808e-08	3.01951e-05	yes
TR39603|c0_g1_i2	132.191	39.8833	86.0373	-1.50789	1.50789	0.407262	-3.70252	0.000213471	0.0296735
TR53866|c1_g1_i16	73.2485	240.448	156.848	1.50432	1.50432	0.404424	3.71965	0.000199497	0.0280883
TR53773|c0_g2_i8	151.765	46.1419	98.9537	-1.50157	1.50157	0.405798	-3.70029	0.000215349	0.0298871
TR54249|c2_g2_i5	87.5343	276.276	181.905	1.49843	1.49843	0.364668	4.10904	3.97312e-05	0.00833059	yes
TR54468|c0_g1_i6	91.253	28.1932	59.7231	-1.49715	1.49715	0.391463	-3.8245	0.000131036	0.0203861
TR42633|c0_g1_i1	153.002	46.9777	99.9897	-1.49372	1.49372	0.406216	-3.67715	0.000235854	0.0319441
TR50546|c0_g1_i1	375.582	1175.48	775.532	1.49235	1.49235	0.358671	4.16076	3.17184e-05	0.00698555
TR47513|c0_g1_i2	42.0152	12.6901	27.3527	-1.49135	1.49135	0.422943	-3.52611	0.000421705	0.0494255
TR45722|c0_g1_i2	66.2668	20.4846	43.3757	-1.48193	1.48193	0.409923	-3.61515	0.000300173	0.0383143
TR49303|c0_g1_i1	66.2758	205.771	136.024	1.47257	1.47257	0.368742	3.9935	6.51038e-05	0.0120844
TR42897|c0_g2_i1	14.3219	46.3233	30.3226	1.4714	1.4714	0.417271	3.52624	0.000421502	0.0494255
TR52702|c1_g1_i1	8911.07	2913.01	5912.04	-1.46972	1.46972	0.350692	-4.19091	2.77832e-05	0.00629326	yes
TR54866|c8_g4_i1	35.581	110.404	72.9924	1.46932	1.46932	0.370578	3.96493	7.34188e-05	0.0130739	yes
TR53785|c0_g1_i4	171.956	58.2189	115.088	-1.46901	1.46901	0.290604	-5.05504	4.30305e-07	0.000242731
TR35865|c0_g1_i1	42.0713	133.76	87.9156	1.46072	1.46072	0.40753	3.58432	0.000337958	0.0413852	yes
TR46734|c1_g2_i1	20.8384	66.0789	43.4587	1.45762	1.45762	0.404159	3.60655	0.000310299	0.0391496
TR64949|c0_g1_i1	442.737	1287.87	865.303	1.45651	1.45651	0.280021	5.20142	1.97768e-07	0.000128086	yes
TR52305|c0_g3_i5	117.694	345.168	231.431	1.45428	1.45428	0.300156	4.84508	1.26562e-06	0.000570403	yes
TR33293|c0_g1_i1	28.6523	86.2953	57.4738	1.45294	1.45294	0.348248	4.17215	3.0174e-05	0.00678563
TR48209|c0_g1_i2	229.438	74.6189	152.029	-1.45233	1.45233	0.37347	-3.88875	0.000100762	0.0166856
TR50760|c0_g2_i3	784.506	255.021	519.764	-1.45102	1.45102	0.378038	-3.83829	0.000123895	0.0196599	yes
TR39267|c0_g1_i1	160.457	54.8953	107.676	-1.45084	1.45084	0.297456	-4.87749	1.07444e-06	0.000491844
TR45159|c0_g1_i2	65.7913	196.678	131.235	1.44952	1.44952	0.339318	4.27187	1.93838e-05	0.00488415
TR50658|c0_g2_i3	358.213	1100.76	729.488	1.44655	1.44655	0.380843	3.79828	0.000145702	0.0220785
TR52398|c1_g1_i1	55.9615	17.8648	36.9131	-1.44567	1.44567	0.399087	-3.62245	0.000291829	0.0375785
TR49561|c0_g1_i6	226.978	78.3424	152.66	-1.4396	1.4396	0.297579	-4.83771	1.31345e-06	0.00058592
TR48822|c0_g1_i14	22.6588	69.7595	46.2091	1.43681	1.43681	0.390268	3.6816	0.000231774	0.0315245
TR45479|c0_g1_i1	80.3511	26.4941	53.4226	-1.43121	1.43121	0.375081	-3.81574	0.000135774	0.0208268
TR54613|c1_g6_i1	199.431	585.381	392.406	1.41926	1.41926	0.346609	4.09469	4.22726e-05	0.00882116
TR52124|c1_g1_i1	150.521	444.566	297.543	1.41885	1.41885	0.356577	3.97909	6.91804e-05	0.0125135	yes
TR37955|c0_g1_i1	1148.22	378.597	763.408	-1.41667	1.41667	0.393285	-3.60214	0.000315606	0.0395907
TR52050|c1_g1_i2	40.8907	119.056	79.9734	1.41546	1.41546	0.340269	4.15983	3.1849e-05	0.0069967	yes
TR47133|c0_g1_i2	651.233	233.765	442.499	-1.40808	1.40808	0.261235	-5.39007	7.04304e-08	5.64955e-05
TR53461|c0_g1_i3	130.865	46.2879	88.5766	-1.40522	1.40522	0.300318	-4.67911	2.88122e-06	0.00112967
TR41407|c0_g1_i1	41.0052	118.605	79.8052	1.4037	1.4037	0.343178	4.09029	4.30826e-05	0.00886326
TR52145|c1_g2_i2	1469.18	515.614	992.398	-1.39887	1.39887	0.321889	-4.3458	1.38769e-05	0.00381544	yes
TR44070|c0_g1_i5	36.009	106.186	71.0974	1.39394	1.39394	0.377356	3.69395	0.000220795	0.0304016
TR54595|c1_g2_i6	99.0404	34.3265	66.6834	-1.39305	1.39305	0.346058	-4.02548	5.68599e-05	0.0109264
TR51725|c0_g2_i4	927.243	333.014	630.129	-1.39217	1.39217	0.28853	-4.82504	1.39975e-06	0.000621246
TR48838|c2_g1_i2	588.631	207.709	398.17	-1.38845	1.38845	0.326928	-4.24695	2.16704e-05	0.00524855	yes
TR52797|c1_g1_i3	266.186	94.7016	180.444	-1.38565	1.38565	0.316066	-4.38406	1.16485e-05	0.0033613	yes
TR51246|c0_g1_i6	130.388	45.5663	87.977	-1.38529	1.38529	0.349617	-3.96231	7.42295e-05	0.0131748
TR45472|c0_g3_i5	40.5631	113.139	76.8509	1.3825	1.3825	0.304258	4.54383	5.52401e-06	0.00190904
TR50655|c0_g3_i1	131.295	360.691	245.993	1.38134	1.38134	0.276935	4.98795	6.1022e-07	0.000327325
TR5918|c0_g1_i1	382.215	138.999	260.607	-1.38026	1.38026	0.279917	-4.93097	8.18216e-07	0.00040191	yes
TR48085|c0_g1_i1	123.926	346.727	235.326	1.37942	1.37942	0.316628	4.3566	1.32097e-05	0.00369002	yes
TR44896|c0_g3_i11	27.3043	76.9867	52.1455	1.37697	1.37697	0.333083	4.13402	3.56469e-05	0.00760184
TR54613|c1_g21_i1	61.1762	174.102	117.639	1.37488	1.37488	0.35227	3.90292	9.50383e-05	0.0161038
TR50760|c0_g2_i4	561.511	209.385	385.448	-1.37011	1.37011	0.232848	-5.88413	4.00159e-09	4.72805e-06	yes
TR54237|c3_g2_i8	208.973	72.5794	140.776	-1.36868	1.36868	0.375761	-3.6424	0.000270103	0.0355223
TR44233|c0_g2_i5	25.8644	72.2189	49.0416	1.36786	1.36786	0.327248	4.17991	2.9163e-05	0.00658872
TR48602|c0_g1_i3	156.901	55.035	105.968	-1.36169	1.36169	0.368324	-3.69699	0.000218174	0.0301355
TR54499|c0_g1_i1	275.868	96.1413	186.005	-1.35816	1.35816	0.38264	-3.54946	0.000386029	0.0462357
TR49637|c0_g1_i1	178.677	64.3535	121.515	-1.3532	1.3532	0.339346	-3.98768	6.67229e-05	0.012256
TR54297|c0_g1_i4	29.174	80.6825	54.9283	1.35203	1.35203	0.332743	4.0633	4.83846e-05	0.00961467
TR52978|c1_g1_i7	405.003	1092.9	748.953	1.35131	1.35131	0.284999	4.74145	2.12191e-06	0.000891959	yes
TR52050|c1_g5_i2	123.609	330.81	227.21	1.3481	1.3481	0.27074	4.97931	6.38125e-07	0.000336108	yes
TR44199|c0_g1_i1	51.244	141.091	96.1674	1.34618	1.34618	0.333057	4.0419	5.30205e-05	0.0103372
TR41925|c0_g1_i2	323.444	117.717	220.581	-1.33665	1.33665	0.341868	-3.90986	9.23493e-05	0.0156786	yes
TR30388|c0_g1_i1	139.848	378.839	259.343	1.3358	1.3358	0.316314	4.22303	2.4104e-05	0.00565016	yes
TR50847|c0_g1_i3	39.251	108.36	73.8056	1.32526	1.32526	0.360228	3.67895	0.000234197	0.0317963
TR44281|c0_g1_i4	55.9437	152.795	104.369	1.32446	1.32446	0.348618	3.79919	0.000145171	0.0220363	yes
TR49561|c0_g1_i3	707.544	268.488	488.016	-1.31982	1.31982	0.284288	-4.64256	3.44125e-06	0.00129295
TR36403|c0_g1_i1	154.191	57.5501	105.871	-1.31558	1.31558	0.323027	-4.07266	4.64787e-05	0.00936364
TR48852|c1_g2_i2	74.2627	27.1661	50.7144	-1.31335	1.31335	0.36218	-3.62623	0.000287593	0.0371973
TR52365|c1_g1_i1	431.515	166.284	298.9	-1.31176	1.31176	0.257661	-5.09105	3.56086e-07	0.000211796
TR54478|c4_g1_i3	115.487	309.459	212.473	1.31166	1.31166	0.329542	3.98026	6.8839e-05	0.0125132
TR54753|c1_g2_i5	128.561	47.5129	88.0371	-1.30916	1.30916	0.34799	-3.76207	0.000168511	0.024597
TR44233|c0_g2_i3	89.026	232.204	160.615	1.30451	1.30451	0.287285	4.54082	5.60358e-06	0.00192891
TR53145|c3_g1_i2	116.387	44.4416	80.4143	-1.29953	1.29953	0.302952	-4.28957	1.79021e-05	0.00461725
TR47082|c0_g1_i1	451.603	174.954	313.278	-1.2887	1.2887	0.28848	-4.4672	7.92496e-06	0.00253814
TR42149|c0_g2_i6	40.5497	107.59	74.0696	1.28438	1.28438	0.350503	3.6644	0.000247915	0.033348
TR44329|c0_g2_i1	325.993	858.964	592.479	1.28219	1.28219	0.339794	3.77341	0.000161028	0.0237827
TR52124|c1_g1_i5	168.217	437.399	302.808	1.27791	1.27791	0.321953	3.96925	7.21006e-05	0.0128917	yes
TR48391|c0_g1_i9	145.158	55.5492	100.354	-1.27439	1.27439	0.333073	-3.82616	0.000130159	0.0203449
TR40082|c0_g1_i2	390.274	991.092	690.683	1.27118	1.27118	0.280707	4.5285	5.94038e-06	0.00202887
TR39617|c0_g1_i1	278.962	107.667	193.314	-1.27093	1.27093	0.325682	-3.90235	9.52618e-05	0.0161105
TR47332|c0_g1_i5	59.7179	155.691	107.704	1.26889	1.26889	0.33985	3.73369	0.000188696	0.0267911
TR52644|c0_g1_i3	523.093	203.889	363.491	-1.26822	1.26822	0.308967	-4.10472	4.048e-05	0.00846729	yes
TR40286|c0_g1_i10	75.4968	192.477	133.987	1.26724	1.26724	0.297162	4.26447	2.00381e-05	0.00497731
TR49637|c0_g1_i7	617.96	244.122	431.041	-1.26292	1.26292	0.286247	-4.41198	1.02431e-05	0.0029953
TR36476|c0_g1_i1	118.834	46.0786	82.4562	-1.26184	1.26184	0.329216	-3.83286	0.000126664	0.0199906	yes
TR48949|c0_g1_i5	45.3845	116.92	81.1524	1.25871	1.25871	0.333035	3.77953	0.000157128	0.0234442
TR46659|c0_g1_i5	71.0133	182.122	126.567	1.25453	1.25453	0.330537	3.79544	0.000147381	0.0222558	yes
TR51156|c1_g1_i1	8189.9	3297.11	5743.5	-1.25384	1.25384	0.255079	-4.91549	8.85605e-07	0.000420826	yes
TR26989|c1_g1_i1	105.061	40.9901	73.0257	-1.25311	1.25311	0.331546	-3.77958	0.000157094	0.0234442
TR51268|c0_g2_i3	254.939	101.549	178.244	-1.24902	1.24902	0.295177	-4.23141	2.32234e-05	0.00548788	yes
TR37188|c0_g1_i1	48.7296	122.716	85.7228	1.24897	1.24897	0.301395	4.14398	3.41324e-05	0.00731723
TR48885|c0_g1_i2	113.05	44.6074	78.8289	-1.24842	1.24842	0.310423	-4.02169	5.77815e-05	0.0110475
TR51722|c1_g1_i1	258.14	103.31	180.725	-1.24786	1.24786	0.279928	-4.45781	8.28016e-06	0.00259487
TR54638|c4_g4_i2	808.284	322.801	565.542	-1.24627	1.24627	0.290692	-4.28724	1.80909e-05	0.00465225	yes
TR35009|c0_g1_i1	226.999	566.421	396.71	1.24581	1.24581	0.282287	4.41329	1.01812e-05	0.00298771
TR54272|c1_g1_i3	53.934	134.099	94.0166	1.24346	1.24346	0.280115	4.4391	9.03353e-06	0.00275205
TR53823|c0_g7_i1	167.792	427.332	297.562	1.24301	1.24301	0.331833	3.74587	0.000179767	0.0257668
TR49561|c0_g1_i4	984.576	394.516	689.546	-1.23964	1.23964	0.294777	-4.20536	2.60668e-05	0.00602944
TR52346|c3_g1_i3	153.543	60.7315	107.137	-1.23883	1.23883	0.327361	-3.78428	0.000154156	0.0231196
TR43964|c0_g1_i1	61.1231	154.287	107.705	1.2387	1.2387	0.322125	3.84541	0.00012035	0.019237
TR52644|c0_g1_i4	1649.81	670.808	1160.31	-1.23689	1.23689	0.262081	-4.71947	2.36454e-06	0.000961589	yes
TR49459|c0_g2_i10	207.922	81.6526	144.787	-1.23429	1.23429	0.343529	-3.59298	0.000326923	0.0405346
TR49159|c0_g1_i1	83.8972	213.249	148.573	1.22854	1.22854	0.347482	3.53556	0.000406911	0.0481432
TR51130|c2_g7_i1	99.3374	39.895	69.6162	-1.22695	1.22695	0.312384	-3.92771	8.57584e-05	0.0147893
TR54866|c8_g5_i5	93.0355	231.792	162.414	1.20821	1.20821	0.33911	3.5629	0.000366778	0.0443553
TR50511|c2_g2_i4	116.075	46.9863	81.5308	-1.20061	1.20061	0.337217	-3.56036	0.000370353	0.0446641
TR43858|c0_g1_i3	283.285	684.855	484.07	1.20011	1.20011	0.288431	4.16082	3.17113e-05	0.00698555
TR54583|c0_g1_i14	81.1865	196.184	138.685	1.19713	1.19713	0.294836	4.06033	4.90026e-05	0.0097154
TR54069|c2_g2_i1	118.874	48.9405	83.9073	-1.19681	1.19681	0.307178	-3.89615	9.77353e-05	0.0163527
TR50575|c1_g2_i2	171.269	410.407	290.838	1.19477	1.19477	0.274902	4.34618	1.3853e-05	0.00381544
TR54149|c1_g4_i9	535.846	220.576	378.211	-1.18656	1.18656	0.321818	-3.68706	0.000226856	0.0309437	yes
TR29737|c0_g1_i1	146.141	59.918	103.029	-1.18386	1.18386	0.330881	-3.57791	0.000346347	0.0423531
TR52305|c0_g3_i4	126.248	306.32	216.284	1.1809	1.1809	0.32924	3.58674	0.000334835	0.0411604	yes
TR47742|c0_g1_i9	496.266	207.584	351.925	-1.17797	1.17797	0.300799	-3.91615	8.99727e-05	0.0153646	yes
TR50743|c0_g1_i2	139.961	58.4706	99.216	-1.17735	1.17735	0.307218	-3.8323	0.000126953	0.0199921	yes
TR38691|c0_g1_i1	158.227	66.9899	112.609	-1.17335	1.17335	0.272582	-4.30458	1.67304e-05	0.00439282
TR49572|c0_g1_i5	55.9273	131.578	93.7525	1.16291	1.16291	0.288197	4.03512	5.45737e-05	0.0105101
TR29545|c0_g1_i1	266.076	112.64	189.358	-1.15766	1.15766	0.305889	-3.78458	0.000153967	0.0231196	yes
TR46651|c1_g1_i16	68.6765	161.92	115.298	1.15462	1.15462	0.31124	3.70973	0.000207482	0.0289329
TR54433|c0_g1_i8	244.019	105.525	174.772	-1.15461	1.15461	0.254648	-4.53415	5.78368e-06	0.0019831
TR52978|c1_g1_i10	287.801	675.636	481.719	1.15098	1.15098	0.305089	3.77259	0.000161562	0.0238213	yes
TR52608|c0_g1_i18	235.589	100.262	167.926	-1.149	1.149	0.312097	-3.68153	0.000231835	0.0315245
TR49488|c0_g1_i1	86.498	36.594	61.546	-1.14807	1.14807	0.319559	-3.59267	0.000327303	0.0405346
TR36843|c0_g1_i3	193.148	454.228	323.688	1.14424	1.14424	0.319044	3.58647	0.000335181	0.0411604
TR51662|c1_g1_i5	199.738	87.8047	143.771	-1.14405	1.14405	0.228562	-5.00542	5.57394e-07	0.000300835
TR52025|c1_g3_i3	302.867	133.521	218.194	-1.14044	1.14044	0.229378	-4.9719	6.63011e-07	0.000340825
TR25698|c0_g1_i1	388.66	169.119	278.889	-1.13919	1.13919	0.271072	-4.20253	2.63944e-05	0.00606048	yes
TR52145|c1_g2_i1	864.89	377.231	621.06	-1.12829	1.12829	0.285962	-3.9456	7.95993e-05	0.0138916	yes
TR48906|c1_g1_i1	201.907	87.7171	144.812	-1.11947	1.11947	0.315899	-3.54377	0.000394453	0.0471156
TR51268|c0_g4_i1	747.451	334.75	541.1	-1.11859	1.11859	0.227101	-4.92554	8.41292e-07	0.000410936	yes
TR42211|c0_g1_i4	68.089	154.558	111.323	1.10529	1.10529	0.306086	3.61105	0.000304964	0.0387561
TR50422|c0_g3_i14	135.811	59.8489	97.83	-1.10446	1.10446	0.306012	-3.60921	0.000307125	0.0388613
TR53199|c0_g1_i2	99.6583	44.0057	71.832	-1.10422	1.10422	0.301241	-3.66558	0.00024678	0.0332465
TR41713|c0_g1_i1	56.2628	127.319	91.7909	1.0984	1.0984	0.307989	3.56637	0.00036196	0.0438332
TR50743|c0_g1_i3	2393.85	1085.88	1739.87	-1.09689	1.09689	0.236251	-4.64292	3.43519e-06	0.00129295	yes
TR54401|c0_g1_i2	655.864	300.942	478.403	-1.08956	1.08956	0.214539	-5.07862	3.8018e-07	0.000221605	yes
TR52301|c0_g1_i3	258.303	571.439	414.871	1.08769	1.08769	0.27079	4.01674	5.90097e-05	0.0112406	yes
TR32548|c0_g1_i1	485.696	222.714	354.205	-1.08181	1.08181	0.237245	-4.55991	5.11763e-06	0.00177561	yes
TR28476|c0_g2_i1	640.318	297.059	468.689	-1.08148	1.08148	0.188611	-5.73394	9.81225e-09	1.02134e-05
TR42412|c1_g2_i1	315.991	144.978	230.485	-1.07998	1.07998	0.241944	-4.46375	8.05383e-06	0.00255177
TR40251|c0_g1_i2	280.481	128.71	204.595	-1.07952	1.07952	0.244198	-4.42068	9.83908e-06	0.00293608
TR32160|c0_g2_i1	123.093	268.359	195.726	1.07836	1.07836	0.243129	4.43532	9.19355e-06	0.00278387	yes
TR36566|c0_g1_i1	3273.88	1498.59	2386.23	-1.07161	1.07161	0.267616	-4.00429	6.22031e-05	0.0117213
TR46442|c0_g1_i3	77.9037	171.06	124.482	1.0693	1.0693	0.289694	3.69115	0.000223245	0.0305728
TR54149|c1_g4_i4	224.273	102.968	163.621	-1.06898	1.06898	0.268662	-3.97891	6.92315e-05	0.0125135
TR32852|c0_g1_i2	227.395	105.179	166.287	-1.06736	1.06736	0.245654	-4.34497	1.39295e-05	0.0038179
TR54289|c1_g5_i2	300.038	137.539	218.789	-1.06671	1.06671	0.274773	-3.88214	0.00010354	0.0170168
TR53905|c0_g1_i18	72.7375	158.456	115.597	1.06215	1.06215	0.283011	3.75302	0.000174717	0.0252083
TR53559|c3_g1_i3	669.218	309.065	489.141	-1.05703	1.05703	0.272494	-3.87908	0.000104852	0.0171679
TR29546|c1_g1_i1	5969.43	2807.03	4388.23	-1.05214	1.05214	0.221875	-4.74204	2.11574e-06	0.000891959
TR46192|c0_g1_i2	234.029	495.856	364.943	1.0433	1.0433	0.231897	4.49896	6.82861e-06	0.00227883	yes
TR32777|c0_g1_i2	58.5502	126.074	92.3119	1.04123	1.04123	0.289263	3.59958	0.000318729	0.0396977
TR50743|c0_g1_i4	1359.99	637.414	998.701	-1.03737	1.03737	0.271806	-3.81658	0.000135315	0.0208126	yes
TR53868|c0_g4_i1	237.433	506.589	372.011	1.03633	1.03633	0.27203	3.80962	0.000139178	0.0212744
TR49718|c0_g1_i9	148.12	313.257	230.688	1.03562	1.03562	0.248414	4.16894	3.06015e-05	0.00684887
TR54056|c0_g1_i21	208.832	97.6917	153.262	-1.03487	1.03487	0.285928	-3.61934	0.000295352	0.0378648
TR53259|c1_g1_i26	73.9481	158.543	116.245	1.03336	1.03336	0.292272	3.53561	0.000406833	0.0481432
TR52044|c3_g5_i4	238.969	114.015	176.492	-1.03307	1.03307	0.218647	-4.72481	2.30327e-06	0.000941046
TR28998|c0_g1_i2	444.76	213.379	329.069	-1.01649	1.01649	0.244429	-4.15861	3.20185e-05	0.00701631
TR51748|c1_g5_i4	98.5696	208.07	153.32	1.01551	1.01551	0.287526	3.53188	0.000412622	0.0486872
TR46114|c0_g1_i6	915.028	437.499	676.263	-1.01421	1.01421	0.26168	-3.87578	0.000106283	0.0173372
TR32165|c0_g1_i1	283.171	136.024	209.597	-1.01224	1.01224	0.248048	-4.08084	4.48728e-05	0.0091242
TR48949|c0_g1_i1	239.331	501.976	370.654	1.00714	1.00714	0.285611	3.52625	0.000421497	0.0494255
TR50058|c1_g1_i5	92.0757	192.662	142.369	1.00665	1.00665	0.283252	3.5539	0.000379569	0.0455664
TR55286|c0_g1_i1	118.053	244.189	181.121	1.00074	1.00074	0.258492	3.87147	0.000108183	0.0176143
TR38687|c0_g1_i2	249.241	119.665	184.453	-1.00015	1.00015	0.281423	-3.55389	0.000379572	0.0455664

## Sheet: Table S2
Table S2. Results for the transcript differential expression analysis of 'Star Ruby' plants. Transcripts were considered to be differentially regulated as a result of infection if a |log2 fold change|>=1 and padj<=0.05 were observed.
id	baseMeanA	baseMeanB	baseMean	log2FoldChange	|log2FoldChange|	lfcSE	stat	pvalue	padj	across-variety
TR44446|c0_g1_i6	0	177.261	88.6307	5.81434	5.81434	0.541803	10.7315	7.24316e-27	1.12297e-22
TR52757|c1_g1_i10	3.01556	659.43	331.223	5.51103	5.51103	0.54834	10.0504	9.15183e-24	1.1824e-19
TR54188|c0_g1_i12	91.1732	0	45.5866	-5.37692	5.37692	0.559759	-9.60577	7.5591e-22	5.85974e-18
TR48920|c0_g1_i3	128.595	0	64.2975	-5.37476	5.37476	0.57289	-9.38184	6.48303e-21	3.86583e-17
TR53500|c0_g1_i11	73.3092	0	36.6546	-5.27006	5.27006	0.555982	-9.47884	2.57118e-21	1.81196e-17
TR52726|c0_g1_i4	0	107.964	53.9822	5.22787	5.22787	0.55772	9.37365	7.00637e-21	3.87948e-17
TR52757|c1_g1_i5	0	135.08	67.5402	5.03988	5.03988	0.576965	8.73516	2.43313e-18	1.17884e-14
TR41484|c0_g1_i5	0	105.369	52.6845	4.98532	4.98532	0.571638	8.72112	2.75474e-18	1.25614e-14
TR44944|c0_g2_i2	62.8586	0	31.4293	-4.81323	4.81323	0.579179	-8.31043	9.53534e-17	3.35986e-13
TR51693|c1_g4_i4	62.2759	0	31.1379	-4.80461	4.80461	0.57954	-8.29038	1.1289e-16	3.80483e-13
TR51808|c0_g1_i8	0.953089	124.129	62.5413	4.74599	4.74599	0.565268	8.39599	4.61977e-17	1.7906e-13
TR51024|c0_g1_i2	52.4946	0	26.2473	-4.74578	4.74578	0.576968	-8.22538	1.9457e-16	6.28453e-13
TR54478|c4_g2_i4	50.5461	0	25.273	-4.71781	4.71781	0.57782	-8.16484	3.21861e-16	9.98012e-13
TR52757|c1_g1_i7	2.03057	300.487	151.259	4.59212	4.59212	0.568856	8.07254	6.88495e-16	2.05275e-12
TR48855|c0_g1_i4	46.8272	0	23.4136	-4.58912	4.58912	0.583247	-7.86824	3.59677e-15	1.03266e-11
TR27276|c0_g1_i3	0.739587	204.632	102.686	4.5545	4.5545	0.589541	7.7255	1.11414e-14	2.97818e-11	yes
TR43526|c1_g2_i9	48.5288	0	24.2644	-4.51114	4.51114	0.589517	-7.65227	1.9746e-14	4.93771e-11
TR48250|c0_g1_i2	61.4379	0	30.7189	-4.48376	4.48376	0.597352	-7.50606	6.09327e-14	1.4245e-10
TR46993|c0_g1_i7	0	63.493	31.7465	4.40047	4.40047	0.587908	7.48496	7.15681e-14	1.58511e-10
TR48445|c0_g1_i3	0	48.6398	24.3199	4.31032	4.31032	0.584218	7.37793	1.60769e-13	3.27964e-10
TR52757|c1_g1_i11	0.203057	175.887	88.0448	4.28031	4.28031	0.609093	7.02736	2.10482e-12	3.07856e-09
TR48289|c0_g1_i4	0	134.536	67.2679	4.26716	4.26716	0.610388	6.9909	2.73132e-12	3.92091e-09
TR50054|c1_g2_i7	1.89573	199.95	100.923	4.2596	4.2596	0.584384	7.28903	3.12188e-13	5.76202e-10
TR50859|c0_g4_i1	1.90618	195.055	98.4807	4.23526	4.23526	0.591542	7.1597	8.08566e-13	1.30582e-09
TR47538|c0_g1_i1	53.5808	0.267972	26.9244	-4.22829	4.22829	0.588637	-7.18319	6.81013e-13	1.14764e-09
TR51258|c0_g1_i5	0.406114	88.7225	44.5643	4.21502	4.21502	0.5835	7.22368	5.0599e-13	8.91451e-10
TR46176|c0_g1_i14	0	44.0567	22.0283	4.20551	4.20551	0.587113	7.16302	7.89183e-13	1.30163e-09
TR45787|c0_g1_i2	41.1058	0	20.5529	-4.18151	4.18151	0.601066	-6.95682	3.48035e-12	4.81774e-09
TR53771|c0_g1_i4	0	49.4463	24.7231	4.17933	4.17933	0.592488	7.05386	1.74023e-12	2.59425e-09
TR53802|c0_g1_i23	40.2491	0	20.1246	-4.16206	4.16206	0.602966	-6.90265	5.10427e-12	6.3819e-09
TR53470|c0_g1_i7	0	109.351	54.6757	4.09564	4.09564	0.613329	6.67772	2.42689e-11	2.54229e-08
TR53090|c0_g3_i10	1.1457	83.1315	42.1386	4.06326	4.06326	0.552989	7.34781	2.01485e-13	4.00485e-10	yes
TR48383|c0_g1_i2	62.457	0.965616	31.7113	-4.05369	4.05369	0.560724	-7.22939	4.85183e-13	8.74672e-10
TR46616|c1_g1_i1	0.203057	79.284	39.7435	4.03049	4.03049	0.60145	6.70129	2.06584e-11	2.35503e-08	yes
TR54817|c1_g1_i8	0	65.5943	32.7971	4.02686	4.02686	0.607232	6.6315	3.32285e-11	3.43445e-08
TR50944|c0_g1_i6	0	59.3314	29.6657	4.0061	4.0061	0.605997	6.61076	3.82364e-11	3.84942e-08
TR53529|c0_g1_i9	0	44.5806	22.2903	4.0017	4.0017	0.599131	6.67916	2.40309e-11	2.54229e-08
TR45557|c1_g1_i7	48.4066	0	24.2033	-3.9935	3.9935	0.61417	-6.50227	7.91184e-11	7.2155e-08
TR51081|c0_g2_i4	0	37.1674	18.5837	3.94768	3.94768	0.596754	6.61525	3.70926e-11	3.78339e-08
TR32539|c0_g1_i1	2.69752	163.365	83.0312	3.92656	3.92656	0.566306	6.93364	4.10156e-12	5.48188e-09
TR53333|c0_g1_i10	55.5338	0.482808	28.0083	-3.88596	3.88596	0.59724	-6.50653	7.69089e-11	7.0975e-08
TR50083|c0_g1_i4	1.90618	86.294	44.1001	3.87812	3.87812	0.580226	6.68382	2.328e-11	2.54229e-08
TR44697|c0_g1_i3	29.5074	0	14.7537	-3.8713	3.8713	0.608412	-6.36296	1.97897e-10	1.64955e-07
TR48937|c0_g1_i8	0	33.6397	16.8198	3.80844	3.80844	0.601576	6.33077	2.43946e-10	1.99058e-07
TR51941|c0_g1_i2	33.0799	0	16.5399	-3.80163	3.80163	0.613868	-6.19291	5.90641e-10	4.36057e-07
TR46430|c0_g1_i15	0	36.1533	18.0766	3.78059	3.78059	0.605046	6.24844	4.14562e-10	3.15063e-07
TR53055|c0_g1_i6	27.6222	0	13.8111	-3.75993	3.75993	0.612119	-6.14248	8.12434e-10	5.77789e-07
TR52740|c2_g1_i4	0	31.8287	15.9143	3.73257	3.73257	0.604137	6.17836	6.47711e-10	4.69251e-07
TR54295|c0_g1_i7	0	42.3536	21.1768	3.68766	3.68766	0.613002	6.01573	1.79079e-09	1.1865e-06
TR54579|c0_g7_i2	28.5654	0	14.2827	-3.67814	3.67814	0.616787	-5.96339	2.47053e-09	1.59594e-06
TR54253|c0_g1_i2	33.4679	0	16.734	-3.6588	3.6588	0.620494	-5.89659	3.71087e-09	2.28304e-06
TR50080|c0_g1_i5	0	39.9761	19.9881	3.6489	3.6489	0.613512	5.94756	2.72166e-09	1.72935e-06
TR50297|c3_g1_i4	35.8192	0	17.9096	-3.64644	3.64644	0.621257	-5.86947	4.37198e-09	2.60701e-06
TR52663|c1_g1_i2	0	35.0434	17.5217	3.63805	3.63805	0.611217	5.95215	2.64647e-09	1.69547e-06
TR45861|c1_g3_i5	34.3738	0	17.1869	-3.62413	3.62413	0.622443	-5.82243	5.79968e-09	3.35512e-06
TR43482|c0_g1_i2	0	34.8594	17.4297	3.61887	3.61887	0.61202	5.913	3.35931e-09	2.10008e-06
TR50596|c0_g1_i2	0	38.0176	19.0088	3.6139	3.6139	0.614005	5.88578	3.96186e-09	2.38077e-06
TR53517|c5_g4_i11	0	34.5984	17.2992	3.61304	3.61304	0.612099	5.90271	3.57585e-09	2.21757e-06
TR27276|c0_g1_i2	0	63.2588	31.6294	3.61143	3.61143	0.62204	5.80579	6.40626e-09	3.65152e-06
TR53529|c0_g1_i2	37.9011	0	18.9505	-3.60904	3.60904	0.624059	-5.78316	7.33089e-09	4.08837e-06
TR52091|c0_g2_i7	46.4699	0	23.2349	-3.60034	3.60034	0.625734	-5.75378	8.72695e-09	4.7308e-06
TR43199|c1_g1_i1	38.3048	0	19.1524	-3.58432	3.58432	0.624133	-5.74288	9.30771e-09	4.97603e-06
TR53066|c0_g2_i4	0.406114	42.9864	21.6963	3.58034	3.58034	0.591085	6.05723	1.38488e-09	9.41707e-07	yes
TR36287|c0_g3_i3	9.78965	218.151	113.971	3.55683	3.55683	0.465417	7.64225	2.13466e-14	5.17114e-11
TR43995|c0_g1_i6	26.5112	0	13.2556	-3.5552	3.5552	0.620702	-5.7277	1.018e-08	5.40507e-06
TR51505|c0_g1_i17	0.739587	67.4951	34.1174	3.53611	3.53611	0.605479	5.84019	5.21423e-09	3.06214e-06
TR37886|c0_g2_i4	0	28.2235	14.1118	3.53158	3.53158	0.61139	5.77632	7.6353e-09	4.19773e-06
TR52478|c0_g1_i5	0	28.183	14.0915	3.53153	3.53153	0.611341	5.77669	7.61834e-09	4.19773e-06
TR48608|c0_g1_i2	736.602	50.3744	393.488	-3.52989	3.52989	0.360691	-9.78649	1.28692e-22	1.24701e-18
TR39178|c0_g2_i17	26.0912	0	13.0456	-3.49557	3.49557	0.621881	-5.62095	1.89906e-08	9.20084e-06
TR52114|c2_g4_i1	22.685	0	11.3425	-3.48122	3.48122	0.620355	-5.61165	2.00408e-08	9.47284e-06
TR50054|c1_g2_i4	0	46.8213	23.4106	3.48019	3.48019	0.622472	5.59091	2.25882e-08	1.04839e-05
TR49713|c0_g1_i28	0	28.1779	14.0889	3.47249	3.47249	0.614155	5.6541	1.56664e-08	7.83514e-06
TR47088|c0_g1_i13	29.3677	0	14.6839	-3.43965	3.43965	0.62603	-5.49438	3.92088e-08	1.69572e-05
TR51258|c0_g1_i8	2.68209	72.9147	37.7984	3.43799	3.43799	0.570305	6.02834	1.65651e-09	1.10699e-06
TR48586|c0_g1_i2	22.2008	0	11.1004	-3.40944	3.40944	0.623344	-5.46959	4.5108e-08	1.92128e-05
TR54670|c3_g6_i1	10.4466	171.191	90.8188	3.36241	3.36241	0.488123	6.88844	5.64086e-12	6.94086e-09
TR50795|c0_g2_i5	34.7637	0	17.3818	-3.36063	3.36063	0.629368	-5.33969	9.31039e-08	3.59071e-05
TR53916|c0_g1_i11	0	25.1828	12.5914	3.35894	3.35894	0.616954	5.44438	5.19849e-08	2.17828e-05
TR54053|c1_g1_i12	0	41.3088	20.6544	3.34317	3.34317	0.625269	5.34678	8.95344e-08	3.47031e-05
TR54112|c0_g1_i15	0	26.8652	13.4326	3.34242	3.34242	0.618915	5.40046	6.64708e-08	2.66982e-05
TR48904|c3_g1_i8	1.18202	54.9648	28.0734	3.33552	3.33552	0.583939	5.7121	1.1159e-08	5.84482e-06
TR51618|c0_g1_i1	1.1457	44.0334	22.5896	3.3254	3.3254	0.572233	5.81126	6.2003e-09	3.56031e-06
TR49135|c0_g1_i8	20.9142	0	10.4571	-3.31086	3.31086	0.626053	-5.28846	1.23349e-07	4.51031e-05
TR52849|c0_g8_i1	0	32.0373	16.0187	3.30754	3.30754	0.623131	5.30793	1.10875e-07	4.15212e-05
TR42929|c1_g2_i2	0	25.3633	12.6817	3.30223	3.30223	0.619534	5.33019	9.81128e-08	3.76515e-05
TR41078|c0_g1_i4	0	43.7776	21.8888	3.30094	3.30094	0.627141	5.26348	1.41354e-07	5.00346e-05
TR50964|c1_g1_i7	0.406114	66.3782	33.3922	3.27214	3.27214	0.623791	5.24557	1.55799e-07	5.46489e-05
TR51902|c0_g3_i11	21.4442	0	10.7221	-3.2439	3.2439	0.628565	-5.1608	2.45901e-07	7.87687e-05
TR44576|c0_g1_i2	0	30.816	15.408	3.23688	3.23688	0.624989	5.1791	2.22956e-07	7.32344e-05
TR54306|c0_g1_i1	0	32.1248	16.0624	3.23138	3.23138	0.625725	5.16421	2.41457e-07	7.83161e-05
TR297|c0_g1_i1	0	25.3176	12.6588	3.21826	3.21826	0.622831	5.16715	2.37689e-07	7.74178e-05
TR36287|c0_g3_i4	33.4398	404.859	219.149	3.20651	3.20651	0.410731	7.80683	5.86446e-15	1.6236e-11	yes
TR54643|c2_g10_i1	1.34876	43.7981	22.5734	3.19107	3.19107	0.571448	5.58419	2.34796e-08	1.07699e-05
TR51579|c0_g1_i5	0	22.9567	11.4784	3.1901	3.1901	0.622316	5.12618	2.95681e-07	9.27972e-05
TR49424|c0_g3_i9	0	24.3374	12.1687	3.1896	3.1896	0.623286	5.11739	3.09786e-07	9.65406e-05
TR45096|c1_g1_i9	32.3684	0	16.1842	-3.18732	3.18732	0.632875	-5.03626	4.74717e-07	0.000137676
TR52829|c2_g1_i3	0	57.9603	28.9802	3.18238	3.18238	0.632118	5.03448	4.7916e-07	0.000138082
TR47856|c0_g1_i14	2.97321	81.0377	42.0055	3.17432	3.17432	0.562269	5.64555	1.64656e-08	8.12461e-06	yes
TR51137|c0_g2_i4	0	24.8834	12.4417	3.17154	3.17154	0.624255	5.08052	3.76412e-07	0.000113097
TR54537|c2_g6_i5	1.4214	63.565	32.4932	3.17149	3.17149	0.597289	5.30981	1.09741e-07	4.12963e-05
TR50861|c0_g1_i6	0	51.5882	25.7941	3.17025	3.17025	0.631648	5.01901	5.19381e-07	0.000146407
TR52188|c0_g1_i5	23.3712	0.267972	11.8196	-3.14173	3.14173	0.621385	-5.05601	4.28127e-07	0.000126672
TR52055|c1_g2_i10	0	22.7435	11.3717	3.14082	3.14082	0.624025	5.03317	4.82442e-07	0.000138401
TR45117|c0_g2_i14	101.111	8.07359	54.5924	-3.14073	3.14073	0.428492	-7.32971	2.30648e-13	4.46989e-10
TR60845|c0_g1_i1	2.64576	161.027	81.8365	3.13513	3.13513	0.624768	5.01806	5.2195e-07	0.000146598
TR54011|c0_g2_i3	0	28.9237	14.4618	3.13369	3.13369	0.627497	4.99395	5.91567e-07	0.000162041
TR43326|c0_g1_i4	28.5649	0	14.2824	-3.13299	3.13299	0.633351	-4.94668	7.54885e-07	0.00019904
TR45169|c0_g1_i6	8.26474	113.181	60.7231	3.12757	3.12757	0.489673	6.38705	1.69113e-10	1.42494e-07
TR49204|c0_g1_i6	0	31.0655	15.5328	3.12708	3.12708	0.628467	4.97574	6.49995e-07	0.000176178
TR53157|c0_g1_i9	29.1014	0	14.5507	-3.11861	3.11861	0.633697	-4.92129	8.59737e-07	0.000219954
TR53794|c0_g1_i10	27.4511	0	13.7255	-3.11404	3.11404	0.633445	-4.91604	8.83145e-07	0.000223727
TR44088|c0_g1_i10	0	37.2264	18.6132	3.1121	3.1121	0.630554	4.9355	7.99456e-07	0.000208663
TR52166|c0_g1_i6	0	21.7118	10.8559	3.10479	3.10479	0.624666	4.97031	6.68444e-07	0.000180547
TR51867|c0_g1_i14	29.8916	0.535944	15.2138	-3.10375	3.10375	0.618796	-5.01578	5.28188e-07	0.000147814
TR40481|c0_g1_i2	0	24.8538	12.4269	3.10188	3.10188	0.626635	4.95006	7.41893e-07	0.000196283
TR50911|c1_g1_i7	0	30.2847	15.1424	3.09647	3.09647	0.629089	4.92214	8.56015e-07	0.000219954
TR53090|c0_g3_i11	1.71855	59.9129	30.8157	3.0947	3.0947	0.594931	5.20179	1.97379e-07	6.65245e-05
TR43065|c0_g1_i1	0.812228	33.7486	17.2804	3.08711	3.08711	0.585913	5.26889	1.3725e-07	4.90299e-05
TR48974|c0_g1_i1	0	24.3896	12.1948	3.08693	3.08693	0.626902	4.9241	8.47482e-07	0.000219719
TR4056|c0_g3_i1	0.369793	28.4905	14.4302	3.07992	3.07992	0.615355	5.00511	5.5831e-07	0.000155124
TR52858|c3_g6_i4	2.85927	77.1698	40.0145	3.06311	3.06311	0.60748	5.04232	4.59925e-07	0.000135049
TR54694|c0_g1_i3	1.31244	35.3014	18.3069	3.05834	3.05834	0.57441	5.32432	1.01333e-07	3.85063e-05
TR48571|c0_g1_i4	0	19.7051	9.85253	3.05738	3.05738	0.624939	4.89228	9.9674e-07	0.000248445
TR41924|c0_g1_i2	0	34.296	17.148	3.05591	3.05591	0.631231	4.84119	1.29066e-06	0.000305965
TR42389|c0_g2_i8	31.2932	1.30941	16.3013	-3.04289	3.04289	0.584424	-5.20665	1.92279e-07	6.51378e-05
TR46802|c1_g1_i4	0	21.5737	10.7868	3.04007	3.04007	0.626838	4.84986	1.23551e-06	0.000296023
TR51262|c1_g1_i3	30.4198	0.535944	15.4779	-3.03828	3.03828	0.621002	-4.89254	9.95411e-07	0.000248445
TR51434|c0_g2_i7	0	20.961	10.4805	3.03437	3.03437	0.626651	4.8422	1.28407e-06	0.000305336
TR25918|c0_g1_i5	20.4674	0	10.2337	-3.02368	3.02368	0.633317	-4.77435	1.80286e-06	0.000406268
TR47856|c0_g1_i4	0.953089	35.1202	18.0366	3.01652	3.01652	0.617462	4.88535	1.03243e-06	0.000254664
TR48074|c0_g1_i1	1.01529	42.5409	21.7781	3.01592	3.01592	0.599871	5.02762	4.96597e-07	0.000141528
TR23567|c0_g1_i1	10.2331	192.723	101.478	3.01441	3.01441	0.569607	5.29209	1.20927e-07	4.44271e-05
TR44912|c0_g1_i10	0	23.831	11.9155	3.01023	3.01023	0.629002	4.78572	1.70375e-06	0.000389596
TR52809|c0_g1_i8	0	22.4483	11.2241	3.00666	3.00666	0.628419	4.78449	1.71424e-06	0.000390843
TR45709|c0_g1_i8	0	20.4425	10.2212	3.00612	3.00612	0.62725	4.79253	1.64687e-06	0.000378893
TR51503|c3_g1_i5	16.9719	0	8.48596	-3.00527	3.00527	0.632102	-4.7544	1.9904e-06	0.000443372
TR46981|c3_g1_i1	0	49.409	24.7045	2.99867	2.99867	0.634497	4.72606	2.28917e-06	0.000498467
TR53615|c0_g1_i4	18.3163	0	9.15813	-2.99196	2.99196	0.632939	-4.72709	2.27763e-06	0.00049735
TR48820|c0_g2_i12	40.5644	1.07189	20.8181	-2.98929	2.98929	0.61553	-4.85645	1.19511e-06	0.000289513
TR33467|c0_g1_i1	0	27.5124	13.7562	2.98793	2.98793	0.631031	4.735	2.1906e-06	0.000481056
TR49183|c0_g2_i2	0	22.4081	11.204	2.98563	2.98563	0.629025	4.74645	2.07023e-06	0.000457213
TR47379|c0_g1_i3	32.5978	0	16.2989	-2.98247	2.98247	0.635903	-4.69014	2.7302e-06	0.000576682
TR50859|c0_g3_i12	84.3741	1471.01	777.691	2.98166	2.98166	0.562368	5.30198	1.14554e-07	4.24886e-05
TR51391|c0_g1_i2	21.1392	0	10.5696	-2.981	2.981	0.634047	-4.70154	2.58205e-06	0.00054688
TR52492|c0_g1_i3	30.9185	0	15.4592	-2.97021	2.97021	0.636028	-4.66995	3.01279e-06	0.00062114
TR48235|c0_g1_i4	17.5129	0	8.75644	-2.96429	2.96429	0.633473	-4.67943	2.87673e-06	0.000602706
TR47496|c1_g1_i1	20.2841	243.554	131.919	2.96356	2.96356	0.494326	5.99515	2.03298e-09	1.33555e-06	yes
TR54866|c8_g5_i8	3.62473	45.7284	24.6766	2.9492	2.9492	0.526041	5.60641	2.06562e-08	9.70453e-06	yes
TR54741|c1_g2_i2	15.5192	0	7.75959	-2.94675	2.94675	0.632987	-4.65532	3.23485e-06	0.000658826
TR51665|c3_g2_i1	2.92146	48.1007	25.5111	2.94314	2.94314	0.567267	5.18829	2.12237e-07	7.03093e-05
TR49519|c0_g1_i1	0	31.0463	15.5231	2.94249	2.94249	0.632994	4.64853	3.34304e-06	0.000676629
TR51842|c2_g1_i1	17.1128	0	8.55639	-2.94112	2.94112	0.633516	-4.64253	3.44175e-06	0.000694137
TR49139|c0_g2_i10	0.203057	22.4982	11.3506	2.92806	2.92806	0.620839	4.7163	2.40173e-06	0.000515734
TR40281|c0_g1_i7	0	18.2874	9.14369	2.92431	2.92431	0.628508	4.65278	3.27484e-06	0.000664561
TR44756|c0_g1_i6	29.2636	0	14.6318	-2.9177	2.9177	0.636243	-4.58583	4.52176e-06	0.000857763
TR51096|c0_g1_i1	17.1601	0	8.58006	-2.91761	2.91761	0.634065	-4.60144	4.19586e-06	0.00080662
TR48213|c0_g1_i4	17.8772	0	8.9386	-2.91615	2.91615	0.634768	-4.59405	4.34735e-06	0.000832104
TR50727|c2_g1_i8	22.9623	0	11.4811	-2.9118	2.9118	0.635579	-4.58133	4.62022e-06	0.000871423
TR48137|c0_g1_i1	0	22.7896	11.3948	2.89785	2.89785	0.631613	4.58802	4.47471e-06	0.000852274
TR51505|c0_g1_i6	0.739587	46.7636	23.7516	2.89038	2.89038	0.625903	4.61794	3.87569e-06	0.000764476
TR45504|c0_g1_i1	19.1478	0	9.57389	-2.88377	2.88377	0.635404	-4.53848	5.66618e-06	0.0010458
TR41957|c0_g1_i1	0.739587	26.0778	13.4087	2.88302	2.88302	0.606117	4.75655	1.96932e-06	0.000439942
TR47538|c0_g1_i5	0	32.7158	16.3579	2.86799	2.86799	0.634661	4.51894	6.2151e-06	0.00111949
TR54037|c2_g2_i4	25.716	230.228	127.972	2.86284	2.86284	0.383157	7.4717	7.91674e-14	1.70472e-10
TR50859|c0_g3_i14	48.0289	604.735	326.382	2.85951	2.85951	0.52462	5.45063	5.01913e-08	2.12611e-05
TR42941|c0_g1_i13	0	17.616	8.808	2.84962	2.84962	0.630353	4.52068	6.16414e-06	0.00111384
TR49610|c0_g1_i1	49.9086	1.29419	25.6014	-2.84807	2.84807	0.623022	-4.57138	4.8453e-06	0.000908124
TR47274|c0_g3_i8	0	20.6058	10.3029	2.83472	2.83472	0.632266	4.48343	7.34539e-06	0.00128534
TR46993|c0_g1_i13	1.4214	41.0451	21.2333	2.83023	2.83023	0.594235	4.7628	1.90922e-06	0.000427748
TR54087|c0_g3_i14	18.7065	0.267972	9.48722	-2.82954	2.82954	0.629464	-4.49515	6.95197e-06	0.0012248
TR54788|c5_g2_i7	14.5507	0	7.27533	-2.82655	2.82655	0.634846	-4.45235	8.49367e-06	0.00145347
TR44013|c0_g1_i5	0	17.6426	8.82128	2.82449	2.82449	0.631081	4.47564	7.61837e-06	0.00132414
TR54037|c2_g2_i3	17.8733	145.851	81.8621	2.82108	2.82108	0.408034	6.91383	4.71749e-12	6.06939e-09
TR45884|c0_g1_i2	0	24.1348	12.0674	2.8192	2.8192	0.633793	4.44814	8.66187e-06	0.0014725
TR50386|c0_g1_i1	0	16.8827	8.44137	2.80486	2.80486	0.631192	4.44375	8.84055e-06	0.00149357
TR51523|c0_g2_i4	2.85927	97.0774	49.9684	2.79953	2.79953	0.626277	4.47011	7.81776e-06	0.00135273
TR52757|c1_g1_i9	4.55194	118.341	61.4467	2.79398	2.79398	0.618326	4.51862	6.22427e-06	0.00111949	yes
TR52474|c0_g1_i2	17.0072	0	8.5036	-2.79108	2.79108	0.636356	-4.38604	1.15435e-05	0.00182621
TR43554|c0_g1_i3	0	20.1088	10.0544	2.78618	2.78618	0.633212	4.40007	1.08217e-05	0.00174768
TR41387|c0_g2_i3	57.7993	2.88679	30.343	-2.78575	2.78575	0.597948	-4.65885	3.1798e-06	0.000652103
TR49032|c0_g2_i11	0	16.3886	8.19429	2.77569	2.77569	0.631689	4.39408	1.11243e-05	0.00178014
TR42642|c0_g1_i2	0	17.3241	8.66203	2.77524	2.77524	0.63223	4.38961	1.13555e-05	0.00180013
TR46176|c0_g1_i7	0	21.1716	10.5858	2.77251	2.77251	0.633857	4.37404	1.21971e-05	0.00191786
TR52978|c1_g1_i2	7.45092	285.702	146.576	2.77177	2.77177	0.627918	4.41423	1.01372e-05	0.00166483
TR28461|c0_g1_i1	2.7806	47.1518	24.9662	2.76756	2.76756	0.569602	4.85876	1.18123e-06	0.000287923
TR40393|c0_g1_i9	15.233	0	7.61652	-2.76643	2.76643	0.636154	-4.34867	1.36964e-05	0.00211079
TR40007|c0_g1_i4	0	18.2553	9.12767	2.76322	2.76322	0.632976	4.36544	1.26866e-05	0.00196691
TR36221|c0_g4_i1	72.6159	672.849	372.732	2.75965	2.75965	0.439586	6.27785	3.4328e-10	2.71538e-07
TR51618|c0_g1_i2	10.2859	156.586	83.4357	2.75474	2.75474	0.58468	4.71153	2.45862e-06	0.00052504
TR38167|c0_g1_i1	0.406114	22.5449	11.4755	2.75447	2.75447	0.618541	4.45318	8.46075e-06	0.00145104
TR54711|c0_g1_i5	0	49.4725	24.7362	2.75355	2.75355	0.637174	4.32151	1.54962e-05	0.0023462
TR49400|c0_g1_i4	74.666	625.56	350.113	2.74698	2.74698	0.407562	6.74002	1.58367e-11	1.88869e-08
TR53470|c0_g1_i1	0	27.1682	13.5841	2.74594	2.74594	0.635677	4.31971	1.56238e-05	0.0023563
TR41753|c0_g1_i2	0	18.6201	9.31006	2.733	2.733	0.633783	4.3122	1.61637e-05	0.00242358
TR52320|c2_g1_i5	0	18.3256	9.16279	2.73205	2.73205	0.633689	4.31134	1.62271e-05	0.00242839
TR54043|c0_g4_i13	13.0974	0	6.54868	-2.73098	2.73098	0.635933	-4.29444	1.75132e-05	0.00257123
TR50859|c0_g5_i1	4.59325	70.4487	37.521	2.72989	2.72989	0.569244	4.79563	1.62162e-06	0.000375243
TR51230|c0_g1_i13	62.9312	0	31.4656	-2.7283	2.7283	0.637716	-4.27823	1.88383e-05	0.00269931
TR53026|c3_g5_i18	19.851	278.772	149.312	2.72723	2.72723	0.567844	4.80279	1.56472e-06	0.00036316
TR40293|c0_g1_i1	2.67164	59.9598	31.3157	2.7195	2.7195	0.608921	4.4661	7.96598e-06	0.00136921
TR44912|c0_g1_i6	25.043	0.803915	12.9235	-2.71774	2.71774	0.622164	-4.36821	1.25272e-05	0.00195785
TR45236|c0_g1_i7	0	17.0153	8.50764	2.71773	2.71773	0.633443	4.29041	1.78347e-05	0.00260362
TR18502|c0_g1_i1	28.2891	280.311	154.3	2.71423	2.71423	0.491502	5.52231	3.34573e-08	1.48205e-05
TR47378|c0_g1_i8	1.10938	33.5911	17.3503	2.71383	2.71383	0.614854	4.41377	1.01584e-05	0.00166483
TR39958|c0_g1_i5	0	16.8756	8.43779	2.71312	2.71312	0.633489	4.28282	1.84539e-05	0.00265898
TR49696|c0_g2_i6	1.01529	28.9873	15.0013	2.71065	2.71065	0.598778	4.52697	5.98351e-06	0.00108373
TR47180|c0_g2_i4	15.0041	0	7.50205	-2.70457	2.70457	0.636765	-4.24736	2.16308e-05	0.00299428
TR51621|c1_g2_i3	0	15.9631	7.98155	2.70188	2.70188	0.633297	4.26638	1.98671e-05	0.00279506
TR49079|c0_g3_i9	12.858	0	6.429	-2.69112	2.69112	0.636378	-4.2288	2.34939e-05	0.00318953
TR54741|c1_g2_i16	0	15.1819	7.59093	2.691	2.691	0.633137	4.25027	2.13511e-05	0.00296506
TR43963|c1_g3_i2	36.7619	304.682	170.722	2.68403	2.68403	0.415539	6.45917	1.05282e-10	9.17008e-08	yes
TR51042|c0_g1_i1	33.8762	267.367	150.621	2.68128	2.68128	0.387912	6.91208	4.77603e-12	6.06939e-09
TR42252|c0_g1_i6	17.6234	0.241404	8.93242	-2.67991	2.67991	0.632576	-4.2365	2.27032e-05	0.00310393
TR37208|c0_g3_i1	120.631	15.2577	67.9442	-2.67594	2.67594	0.398237	-6.71946	1.82397e-11	2.14231e-08	yes
TR45621|c0_g1_i1	163.341	21.4651	92.4029	-2.66736	2.66736	0.371015	-7.18936	6.50964e-13	1.12138e-09
TR50859|c0_g3_i15	21.5597	261.872	141.716	2.6666	2.6666	0.549322	4.85435	1.20782e-06	0.000291679
TR46231|c0_g1_i2	13.3472	0	6.6736	-2.66481	2.66481	0.636792	-4.18475	2.85483e-05	0.00374456
TR52166|c0_g1_i5	0	14.7256	7.36281	2.66099	2.66099	0.633585	4.1999	2.6703e-05	0.00353844
TR51930|c1_g2_i4	9.74834	93.9795	51.8639	2.65609	2.65609	0.474676	5.59558	2.19885e-08	1.02682e-05
TR47001|c1_g1_i11	27.107	0	13.5535	-2.65476	2.65476	0.637712	-4.16295	3.14162e-05	0.00403283	yes
TR52584|c0_g1_i16	13.9519	0	6.97597	-2.65155	2.65155	0.636982	-4.16267	3.14543e-05	0.00403283
TR44255|c0_g2_i2	0.203057	16.2233	8.21318	2.64961	2.64961	0.625575	4.23548	2.28069e-05	0.00310848
TR50641|c0_g1_i3	0	16.0373	8.01867	2.6489	2.6489	0.634484	4.17488	2.9814e-05	0.00387128	yes
TR50399|c0_g2_i6	46.8763	3.87898	25.3776	-2.64456	2.64456	0.557732	-4.74163	2.12008e-06	0.000466893	yes
TR46770|c0_g1_i8	14.6552	0	7.3276	-2.6431	2.6431	0.637183	-4.1481	3.35241e-05	0.00424634
TR44935|c0_g1_i2	0	14.5069	7.25346	2.64309	2.64309	0.633869	4.16978	3.04895e-05	0.00395237
TR44171|c0_g1_i14	0.609171	27.299	13.9541	2.64273	2.64273	0.622762	4.24357	2.19993e-05	0.00302907
TR48905|c0_g3_i19	35.1591	0	17.5795	-2.64187	2.64187	0.637694	-4.14285	3.43019e-05	0.00432365
TR49803|c4_g4_i1	0.369793	26.9838	13.6768	2.63918	2.63918	0.632078	4.17539	2.9747e-05	0.00387117
TR50520|c0_g2_i2	0	14.9515	7.47575	2.63857	2.63857	0.634197	4.16048	3.17573e-05	0.00406236
TR46505|c0_g1_i6	0	17.2781	8.63904	2.63747	2.63747	0.635159	4.15246	3.28915e-05	0.00417986
TR50354|c2_g1_i10	16.1482	0	8.07411	-2.63678	2.63678	0.637514	-4.13604	3.53349e-05	0.00441795
TR45458|c0_g1_i4	1.71855	35.9561	18.8373	2.6341	2.6341	0.598318	4.40251	1.07007e-05	0.00173537
TR43847|c0_g1_i1	4.37476	54.5543	29.4645	2.63152	2.63152	0.580545	4.53285	5.81923e-06	0.00106348
TR38276|c0_g1_i1	642.867	93.0382	367.953	-2.62801	2.62801	0.302163	-8.69733	3.39788e-18	1.46333e-14	yes
TR48608|c0_g1_i1	3432.78	455.979	1944.38	-2.62788	2.62788	0.378819	-6.93704	4.00411e-12	5.44552e-09	yes
TR52650|c1_g3_i19	2.43226	50.7595	26.5959	2.62225	2.62225	0.613779	4.2723	1.93465e-05	0.00274674
TR45103|c0_g2_i2	0	15.1019	7.55093	2.61673	2.61673	0.634715	4.12268	3.74487e-05	0.00462258
TR34532|c0_g1_i1	22.0863	192.474	107.28	2.60728	2.60728	0.484013	5.38678	7.17296e-08	2.85149e-05
TR54246|c1_g9_i7	0.812228	25.6925	13.2524	2.60028	2.60028	0.613079	4.24135	2.22179e-05	0.00304834
TR53461|c0_g1_i8	12.5763	0	6.28814	-2.59772	2.59772	0.637348	-4.07583	4.58501e-05	0.00545131
TR49064|c0_g1_i9	0	16.3299	8.16494	2.59716	2.59716	0.63552	4.08666	4.37622e-05	0.00522712
TR50967|c1_g3_i5	0	19.885	9.94248	2.59144	2.59144	0.63647	4.07158	4.66956e-05	0.00550958
TR53220|c1_g1_i4	17.0082	125.917	71.4628	2.58652	2.58652	0.414082	6.24639	4.20052e-10	3.16136e-07
TR40152|c0_g1_i4	0	17.5686	8.78432	2.56896	2.56896	0.636272	4.03751	5.40204e-05	0.00620775
TR53957|c0_g1_i6	0	13.669	6.83448	2.56143	2.56143	0.635126	4.03295	5.50807e-05	0.00630044
TR50814|c1_g1_i5	12.852	0	6.42598	-2.56055	2.56055	0.637585	-4.01601	5.91906e-05	0.00666652
TR54339|c0_g2_i11	5.50399	61.5661	33.535	2.55831	2.55831	0.504016	5.07586	3.85745e-07	0.000115454
TR49863|c1_g2_i7	1.10938	64.3791	32.7442	2.55826	2.55826	0.635455	4.02588	5.67636e-05	0.00644254
TR49071|c0_g1_i5	0	16.3185	8.15927	2.55613	2.55613	0.63614	4.01819	5.86464e-05	0.00661994
TR52650|c1_g3_i13	18.2679	136.193	77.2302	2.55527	2.55527	0.369615	6.91333	4.73395e-12	6.06939e-09
TR51076|c1_g1_i5	0	18.3499	9.17493	2.5538	2.5538	0.63662	4.0115	6.03354e-05	0.00676866
TR52762|c0_g3_i9	2.21876	59.1024	30.6606	2.5532	2.5532	0.623768	4.09319	4.25481e-05	0.00510571
TR45489|c0_g1_i10	0	20.1603	10.0801	2.548	2.548	0.636965	4.00022	6.32848e-05	0.00704853
TR74563|c0_g1_i1	648.004	4150.81	2399.41	2.54504	2.54504	0.284891	8.93336	4.13251e-19	2.13565e-15	yes
TR50218|c0_g2_i13	0	14.224	7.11201	2.54124	2.54124	0.635704	3.99752	6.40097e-05	0.00711904
TR45011|c0_g1_i1	0	20.3466	10.1733	2.54109	2.54109	0.637056	3.9888	6.6408e-05	0.0072813
TR53386|c0_g1_i4	0.953089	18.3098	9.63143	2.53941	2.53941	0.623446	4.07319	4.6374e-05	0.00550515
TR48677|c0_g1_i1	0	18.3755	9.18777	2.5361	2.5361	0.636827	3.9824	6.82216e-05	0.00742762
TR35084|c0_g1_i1	5.04011	88.771	46.9055	2.53283	2.53283	0.601917	4.20794	2.57712e-05	0.00343849
TR50436|c0_g1_i6	0	14.6245	7.31226	2.53133	2.53133	0.635993	3.98012	6.88795e-05	0.00747825
TR47923|c0_g1_i1	0	14.7859	7.39296	2.52473	2.52473	0.636145	3.9688	7.2236e-05	0.00773434
TR54037|c2_g2_i2	2.77016	47.802	25.2861	2.52318	2.52318	0.593363	4.25233	2.11557e-05	0.00295274
TR53101|c1_g1_i6	0	18.1685	9.08424	2.51376	2.51376	0.637011	3.94617	7.94104e-05	0.00828508
TR54770|c1_g8_i5	19.5275	189.239	104.383	2.50691	2.50691	0.520058	4.82044	1.4324e-06	0.000335464
TR50148|c2_g2_i1	0	13.5413	6.77065	2.50422	2.50422	0.636031	3.93726	8.24177e-05	0.00854672
TR53220|c1_g1_i5	5.46325	67.8895	36.6764	2.50201	2.50201	0.576088	4.3431	1.40484e-05	0.0021522	yes
TR79698|c0_g1_i1	7.81629	79.0689	43.4426	2.50062	2.50062	0.530735	4.71161	2.45768e-06	0.00052504
TR54460|c3_g1_i7	0.739587	20.4331	10.5864	2.49563	2.49563	0.621095	4.0181	5.86682e-05	0.00661994
TR26359|c0_g3_i1	4.86895	54.9383	29.9036	2.49457	2.49457	0.549946	4.53603	5.73229e-06	0.00105299
TR44736|c0_g1_i1	4.2961	73.1659	38.731	2.49297	2.49297	0.6079	4.10094	4.11467e-05	0.00498382
TR51258|c0_g1_i7	2.71841	32.5422	17.6303	2.49031	2.49031	0.591446	4.21054	2.54756e-05	0.00341078
TR40004|c2_g1_i1	1.4214	32.9843	17.2028	2.48822	2.48822	0.611361	4.06996	4.70207e-05	0.0055311
TR52578|c1_g1_i1	12.0094	0	6.00472	-2.47932	2.47932	0.637713	-3.88783	0.000101146	0.00997545
TR52675|c0_g1_i8	12.2229	0	6.11147	-2.47739	2.47739	0.637716	-3.88479	0.00010242	0.0100627
TR54200|c4_g1_i5	0	18.558	9.27902	2.47676	2.47676	0.637348	3.88603	0.000101895	0.0100366
TR47798|c28_g17_i1	375.917	18.0291	196.973	-2.47584	2.47584	0.625202	-3.96006	7.49322e-05	0.00793534
TR54753|c1_g2_i3	2.8428	64.384	33.6134	2.47492	2.47492	0.619604	3.99435	6.48707e-05	0.00719415
TR25909|c0_g1_i1	159.584	7.34739	83.4658	-2.47186	2.47186	0.626367	-3.94635	7.93504e-05	0.00828508
TR54578|c2_g2_i8	14.894	0	7.44701	-2.47062	2.47062	0.637693	-3.87432	0.000106923	0.0103997
TR50301|c1_g1_i2	0	16.1913	8.09564	2.46621	2.46621	0.637135	3.87078	0.000108488	0.0105255
TR46740|c0_g1_i7	0.203057	14.8718	7.53743	2.46255	2.46255	0.631405	3.90012	9.61456e-05	0.00962935
TR52348|c0_g3_i8	0	16.0366	8.01831	2.46176	2.46176	0.63714	3.86376	0.000111655	0.0107922
TR51678|c4_g2_i4	0	17.5798	8.78989	2.46041	2.46041	0.637358	3.86033	0.000113236	0.0108907
TR43679|c0_g1_i9	0	13.8015	6.90075	2.4592	2.4592	0.636714	3.86234	0.000112307	0.0108283
TR50285|c0_g1_i1	13.3412	0	6.67059	-2.45478	2.45478	0.637676	-3.84958	0.000118323	0.0112681
TR44052|c0_g1_i2	0	14.0151	7.00753	2.45342	2.45342	0.63684	3.85249	0.000116921	0.011162
TR50859|c0_g6_i2	10.8896	112.565	61.7273	2.45283	2.45283	0.561646	4.36723	1.25834e-05	0.00196268
TR53375|c0_g3_i1	11.7591	0	5.87953	-2.45187	2.45187	0.637726	-3.84471	0.000120696	0.011466
TR49338|c0_g1_i6	13.2228	0	6.6114	-2.45072	2.45072	0.637711	-3.84299	0.000121543	0.0115041
TR53303|c1_g1_i4	19.1241	0.241404	9.68273	-2.45007	2.45007	0.637247	-3.84477	0.000120665	0.011466
TR54231|c0_g1_i11	58.2105	7.85906	33.0348	-2.4496	2.4496	0.460078	-5.32432	1.01334e-07	3.85063e-05
TR52102|c0_g1_i13	0	19.8386	9.9193	2.44828	2.44828	0.637596	3.83986	0.000123107	0.0116205
TR43933|c0_g2_i1	0	13.9068	6.95339	2.44481	2.44481	0.636903	3.83859	0.000123745	0.0116491
TR54237|c3_g2_i5	42.7187	4.54229	23.6305	-2.4433	2.4433	0.532385	-4.58936	4.44609e-06	0.000848908
TR51263|c1_g1_i13	0	17.8392	8.9196	2.44327	2.44327	0.637484	3.83269	0.000126751	0.0118667
TR33584|c0_g1_i1	125.096	8.2122	66.6539	-2.43988	2.43988	0.611316	-3.99119	6.5743e-05	0.00723697	yes
TR53939|c0_g3_i16	31.6336	0.535944	16.0848	-2.43928	2.43928	0.63723	-3.82794	0.00012922	0.0120397
TR39833|c0_g1_i2	0	14.9609	7.48043	2.43922	2.43922	0.637159	3.82828	0.000129041	0.0120374
TR54154|c0_g2_i12	20.4657	0	10.2328	-2.43859	2.43859	0.637268	-3.82663	0.000129908	0.0120748
TR43579|c0_g1_i4	26.6322	1.01099	13.8216	-2.43801	2.43801	0.629847	-3.8708	0.000108478	0.0105255
TR46901|c0_g1_i1	0	12.7604	6.38018	2.43408	2.43408	0.636723	3.82283	0.000131928	0.012204
TR54866|c8_g1_i2	52.5309	309.059	180.795	2.43073	2.43073	0.290184	8.37651	5.45221e-17	2.01262e-13	yes
TR50241|c0_g3_i1	0	18.3607	9.18036	2.42918	2.42918	0.637589	3.80995	0.000138997	0.0127514
TR34751|c0_g1_i1	0	14.5377	7.26883	2.42746	2.42746	0.63719	3.80963	0.000139175	0.0127526
TR47856|c0_g1_i8	3.60384	41.0392	22.3215	2.42721	2.42721	0.555537	4.36912	1.24747e-05	0.00195359
TR49375|c0_g1_i1	82.499	12.9597	47.7294	-2.42616	2.42616	0.376055	-6.45159	1.10681e-10	9.4284e-08	yes
TR43264|c0_g1_i2	0.406114	17.5726	8.98937	2.4252	2.4252	0.628117	3.86107	0.000112891	0.0108711
TR51346|c0_g1_i13	10.7488	0	5.37438	-2.42513	2.42513	0.637717	-3.80282	0.000143057	0.0130008
TR53181|c0_g1_i1	0.203057	14.4388	7.32095	2.42505	2.42505	0.632161	3.83613	0.000124989	0.01173
TR47707|c0_g1_i3	25.2968	0.241404	12.7691	-2.42392	2.42392	0.63772	-3.80091	0.000144164	0.0130631
TR50855|c0_g4_i5	0.369793	16.7321	8.55094	2.41806	2.41806	0.631767	3.82746	0.000129472	0.0120487
TR41412|c0_g5_i1	3.42167	44.4818	23.9517	2.41802	2.41802	0.603685	4.00544	6.19027e-05	0.00691446	yes
TR50714|c0_g1_i15	0	16.5195	8.25977	2.417	2.417	0.637512	3.79131	0.000149857	0.0134453
TR52829|c2_g1_i8	0	26.2774	13.1387	2.41233	2.41233	0.637691	3.78292	0.000154999	0.0138585
TR46659|c0_g1_i2	21.3318	151.567	86.4496	2.40188	2.40188	0.478301	5.02169	5.12183e-07	0.000144905
TR45489|c0_g1_i5	0.406114	17.1413	8.77368	2.40134	2.40134	0.62848	3.82088	0.000132979	0.0122573
TR49706|c0_g1_i3	0	14.1226	7.06131	2.39616	2.39616	0.637363	3.75949	0.000170257	0.0148796
TR54657|c1_g1_i12	0	17.0016	8.50082	2.39534	2.39534	0.637635	3.75661	0.000172232	0.0150352
TR39051|c0_g1_i1	87.9116	14.5069	51.2092	-2.3943	2.3943	0.336018	-7.12551	1.03699e-12	1.64053e-09
TR54873|c6_g7_i1	49.9633	342.005	195.984	2.39191	2.39191	0.429592	5.56786	2.57888e-08	1.16228e-05
TR50711|c0_g2_i7	35.4749	2.25234	18.8636	-2.39152	2.39152	0.616137	-3.88147	0.000103828	0.0101624
TR39307|c0_g1_i11	0	16.3782	8.18912	2.38835	2.38835	0.637625	3.7457	0.000179889	0.0156157
TR41925|c0_g1_i2	244.954	40.4049	142.679	-2.38734	2.38734	0.353147	-6.76018	1.37823e-11	1.66936e-08	yes
TR44964|c0_g3_i4	11.5137	0	5.75683	-2.38488	2.38488	0.637559	-3.74064	0.00018355	0.0158546
TR48370|c2_g1_i6	0.609171	20.8041	10.7066	2.38395	2.38395	0.627229	3.80077	0.000144249	0.0130631
TR46109|c0_g1_i1	1.68223	47.9683	24.8253	2.37934	2.37934	0.631736	3.76636	0.000165648	0.0145423	yes
TR51902|c0_g3_i9	0	14.9119	7.45595	2.37851	2.37851	0.637557	3.73067	0.000190972	0.0162681
TR47089|c0_g2_i2	16.9785	0	8.48925	-2.37787	2.37787	0.637063	-3.73254	0.000189557	0.0162009
TR53525|c5_g1_i3	404.58	2506.59	1455.59	2.37601	2.37601	0.376757	6.30647	2.85465e-10	2.3051e-07	yes
TR49416|c0_g1_i15	14.5924	0	7.29622	-2.37586	2.37586	0.63732	-3.7279	0.000193081	0.0164117
TR52978|c1_g1_i1	0	12.3252	6.16261	2.37235	2.37235	0.637244	3.72282	0.000197008	0.0166451
TR51130|c1_g1_i5	13.0819	0.252747	6.66734	-2.37205	2.37205	0.636245	-3.7282	0.000192853	0.0164103
TR45512|c0_g1_i4	15.785	0.241404	8.0132	-2.3718	2.3718	0.637478	-3.72059	0.000198758	0.0166928
TR53379|c0_g2_i8	0	11.9944	5.99718	2.37025	2.37025	0.637187	3.71987	0.000199327	0.0167226
TR38803|c0_g1_i1	5.21286	50.8523	28.0326	2.36932	2.36932	0.562636	4.2111	2.54127e-05	0.00340824
TR51267|c0_g2_i12	10.5666	0	5.2833	-2.36769	2.36769	0.637618	-3.71334	0.000204545	0.0170313
TR52617|c0_g1_i2	11.3475	0	5.67374	-2.36485	2.36485	0.637441	-3.70991	0.000207333	0.0171953
TR54643|c1_g1_i4	0	12.563	6.28152	2.36446	2.36446	0.63735	3.70983	0.000207402	0.0171953
TR24172|c0_g2_i1	28.9709	1.26374	15.1173	-2.35777	2.35777	0.630386	-3.74021	0.000183869	0.0158546
TR47249|c0_g1_i6	5.76426	71.4307	38.5975	2.35562	2.35562	0.595318	3.95691	7.59258e-05	0.00801865
TR49807|c2_g1_i10	0	18.2287	9.11433	2.34991	2.34991	0.637724	3.68485	0.00022884	0.0184786
TR49400|c0_g1_i3	79.2544	511.636	295.445	2.34876	2.34876	0.432754	5.42747	5.71579e-08	2.33201e-05
TR52967|c0_g4_i2	13.2894	0	6.64471	-2.34702	2.34702	0.637152	-3.68362	0.000229947	0.0185294
TR18380|c0_g1_i1	0	13.9363	6.96817	2.34594	2.34594	0.637617	3.67923	0.000233935	0.0187575
TR35892|c1_g1_i1	24.4718	2.51255	13.4922	-2.34495	2.34495	0.55911	-4.19408	2.73977e-05	0.0036243
TR48411|c0_g1_i9	1.38508	23.5448	12.465	2.34455	2.34455	0.601605	3.89716	9.73263e-05	0.00970041
TR46160|c0_g1_i2	0	13.6836	6.8418	2.3416	2.3416	0.637614	3.67245	0.00024024	0.0191596
TR42621|c0_g2_i3	10.6392	0	5.31962	-2.33855	2.33855	0.637457	-3.66856	0.00024392	0.0193933
TR50259|c2_g2_i4	10.3999	0	5.19993	-2.33721	2.33721	0.637492	-3.66625	0.00024613	0.019489
TR52767|c0_g1_i1	16.326	0	8.16298	-2.33638	2.33638	0.636615	-3.67001	0.000242541	0.0193233
TR51844|c0_g1_i3	12.6659	0	6.33297	-2.33374	2.33374	0.637118	-3.66296	0.00024932	0.0196399	yes
TR45580|c0_g1_i3	0	12.3155	6.15773	2.33134	2.33134	0.637519	3.6569	0.000255285	0.0199692
TR25541|c0_g1_i1	46.0887	273.21	159.65	2.32821	2.32821	0.379875	6.1289	8.84882e-10	6.23592e-07
TR54815|c0_g2_i5	24.7161	2.81843	13.7673	-2.32714	2.32714	0.549489	-4.2351	2.28452e-05	0.00310848
TR46307|c0_g1_i4	0.953089	15.7178	8.33545	2.32421	2.32421	0.628992	3.69514	0.000219766	0.0179138
TR47749|c0_g1_i2	0	15.5743	7.78716	2.32416	2.32416	0.637725	3.64445	0.00026796	0.0207305
TR46585|c0_g1_i8	0	11.6392	5.81961	2.32295	2.32295	0.637475	3.64398	0.000268454	0.0207367
TR45653|c3_g1_i4	26.4665	0.758242	13.6124	-2.3225	2.3225	0.636208	-3.65055	0.000261684	0.0203058
TR53525|c5_g1_i2	113.512	692.821	403.167	2.32228	2.32228	0.404328	5.74356	9.27043e-09	4.97603e-06	yes
TR43661|c0_g1_i2	0.203057	26.4884	13.3457	2.32151	2.32151	0.637715	3.64035	0.000272267	0.0208969
TR47419|c0_g1_i6	0	12.2507	6.12534	2.31952	2.31952	0.637572	3.63805	0.000274705	0.0210632
TR79580|c0_g1_i1	17.9993	179.282	98.6408	2.31923	2.31923	0.585304	3.96243	7.41892e-05	0.00787818
TR46618|c1_g1_i1	0	14.77	7.38501	2.31573	2.31573	0.637722	3.63125	0.000282051	0.0215081
TR53055|c0_g1_i4	0.953089	17.9987	9.4759	2.31531	2.31531	0.631472	3.66652	0.000245872	0.0194885
TR53567|c0_g4_i1	0	12.6081	6.30406	2.31391	2.31391	0.637632	3.62891	0.000284615	0.021623
TR54638|c4_g4_i1	74.5579	12.6881	43.623	-2.31343	2.31343	0.389588	-5.93815	2.88254e-09	1.81668e-06	yes
TR42472|c0_g1_i3	89.8295	6.458	48.1437	-2.31209	2.31209	0.615666	-3.75544	0.000173039	0.0150717
TR36287|c0_g3_i6	30.1844	195.768	112.976	2.31201	2.31201	0.42577	5.4302	5.62902e-08	2.30876e-05
TR38129|c0_g1_i2	2.03057	44.3859	23.2083	2.30998	2.30998	0.625811	3.69117	0.000223223	0.0181122
TR46506|c0_g1_i5	0	20.3009	10.1504	2.30934	2.30934	0.637555	3.62219	0.000292121	0.0220926
TR54339|c0_g3_i7	4.40064	47.479	25.9398	2.30697	2.30697	0.592902	3.89099	9.9836e-05	0.00988402
TR51191|c5_g5_i6	0	11.6124	5.80618	2.30631	2.30631	0.637563	3.61738	0.000297596	0.0223757
TR54587|c0_g2_i9	0	17.9882	8.99412	2.30609	2.30609	0.637651	3.61653	0.000298577	0.022406
TR44735|c1_g1_i8	10.6079	0	5.30395	-2.30597	2.30597	0.637112	-3.61941	0.000295278	0.0222446
TR49482|c0_g1_i1	6.7388	59.1932	32.966	2.30578	2.30578	0.559925	4.11802	3.82149e-05	0.00468731
TR32643|c0_g1_i2	0	16.0329	8.01643	2.30512	2.30512	0.637711	3.61467	0.00030073	0.0225022
TR54517|c5_g12_i6	10.035	75.3108	42.6729	2.30482	2.30482	0.487846	4.72449	2.30694e-06	0.000500929
TR46520|c5_g2_i4	0	15.1258	7.56292	2.30288	2.30288	0.637724	3.61109	0.000304909	0.0227101
TR53371|c0_g1_i3	0	14.0458	7.0229	2.30284	2.30284	0.637722	3.61104	0.000304974	0.0227101
TR36287|c0_g3_i5	38.8954	237.113	138.004	2.30255	2.30255	0.392496	5.86643	4.45282e-09	2.63494e-06	yes
TR36617|c0_g1_i4	0	11.8272	5.9136	2.30116	2.30116	0.637611	3.60903	0.000307341	0.0228645
TR46824|c0_g1_i3	15.0498	0	7.52492	-2.30019	2.30019	0.636347	-3.61468	0.000300724	0.0225022
TR22216|c0_g2_i1	50.7078	7.72004	29.2139	-2.30011	2.30011	0.456448	-5.03915	4.67606e-07	0.000136411
TR43369|c0_g1_i1	0	11.1678	5.58388	2.30005	2.30005	0.637536	3.60772	0.000308894	0.022936
TR53733|c0_g3_i17	1.84897	37.938	19.8935	2.29671	2.29671	0.627051	3.66272	0.000249556	0.0196399
TR54368|c0_g1_i11	0	11.1943	5.59716	2.29657	2.29657	0.637557	3.60214	0.000315605	0.0232561
TR35462|c0_g1_i2	44.5205	2.90202	23.7113	-2.29621	2.29621	0.622268	-3.69006	0.000224201	0.0181608	yes
TR50105|c0_g2_i4	14.2898	0.505495	7.39767	-2.29577	2.29577	0.633929	-3.62149	0.000292911	0.0221308
TR29198|c0_g1_i1	29.5696	165.245	97.4072	2.29378	2.29378	0.350051	6.55271	5.65025e-11	5.47502e-08	yes
TR36755|c0_g3_i1	9.93653	0	4.96826	-2.29128	2.29128	0.637173	-3.596	0.000323146	0.0235924
TR47441|c0_g1_i2	10.1605	0	5.08024	-2.28667	2.28667	0.637183	-3.58872	0.000332303	0.0239849
TR51174|c1_g1_i7	67.1524	8.31141	37.7319	-2.28494	2.28494	0.53507	-4.27036	1.95156e-05	0.00276064
TR54154|c0_g2_i7	11.6605	0	5.83027	-2.28469	2.28469	0.636935	-3.58701	0.000334486	0.0240916
TR54086|c2_g1_i8	11.5301	0	5.76506	-2.28298	2.28298	0.636935	-3.58432	0.000337963	0.0242579
TR34958|c0_g1_i3	85.0985	15.0467	50.0726	-2.2818	2.2818	0.353623	-6.45263	1.09928e-10	9.4284e-08
TR48876|c0_g2_i19	0	29.7295	14.8647	2.27835	2.27835	0.636736	3.57817	0.000346011	0.0246756
TR50047|c0_g1_i3	0	12.4622	6.23112	2.27795	2.27795	0.637713	3.57206	0.00035418	0.0250737
TR57051|c0_g1_i1	63.4314	0.267972	31.8497	-2.2765	2.2765	0.635336	-3.58314	0.000339488	0.024308
TR46948|c0_g1_i5	0	14.6478	7.32391	2.2764	2.2764	0.637704	3.56969	0.000357405	0.0252099
TR37127|c0_g1_i2	1.01529	21.8929	11.4541	2.27284	2.27284	0.620012	3.6658	0.00024657	0.0194935
TR37626|c0_g1_i5	8.72863	70.5926	39.6606	2.27196	2.27196	0.554634	4.09633	4.19759e-05	0.00506843	yes
TR42511|c0_g1_i2	24.7673	142.214	83.4908	2.27104	2.27104	0.361363	6.28465	3.28597e-10	2.62603e-07
TR54145|c2_g1_i1	16.2428	0.746899	8.49484	-2.27068	2.27068	0.630113	-3.60361	0.000313823	0.023213
TR52294|c0_g1_i5	0	13.4217	6.71084	2.27064	2.27064	0.637724	3.56054	0.000370087	0.0258458	yes
TR54187|c3_g2_i1	165.034	1003.4	584.219	2.26745	2.26745	0.428231	5.29491	1.19073e-07	4.39543e-05
TR13757|c0_g2_i1	78.3751	10.7724	44.5738	-2.26725	2.26725	0.515087	-4.40168	1.07414e-05	0.00173834
TR50967|c1_g3_i1	0	18.9219	9.46097	2.26382	2.26382	0.637392	3.55169	0.00038276	0.0264685
TR53675|c1_g3_i12	10.4725	0	5.23625	-2.26265	2.26265	0.636845	-3.55291	0.000381001	0.0264175
TR53220|c1_g1_i3	75.7465	431.977	253.862	2.26184	2.26184	0.366416	6.17286	6.70635e-10	4.81361e-07
TR36868|c0_g1_i1	3.05188	23.6738	13.3628	2.2614	2.2614	0.572914	3.9472	7.9071e-05	0.00827194
TR50929|c0_g2_i11	40.3707	4.58766	22.4792	-2.26037	2.26037	0.567872	-3.98041	6.87954e-05	0.00747825
TR52875|c1_g1_i10	0	13.0118	6.50591	2.26008	2.26008	0.637722	3.54398	0.000394128	0.0270615
TR42063|c1_g2_i1	15.588	0	7.79398	-2.25993	2.25993	0.635839	-3.55425	0.000379061	0.0263537
TR53101|c1_g1_i1	1.75487	26.4838	14.1193	2.25583	2.25583	0.607016	3.71627	0.000202188	0.0168713
TR51675|c0_g1_i6	1.4214	31.9651	16.6933	2.25428	2.25428	0.627303	3.5936	0.000326143	0.0237615
TR52464|c1_g5_i2	14.0202	0	7.01008	-2.25421	2.25421	0.636125	-3.54366	0.000394617	0.0270711
TR51155|c1_g2_i6	10.7592	0.267972	5.51359	-2.25083	2.25083	0.636867	-3.53422	0.000408979	0.0277858
TR43586|c0_g1_i1	0	10.9452	5.47258	2.24987	2.24987	0.6377	3.52811	0.000418538	0.0282761
TR54067|c3_g1_i1	0	12.0158	6.00788	2.2497	2.2497	0.637726	3.52769	0.000419207	0.0282761
TR28458|c0_g1_i2	0	17.5185	8.75925	2.24846	2.24846	0.637407	3.52752	0.000419479	0.0282761
TR43963|c1_g3_i1	13.9151	123.531	68.7229	2.24791	2.24791	0.558458	4.02521	5.6924e-05	0.00644961	yes
TR47745|c1_g3_i3	17.9085	0.724212	9.31638	-2.24755	2.24755	0.634345	-3.5431	0.000395447	0.0270801
TR52158|c0_g3_i8	14.2166	0	7.10832	-2.24675	2.24675	0.635935	-3.53299	0.00041089	0.0278912
TR46055|c0_g1_i4	0	12.6327	6.31635	2.24362	2.24362	0.637713	3.51823	0.00043444	0.0291327
TR50162|c0_g1_i2	1.01529	25.3302	13.1727	2.24308	2.24308	0.628771	3.5674	0.000360539	0.0253617
TR50077|c0_g2_i1	0	10.9034	5.45168	2.24022	2.24022	0.637714	3.51288	0.000443274	0.0295462
TR50050|c1_g2_i2	0	12.5261	6.26306	2.23945	2.23945	0.63771	3.5117	0.000445246	0.0296521
TR49995|c0_g1_i10	41.113	230.622	135.868	2.23795	2.23795	0.374596	5.97431	2.3107e-09	1.50524e-06
TR48576|c0_g4_i1	35.8507	221.689	128.77	2.23758	2.23758	0.437422	5.11538	3.1311e-07	9.65406e-05
TR47856|c0_g1_i11	12.5982	125.336	68.9669	2.23663	2.23663	0.599069	3.73351	0.000188833	0.0161747	yes
TR50760|c0_g1_i2	21.717	2.27115	11.9941	-2.23535	2.23535	0.577622	-3.86992	0.000108873	0.0105496
TR52375|c0_g1_i7	0	11.8139	5.90693	2.233	2.233	0.637722	3.50152	0.000462609	0.0304165
TR34729|c0_g1_i1	0	14.3916	7.19579	2.23215	2.23215	0.637577	3.50099	0.000463534	0.0304257
TR51775|c0_g1_i10	0	11.5482	5.77409	2.23123	2.23123	0.637724	3.49874	0.000467454	0.0306311
TR54255|c1_g2_i4	1.01529	20.6972	10.8563	2.23065	2.23065	0.619977	3.59796	0.000320726	0.0234682
TR47485|c0_g3_i1	1.99425	26.2051	14.0997	2.23023	2.23023	0.591035	3.77344	0.000161015	0.0142539
TR50964|c1_g1_i15	41.8774	279.74	160.809	2.22762	2.22762	0.493916	4.51012	6.47916e-06	0.00116263
TR40826|c0_g1_i2	39.0549	4.76101	21.908	-2.22671	2.22671	0.552538	-4.02997	5.57829e-05	0.00635916
TR52386|c3_g1_i7	0	11.2134	5.60672	2.22634	2.22634	0.637726	3.49106	0.000481114	0.0311315
TR52046|c0_g1_i10	0.369793	13.9972	7.18351	2.22526	2.22526	0.634767	3.50564	0.000455511	0.030106
TR43959|c0_g1_i1	9.9624	0	4.9812	-2.22474	2.22474	0.636371	-3.49598	0.00047232	0.0307937
TR48042|c0_g1_i10	0	12.9772	6.4886	2.2208	2.2208	0.637638	3.48285	0.000496105	0.031915
TR43256|c0_g1_i1	810.205	130.534	470.369	-2.22026	2.22026	0.464215	-4.78283	1.72843e-06	0.000392921
TR50973|c0_g1_i10	0	13.2753	6.63766	2.21978	2.21978	0.637612	3.4814	0.000498799	0.0320282
TR30963|c1_g1_i1	0	11.2838	5.64189	2.21875	2.21875	0.637719	3.4792	0.000502908	0.0321393
TR48852|c1_g1_i3	0	12.3136	6.15679	2.21692	2.21692	0.63767	3.47659	0.000507825	0.0323734
TR46594|c0_g1_i3	0.406114	18.1413	9.27371	2.2158	2.2158	0.635804	3.48504	0.000492059	0.0317073
TR48616|c1_g1_i12	0	20.3965	10.1983	2.21441	2.21441	0.636842	3.47717	0.00050673	0.0323543
TR53224|c0_g2_i10	0	11.9928	5.99639	2.21386	2.21386	0.63768	3.47174	0.00051709	0.0328022
TR46836|c1_g1_i20	0.609171	21.3834	10.9963	2.21359	2.21359	0.6346	3.48817	0.000486341	0.0314073
TR51970|c0_g5_i2	93.9149	12.6443	53.2796	-2.21193	2.21193	0.542218	-4.07941	4.51505e-05	0.00537637
TR53683|c0_g1_i6	63.3337	1.26374	32.2987	-2.21127	2.21127	0.637402	-3.4692	0.000522013	0.0329259
TR49781|c0_g1_i2	15.0146	1.0301	8.02233	-2.21108	2.21108	0.620144	-3.56544	0.000363249	0.0254755
TR54399|c1_g2_i1	9.14415	114.797	61.9705	2.21079	2.21079	0.612007	3.61237	0.000303414	0.0226593	yes
TR5670|c0_g2_i1	10.0774	0	5.03869	-2.21023	2.21023	0.636293	-3.47361	0.000513505	0.0326015
TR50287|c1_g2_i2	0	20.0237	10.0118	2.20975	2.20975	0.636836	3.46988	0.000520685	0.0329085
TR49093|c0_g1_i1	0	12.5306	6.2653	2.20919	2.20919	0.637631	3.46469	0.00053084	0.0333218
TR53419|c0_g1_i6	29.8288	0.758242	15.2935	-2.2063	2.2063	0.637716	-3.45969	0.000540795	0.0337264
TR41312|c1_g2_i2	1.4214	25.3004	13.3609	2.20526	2.20526	0.618118	3.5677	0.000360126	0.0253557
TR52846|c0_g1_i6	3.40078	37.8949	20.6479	2.20515	2.20515	0.59325	3.71707	0.000201544	0.0168356
TR50816|c2_g1_i5	4.21301	41.3697	22.7913	2.2048	2.2048	0.570755	3.86295	0.000112028	0.0108148
TR54121|c0_g1_i15	19.6501	0.482808	10.0665	-2.20357	2.20357	0.637667	-3.45568	0.000548913	0.0341507
TR51844|c0_g1_i8	1.71855	22.9787	12.3486	2.20166	2.20166	0.60474	3.64067	0.000271926	0.0208914
TR52526|c0_g1_i2	86.0428	15.9174	50.9801	-2.20128	2.20128	0.355706	-6.18848	6.07479e-10	4.44257e-07
TR30685|c0_g1_i1	5.23874	38.4908	21.8648	2.19838	2.19838	0.497283	4.42078	9.83446e-06	0.00161859
TR55911|c0_g1_i1	2.70796	24.6199	13.6639	2.19757	2.19757	0.574772	3.82337	0.000131639	0.0121918
TR44576|c0_g1_i12	2.77016	30.5413	16.6558	2.19713	2.19713	0.57613	3.8136	0.000136959	0.0125942
TR46414|c0_g1_i1	357.122	69.1001	213.111	-2.19688	2.19688	0.339926	-6.46283	1.02761e-10	9.05217e-08
TR46176|c0_g1_i16	0	11.0806	5.5403	2.19682	2.19682	0.637691	3.44496	0.000571146	0.0351665
TR50881|c0_g1_i5	16.4041	1.28672	8.84539	-2.1962	2.1962	0.616481	-3.56248	0.000367375	0.0257259
TR54866|c8_g1_i7	23.5813	145.28	84.4307	2.19444	2.19444	0.501873	4.3725	1.22833e-05	0.00192751
TR48571|c0_g1_i5	10.5044	0	5.2522	-2.19305	2.19305	0.636038	-3.44799	0.000564777	0.0348852
TR51130|c1_g1_i6	0.369793	16.7809	8.57537	2.19062	2.19062	0.636904	3.43949	0.000582817	0.0356867
TR39307|c0_g1_i7	62.478	9.47634	35.9772	-2.18865	2.18865	0.505695	-4.32801	1.50465e-05	0.00229153
TR50906|c0_g1_i23	0	11.0878	5.54388	2.1884	2.1884	0.637668	3.43189	0.000599393	0.0363003
TR41275|c0_g1_i3	23.5088	193.044	108.276	2.1871	2.1871	0.567523	3.85377	0.000116314	0.0111316
TR52910|c0_g1_i12	38.5866	2.81485	20.7007	-2.18692	2.18692	0.622063	-3.5156	0.000438765	0.0293296
TR28095|c0_g2_i1	35.1942	4.90907	20.0516	-2.18563	2.18563	0.538626	-4.05779	4.95386e-05	0.0057806
TR19807|c0_g2_i1	16.5196	1.26762	8.89361	-2.1847	2.1847	0.617579	-3.53752	0.000403897	0.0275371
TR53314|c0_g1_i1	1456.56	290.805	873.683	-2.1841	2.1841	0.30666	-7.12221	1.0621e-12	1.64665e-09	yes
TR54011|c0_g2_i10	22.3829	1.56216	11.9725	-2.18283	2.18283	0.622348	-3.50742	0.000452476	0.029979
TR45655|c0_g2_i1	3.4371	33.1382	18.2876	2.1822	2.1822	0.569081	3.8346	0.00012577	0.0117891
TR36287|c0_g3_i1	0	34.7475	17.3738	2.18071	2.18071	0.635102	3.43363	0.000595553	0.0361242
TR30963|c0_g1_i1	0	10.3334	5.1667	2.17796	2.17796	0.637691	3.41539	0.000636912	0.0377757	yes
TR47007|c0_g1_i1	0	16.4919	8.24594	2.1751	2.1751	0.636916	3.41505	0.000637695	0.0377932
TR32356|c0_g5_i1	1.51549	19.4565	10.486	2.17501	2.17501	0.603852	3.60189	0.000315912	0.0232566
TR49910|c0_g1_i2	0	10.6733	5.33665	2.17403	2.17403	0.637655	3.40941	0.000651046	0.038379
TR48089|c1_g1_i9	0.203057	75.2684	37.7357	2.17304	2.17304	0.634237	3.42622	0.000612049	0.0366657
TR43645|c0_g1_i1	0	11.3272	5.66358	2.17254	2.17254	0.637589	3.40743	0.000655777	0.0385407
TR48576|c0_g3_i1	0.369793	12.601	6.48538	2.17092	2.17092	0.634874	3.41945	0.000627468	0.0373585
TR29319|c0_g1_i1	64.854	10.2024	37.5282	-2.17001	2.17001	0.488446	-4.44268	8.88443e-06	0.00149395	yes
TR53220|c0_g1_i1	1.15615	15.6889	8.42255	2.16934	2.16934	0.627255	3.45847	0.000543262	0.033853
TR36287|c0_g2_i1	5.53589	45.1382	25.3371	2.16864	2.16864	0.555025	3.90727	9.33429e-05	0.00938502	yes
TR49400|c0_g1_i5	16.5917	102.173	59.3825	2.16618	2.16618	0.488115	4.43785	9.08613e-06	0.00152127
TR52847|c0_g3_i4	0	11.0096	5.50482	2.16559	2.16559	0.63759	3.39652	0.000682495	0.0395315
TR52650|c1_g3_i18	0	11.3139	5.65697	2.16408	2.16408	0.637545	3.39439	0.000687806	0.0396711
TR52050|c1_g5_i4	2.31229	35.563	18.9376	2.16282	2.16282	0.631046	3.42736	0.00060949	0.0365758
TR52506|c0_g1_i13	12.6604	0	6.3302	-2.16246	2.16246	0.635003	-3.40543	0.00066061	0.0386926
TR49030|c0_g3_i3	0	16.0091	8.00453	2.15985	2.15985	0.636824	3.3916	0.000694864	0.0399349
TR53341|c7_g1_i2	7.22255	57.6372	32.4299	2.15708	2.15708	0.528681	4.08012	4.50121e-05	0.00536814
TR43402|c0_g1_i4	990.717	191.756	591.237	-2.15515	2.15515	0.365631	-5.89431	3.76247e-09	2.29656e-06
TR53637|c1_g2_i3	28.6032	0	14.3016	-2.15501	2.15501	0.632837	-3.40532	0.000660857	0.0386926
TR45988|c0_g4_i5	12.4613	0	6.23064	-2.15491	2.15491	0.634511	-3.39618	0.000683344	0.0395315
TR51134|c0_g1_i8	29.6642	1.20702	15.4356	-2.15377	2.15377	0.636526	-3.38364	0.000715314	0.0407724
TR51992|c0_g4_i3	5.15565	48.3908	26.7732	2.15329	2.15329	0.57688	3.73265	0.000189479	0.0162009
TR44253|c0_g1_i3	19.9457	1.45977	10.7027	-2.1511	2.1511	0.623202	-3.45168	0.000557098	0.034591
TR45312|c0_g1_i6	0	10.0998	5.04988	2.1508	2.1508	0.637623	3.37316	0.000743109	0.0418353
TR53150|c0_g1_i5	1.4214	27.314	14.3677	2.1507	2.1507	0.626821	3.43113	0.000601082	0.0363458
TR44603|c3_g7_i2	1.95793	22.4405	12.1992	2.1493	2.1493	0.587623	3.65762	0.000254566	0.019933
TR54591|c1_g1_i6	0	13.5089	6.75443	2.14771	2.14771	0.637105	3.37105	0.00074881	0.0420349
TR51462|c0_g3_i6	0.609171	15.3487	7.97895	2.1463	2.1463	0.62932	3.4105	0.000648435	0.0383001
TR42700|c0_g1_i2	0.203057	15.1346	7.66883	2.14451	2.14451	0.637657	3.36311	0.00077071	0.0427929
TR54015|c4_g2_i1	0	9.85447	4.92723	2.14409	2.14409	0.637622	3.36263	0.000772031	0.0427929
TR53853|c0_g1_i1	0	13.2409	6.62044	2.1433	2.1433	0.637108	3.3641	0.000767931	0.0427929
TR54873|c6_g2_i1	3.30669	33.5253	18.416	2.14326	2.14326	0.580672	3.69101	0.000223368	0.0181122
TR42335|c0_g4_i1	0	10.1678	5.08391	2.14304	2.14304	0.637581	3.3612	0.000776054	0.0429093
TR46379|c0_g1_i2	11.8377	0	5.91886	-2.14274	2.14274	0.634845	-3.37521	0.000737592	0.0417049
TR18299|c0_g2_i1	3.99452	35.2325	19.6135	2.13656	2.13656	0.594721	3.59255	0.00032746	0.0237904
TR45788|c0_g1_i3	0	10.3982	5.19909	2.13605	2.13605	0.637512	3.35061	0.000806346	0.044
TR37961|c0_g2_i5	0.203057	18.0467	9.12486	2.13314	2.13314	0.637668	3.34522	0.000822174	0.0446364
TR52278|c0_g2_i5	0	9.84312	4.92156	2.13281	2.13281	0.637572	3.34521	0.000822216	0.0446364
TR52189|c1_g1_i1	0	11.3084	5.65418	2.13189	2.13189	0.637341	3.34498	0.000822881	0.0446388
TR51758|c0_g2_i6	2.63974	44.1263	23.383	2.13158	2.13158	0.626779	3.40085	0.000671762	0.0390948
TR37626|c0_g1_i1	0	18.1938	9.09692	2.12834	2.12834	0.636069	3.34608	0.000819622	0.0446364
TR52562|c0_g1_i6	0	10.8198	5.40989	2.1275	2.1275	0.637387	3.33784	0.000844309	0.0452429
TR50760|c0_g2_i4	232.855	42.592	137.724	-2.12743	2.12743	0.437909	-4.85816	1.18484e-06	0.000287923	yes
TR52593|c0_g2_i4	13.9151	0.252747	7.0839	-2.12724	2.12724	0.637479	-3.33696	0.000846994	0.045344
TR52751|c0_g1_i10	0	13.5798	6.7899	2.12675	2.12675	0.636874	3.33936	0.00083971	0.0451411
TR48419|c0_g1_i4	36.8291	3.66026	20.2447	-2.12411	2.12411	0.607647	-3.49563	0.000472951	0.0308052
TR54584|c0_g2_i9	0	10.2553	5.12764	2.12208	2.12208	0.63745	3.32901	0.000871539	0.0462113
TR49038|c1_g1_i3	0	26.1237	13.0619	2.12192	2.12192	0.634879	3.34225	0.000831024	0.044916	yes
TR49439|c0_g1_i4	0	15.5083	7.75413	2.12186	2.12186	0.636446	3.33393	0.000856296	0.0456528
TR50184|c0_g4_i2	63.8117	10.5485	37.1801	-2.12104	2.12104	0.477317	-4.44367	8.84363e-06	0.00149357
TR53931|c0_g1_i13	1.01529	24.0944	12.5548	2.12101	2.12101	0.632884	3.35134	0.000804209	0.0439334
TR45314|c0_g1_i1	0	12.911	6.45551	2.12016	2.12016	0.636928	3.32873	0.000872419	0.0462263
TR41957|c0_g1_i9	26.3896	0	13.1948	-2.11977	2.11977	0.632102	-3.35352	0.000797904	0.0437122
TR54111|c3_g4_i2	0	13.7969	6.89847	2.11788	2.11788	0.636725	3.3262	0.000880379	0.0465526
TR52869|c1_g1_i8	0.609171	15.3562	7.98269	2.11704	2.11704	0.630827	3.35597	0.000790866	0.0434187
TR10909|c0_g1_i1	10.801	127.28	69.0405	2.1157	2.1157	0.622227	3.40021	0.000673352	0.0391286	yes
TR53981|c0_g1_i8	0	14.8501	7.42505	2.11543	2.11543	0.636492	3.32357	0.000888717	0.0468019
TR41122|c1_g1_i6	1.15615	18.6817	9.91894	2.11387	2.11387	0.633227	3.33826	0.000843061	0.0452429
TR53220|c0_g3_i1	2.36404	26.2893	14.3267	2.11297	2.11297	0.591885	3.56989	0.000357127	0.0252099
TR54810|c2_g4_i6	0	10.3032	5.15162	2.11263	2.11263	0.637369	3.31461	0.000917696	0.0478727
TR48678|c0_g1_i6	45.516	0.494151	23.0051	-2.11061	2.11061	0.634636	-3.3257	0.000881952	0.046561
TR5042|c0_g1_i1	614.652	61.9329	338.293	-2.10975	2.10975	0.608118	-3.4693	0.000521809	0.0329259
TR46207|c2_g6_i5	2.98366	34.5962	18.7899	2.10931	2.10931	0.611937	3.44694	0.000566965	0.0349925
TR54255|c0_g1_i3	0	10.0427	5.02137	2.10813	2.10813	0.637384	3.30747	0.000941431	0.04875
TR48038|c1_g1_i1	28.0074	139.827	83.9174	2.10649	2.10649	0.374938	5.61823	1.92919e-08	9.2314e-06
TR54452|c4_g3_i2	4.56737	33.5768	19.0721	2.10437	2.10437	0.569141	3.69744	0.000217783	0.0177709
TR38546|c0_g1_i2	0.203057	13.9286	7.06582	2.1043	2.1043	0.637679	3.29993	0.000967076	0.049614
TR52044|c2_g1_i1	0.953089	13.9295	7.44128	2.10402	2.10402	0.634014	3.31857	0.000904788	0.0474228
TR46207|c2_g6_i13	0	10.5044	5.25222	2.10154	2.10154	0.637243	3.29786	0.000974239	0.0498167
TR54355|c0_g6_i3	103.118	18.0204	60.5692	-2.10153	2.10153	0.466279	-4.50702	6.57444e-06	0.00117305
TR47457|c0_g1_i3	9.88478	0	4.94239	-2.09645	2.09645	0.634434	-3.30444	0.000951676	0.0491556
TR54439|c0_g1_i2	4.71322	41.5194	23.1163	2.0934	2.0934	0.57817	3.62074	0.000293761	0.0221518
TR47523|c0_g1_i1	14.6392	0	7.31961	-2.0896	2.0896	0.632997	-3.30112	0.000962988	0.0495026
TR10588|c0_g1_i1	63.5584	0	31.7792	-2.08874	2.08874	0.630305	-3.31385	0.000920213	0.0479395
TR53926|c0_g1_i2	2.23363	38.8341	20.5339	2.08724	2.08724	0.62984	3.31392	0.000919992	0.0479395
TR52050|c1_g1_i2	19.6391	94.4532	57.0461	2.0843	2.0843	0.418652	4.97859	6.40495e-07	0.000174212	yes
TR46125|c0_g1_i2	1.3592	17.6102	9.48472	2.08352	2.08352	0.627528	3.3202	0.000899523	0.0472426
TR46993|c0_g1_i31	2.63974	43.3057	22.9727	2.083	2.083	0.628891	3.31218	0.000925705	0.0481636
TR52877|c0_g2_i1	2.16099	21.936	12.0485	2.07252	2.07252	0.580891	3.56782	0.000359966	0.0253557
TR52145|c1_g2_i2	900.556	206.156	553.356	-2.07158	2.07158	0.213855	-9.68687	3.42873e-22	2.95324e-18	yes
TR36221|c0_g3_i1	12.1762	76.5505	44.3633	2.07155	2.07155	0.532499	3.89023	0.000100149	0.00990237	yes
TR50760|c0_g2_i8	135.4	26.6717	81.036	-2.0676	2.0676	0.413638	-4.99858	5.77544e-07	0.000159895
TR42389|c0_g2_i5	46.8613	7.35684	27.1091	-2.0664	2.0664	0.528599	-3.9092	9.26006e-05	0.00932431
TR49400|c0_g1_i1	9.63439	47.9477	28.791	2.06383	2.06383	0.479375	4.30526	1.66793e-05	0.00247694
TR52041|c0_g1_i5	78.391	15.6187	47.0049	-2.05643	2.05643	0.396301	-5.18905	2.11371e-07	7.03093e-05
TR37117|c0_g1_i1	4.35829	38.818	21.5882	2.05638	2.05638	0.572849	3.58974	0.000331005	0.0239145
TR54774|c1_g4_i1	35.5623	183.64	109.601	2.05429	2.05429	0.432188	4.75324	2.00182e-06	0.000444639
TR48391|c0_g1_i8	89.595	14.7868	52.1909	-2.05371	2.05371	0.519834	-3.9507	7.79235e-05	0.00817898
TR47856|c0_g1_i9	5.5931	41.0603	23.3267	2.05163	2.05163	0.580236	3.53585	0.000406465	0.0276768
TR38958|c0_g1_i2	43.1061	5.31934	24.2127	-2.05138	2.05138	0.585908	-3.5012	0.000463171	0.0304257
TR16983|c0_g1_i1	9.21783	58.2839	33.7509	2.05123	2.05123	0.549247	3.73463	0.000187995	0.0161208
TR45253|c0_g1_i5	34.4887	4.90131	19.695	-2.05089	2.05089	0.568841	-3.60538	0.000311701	0.0231001
TR53525|c5_g1_i1	796.905	3684.16	2240.53	2.05012	2.05012	0.327847	6.25328	4.01918e-10	3.11563e-07
TR44941|c0_g1_i2	58.6391	11.7721	35.2056	-2.04862	2.04862	0.402532	-5.08934	3.5932e-07	0.000108382
TR50859|c0_g3_i6	14.8797	154.262	84.571	2.04688	2.04688	0.618397	3.30997	0.000933061	0.0484136
TR51066|c1_g3_i11	25.2082	150.361	87.7846	2.0431	2.0431	0.494983	4.12763	3.66521e-05	0.00454598
TR40666|c0_g1_i2	12.3275	69.684	41.0057	2.03797	2.03797	0.525752	3.87629	0.00010606	0.0103287
TR18210|c0_g1_i1	6.09331	40.2976	23.1955	2.03566	2.03566	0.565005	3.6029	0.000314689	0.0232328
TR51851|c0_g2_i5	48.8947	8.94229	28.9185	-2.03024	2.03024	0.48933	-4.14901	3.33918e-05	0.00423649
TR83106|c0_g1_i1	18.2635	2.55046	10.407	-2.02706	2.02706	0.570151	-3.5553	0.00037755	0.0263091
TR45438|c0_g1_i3	1.55181	17.3137	9.43276	2.02263	2.02263	0.602392	3.35766	0.000786055	0.0432771
TR40958|c0_g1_i2	856.621	5022.99	2939.8	2.02054	2.02054	0.516435	3.91247	9.13576e-05	0.00924537
TR52058|c0_g3_i3	260.954	1226.74	743.845	2.01546	2.01546	0.37631	5.35585	8.5156e-08	3.31719e-05
TR43402|c0_g1_i1	307.665	69.8016	188.734	-2.0129	2.0129	0.30773	-6.54111	6.1062e-11	5.77252e-08
TR45117|c0_g2_i11	350.91	73.604	212.257	-2.0112	2.0112	0.386285	-5.20651	1.92425e-07	6.51378e-05
TR38081|c0_g1_i3	128.515	605.859	367.187	2.01087	2.01087	0.391859	5.13162	2.87264e-07	9.08915e-05
TR40482|c0_g1_i3	16.524	2.05631	9.29017	-1.99821	1.99821	0.598074	-3.34107	0.000834566	0.0449894
TR51770|c0_g1_i1	108.13	21.8858	65.0078	-1.99293	1.99293	0.439246	-4.53716	5.7017e-06	0.00104986
TR47257|c1_g2_i1	609.115	141.316	375.216	-1.98882	1.98882	0.302958	-6.56469	5.21414e-11	5.11639e-08	yes
TR41293|c0_g2_i7	6.39545	49.4299	27.9127	1.98757	1.98757	0.578098	3.43811	0.00058578	0.0357833
TR35271|c0_g1_i2	28.5169	149.145	88.8307	1.98489	1.98489	0.489184	4.05756	4.95891e-05	0.0057806
TR46733|c0_g1_i7	5.91613	35.0396	20.4778	1.98039	1.98039	0.53226	3.72072	0.000198657	0.0166928
TR27792|c0_g3_i1	23.8257	114.575	69.2003	1.97914	1.97914	0.460011	4.30238	1.68976e-05	0.00250062	yes
TR46726|c0_g1_i6	27.1743	135.987	81.5805	1.97874	1.97874	0.445838	4.43824	9.06961e-06	0.00152127
TR49183|c0_g2_i8	2.30185	16.5178	9.40985	1.97639	1.97639	0.58391	3.38475	0.00071242	0.0406373
TR43847|c3_g1_i1	14.4929	71.8676	43.1802	1.97411	1.97411	0.457234	4.3175	1.57808e-05	0.00237537
TR45024|c0_g2_i3	3.05188	19.7397	11.3958	1.9708	1.9708	0.590721	3.33626	0.000849127	0.0454268
TR47450|c0_g2_i1	95.6831	428.275	261.979	1.97077	1.97077	0.388339	5.07487	3.8776e-07	0.000115611
TR51505|c0_g1_i7	188.915	40.9423	114.929	-1.9685	1.9685	0.394727	-4.98698	6.1331e-07	0.000167405
TR35865|c0_g1_i1	27.1572	135.607	81.382	1.9644	1.9644	0.436924	4.49597	6.92535e-06	0.00122288	yes
TR51930|c1_g2_i5	14.9881	74.3772	44.6827	1.96132	1.96132	0.498555	3.93401	8.35415e-05	0.00862324
TR54873|c7_g2_i3	11.4151	60.0431	35.7291	1.95912	1.95912	0.49899	3.92617	8.63103e-05	0.00881514
TR34898|c0_g1_i3	19.0179	2.77664	10.8973	-1.95741	1.95741	0.577618	-3.38876	0.000702104	0.0401968
TR44696|c0_g1_i1	97.8422	22.7915	60.3168	-1.95667	1.95667	0.343959	-5.68867	1.28031e-08	6.57272e-06
TR33498|c1_g1_i1	25.6203	145.812	85.7162	1.95506	1.95506	0.517436	3.77835	0.00015787	0.0140575	yes
TR41645|c0_g1_i6	49.4417	10.6127	30.0272	-1.95496	1.95496	0.429009	-4.55692	5.19093e-06	0.00096267
TR44443|c0_g1_i1	3.60384	28.3774	15.9906	1.95259	1.95259	0.57876	3.37374	0.000741539	0.0418061
TR48803|c0_g2_i2	5.39503	34.9971	20.1961	1.95113	1.95113	0.514326	3.79357	0.000148499	0.013392
TR52305|c0_g3_i1	3.67648	29.5452	16.6108	1.95072	1.95072	0.576916	3.38129	0.000721451	0.0410618
TR50964|c1_g1_i10	21.9817	112.787	67.3843	1.95016	1.95016	0.491585	3.96709	7.27549e-05	0.00775775
TR74538|c0_g1_i1	5.35373	29.4046	17.3792	1.94045	1.94045	0.551654	3.51751	0.00043561	0.0291859
TR50795|c0_g2_i2	107.938	23.026	65.482	-1.94003	1.94003	0.420999	-4.60815	4.06261e-06	0.000789297
TR54187|c3_g2_i2	109.088	25.1423	67.1153	-1.94	1.94	0.358186	-5.41618	6.08857e-08	2.45823e-05
TR54558|c0_g1_i2	15.5346	88.9341	52.2344	1.93726	1.93726	0.520533	3.72169	0.000197895	0.0166746
TR44727|c0_g1_i3	8.88332	62.9957	35.9395	1.93706	1.93706	0.5633	3.43877	0.000584359	0.0357247
TR54761|c2_g1_i2	12.634	62.3797	37.5069	1.93653	1.93653	0.440178	4.39941	1.08546e-05	0.00174935	yes
TR54873|c7_g8_i1	28.9605	126.741	77.8507	1.93367	1.93367	0.383988	5.03575	4.75975e-07	0.000137676
TR51233|c0_g1_i5	25.8041	4.62199	15.213	-1.93355	1.93355	0.529498	-3.65166	0.000260547	0.0202581
TR46457|c0_g2_i5	92.3442	18.2514	55.2978	-1.92989	1.92989	0.48572	-3.97326	7.08953e-05	0.00764358
TR37211|c0_g1_i2	3.30669	26.3483	14.8275	1.92924	1.92924	0.575419	3.35276	0.000800103	0.0438017
TR40803|c1_g1_i4	8.42103	44.2942	26.3576	1.92829	1.92829	0.506564	3.8066	0.000140892	0.0128341
TR46853|c0_g5_i5	34.7159	142.623	88.6694	1.9281	1.9281	0.350673	5.49829	3.83486e-08	1.67008e-05
TR10268|c0_g2_i1	5.26462	34.6721	19.9684	1.92317	1.92317	0.522854	3.67822	0.000234867	0.018806
TR38746|c0_g1_i1	24.0695	108.234	66.1519	1.91914	1.91914	0.433496	4.42712	9.55002e-06	0.00157848
TR44934|c0_g1_i2	28.1851	4.47035	16.3277	-1.91641	1.91641	0.564859	-3.39272	0.000692011	0.0398248
TR44727|c0_g1_i1	7.44706	47.0563	27.2517	1.91578	1.91578	0.535961	3.57447	0.000350938	0.0248896
TR48205|c2_g4_i2	7.04038	41.7606	24.4005	1.91511	1.91511	0.531606	3.6025	0.000315174	0.0232464
TR36219|c0_g1_i1	39.7555	7.61765	23.6866	-1.91205	1.91205	0.51554	-3.70883	0.000208219	0.0172405
TR50743|c0_g1_i1	376.572	93.28	234.926	-1.90699	1.90699	0.293701	-6.49297	8.41622e-11	7.58625e-08	yes
TR43676|c0_g1_i2	5.54634	28.0923	16.8193	1.90472	1.90472	0.502246	3.7924	0.000149201	0.0134331
TR53800|c2_g5_i3	17.7797	73.6671	45.7234	1.90354	1.90354	0.415371	4.58274	4.58912e-06	0.000867669
TR38861|c0_g3_i1	3.88998	26.0292	14.9596	1.89643	1.89643	0.565823	3.35163	0.000803374	0.0439187
TR51401|c0_g1_i2	8.86347	55.0783	31.9709	1.88754	1.88754	0.568136	3.32234	0.000892653	0.0469454
TR47257|c2_g1_i1	841.248	205.327	523.287	-1.88743	1.88743	0.336213	-5.6138	1.97936e-08	9.41335e-06	yes
TR39306|c0_g1_i1	58.0229	244.391	151.207	1.88729	1.88729	0.331064	5.70068	1.1933e-08	6.16689e-06
TR43847|c5_g1_i4	12.1134	60.7954	36.4544	1.88119	1.88119	0.536834	3.50423	0.000457938	0.0302118
TR43085|c0_g1_i1	719.102	3861.91	2290.51	1.87825	1.87825	0.531932	3.53099	0.000414008	0.0280783
TR51268|c0_g2_i2	105.623	23.9827	64.8027	-1.87718	1.87718	0.425682	-4.40981	1.0346e-05	0.0016849	yes
TR40328|c2_g6_i1	7.8845	36.0116	21.9481	1.87652	1.87652	0.456112	4.11417	3.88572e-05	0.00474357	yes
TR52919|c0_g1_i5	24.6798	4.62588	14.6528	-1.87024	1.87024	0.530572	-3.52496	0.000423553	0.0284765
TR54788|c5_g2_i1	60.4632	12.1615	36.3124	-1.86695	1.86695	0.494043	-3.77892	0.000157508	0.0140575
TR36047|c0_g1_i1	47.9849	9.85447	28.9197	-1.86272	1.86272	0.468223	-3.97827	6.94185e-05	0.00752164
TR49047|c0_g1_i1	17.2367	100.538	58.8872	1.86218	1.86218	0.540078	3.44799	0.000564772	0.0348852
TR52650|c1_g3_i7	14.4153	61.2828	37.849	1.85775	1.85775	0.476742	3.89675	9.74905e-05	0.00970041
TR51843|c1_g4_i1	38.6566	173.001	105.829	1.85728	1.85728	0.424457	4.37566	1.21068e-05	0.00190753
TR47176|c0_g1_i4	161.367	661.56	411.464	1.85636	1.85636	0.362865	5.11584	3.12343e-07	9.65406e-05
TR49918|c0_g1_i2	47.1343	192.278	119.706	1.85174	1.85174	0.351263	5.27165	1.35205e-07	4.87487e-05
TR53314|c0_g1_i4	86.5993	19.6843	53.1418	-1.84871	1.84871	0.44859	-4.12116	3.76962e-05	0.00464574	yes
TR47632|c2_g1_i1	260.036	57.7148	158.875	-1.84649	1.84649	0.456571	-4.04425	5.24898e-05	0.00606402
TR36791|c0_g1_i1	92.3465	21.6946	57.0206	-1.84321	1.84321	0.429724	-4.2893	1.79241e-05	0.00261047
TR36021|c0_g1_i2	38.0111	7.49744	22.7543	-1.83952	1.83952	0.529058	-3.47697	0.000507107	0.0323543
TR54568|c1_g1_i9	21.5971	3.81062	12.7038	-1.83948	1.83948	0.545893	-3.36967	0.000752593	0.0422144
TR25536|c0_g1_i2	441.73	112.127	276.929	-1.83888	1.83888	0.329515	-5.58055	2.39759e-08	1.0869e-05
TR54770|c1_g3_i1	12.0293	61.8275	36.9284	1.83784	1.83784	0.493883	3.7212	0.000198281	0.016689
TR48085|c0_g1_i1	88.4339	375.283	231.859	1.83702	1.83702	0.405567	4.52951	5.91195e-06	0.00107328	yes
TR40359|c0_g1_i2	45.7524	209.392	127.572	1.83647	1.83647	0.483472	3.7985	0.000145576	0.0131679	yes
TR36476|c0_g1_i1	92.6447	22.0124	57.3286	-1.83441	1.83441	0.420994	-4.35734	1.31654e-05	0.00203707	yes
TR48741|c0_g3_i1	7.83275	37.2653	22.549	1.83142	1.83142	0.545443	3.35768	0.000786002	0.0432771	yes
TR50924|c0_g1_i4	340.473	90.1992	215.336	-1.83008	1.83008	0.272549	-6.71468	1.88475e-11	2.18066e-08
TR54046|c0_g1_i3	43.0726	9.89238	26.4825	-1.82936	1.82936	0.426101	-4.29324	1.76081e-05	0.00258026
TR44931|c1_g1_i1	4.61414	21.773	13.1936	1.82678	1.82678	0.553002	3.30339	0.000955221	0.0492339
TR47464|c0_g1_i7	42.995	9.71575	26.3554	-1.82478	1.82478	0.462949	-3.94163	8.09285e-05	0.0084208
TR69692|c1_g1_i1	504.525	127.263	315.894	-1.82298	1.82298	0.357172	-5.10392	3.3269e-07	0.000101136
TR54664|c1_g1_i2	55.8525	13.9369	34.8947	-1.81872	1.81872	0.370218	-4.91255	8.98979e-07	0.000226997
TR54433|c0_g1_i10	351.532	94.4425	222.987	-1.81637	1.81637	0.271768	-6.68355	2.33226e-11	2.54229e-08
TR45169|c0_g1_i1	15.8466	74.2191	45.0329	1.81552	1.81552	0.457071	3.97207	7.12505e-05	0.00764996
TR47905|c0_g1_i6	8.67086	45.2308	26.9508	1.81445	1.81445	0.550084	3.29849	0.000972067	0.0497384
TR24310|c0_g1_i1	15.2116	67.4586	41.3351	1.81	1.81	0.438653	4.12626	3.68714e-05	0.00456587
TR46659|c0_g1_i3	29.7001	126.733	78.2166	1.80636	1.80636	0.443589	4.07216	4.65797e-05	0.00550958
TR54627|c1_g2_i3	199.345	43.0131	121.179	-1.80219	1.80219	0.494622	-3.64357	0.000268884	0.0207367
TR40359|c0_g1_i6	288.18	1136.8	712.489	1.8018	1.8018	0.371405	4.85131	1.22649e-06	0.000295267	yes
TR54862|c4_g12_i3	16.5235	74.944	45.7338	1.80019	1.80019	0.476464	3.77823	0.000157949	0.0140575
TR48838|c2_g1_i2	338.641	92.2569	215.449	-1.79927	1.79927	0.245853	-7.31846	2.50839e-13	4.74263e-10	yes
TR46220|c1_g1_i2	720.373	2795.35	1757.86	1.79898	1.79898	0.346586	5.19057	2.09653e-07	7.00521e-05
TR43065|c0_g1_i3	37.3413	154.805	96.0734	1.79806	1.79806	0.429119	4.19011	2.7882e-05	0.00367583
TR52846|c0_g1_i8	22.8776	99.5978	61.2377	1.79737	1.79737	0.465898	3.85785	0.000114389	0.0109744
TR40949|c1_g1_i2	115.293	30.4769	72.8848	-1.79625	1.79625	0.309525	-5.80324	6.50444e-09	3.68042e-06
TR37516|c1_g1_i1	155.007	32.2855	93.646	-1.79368	1.79368	0.517219	-3.46793	0.000524476	0.0330543	yes
TR34070|c0_g1_i3	5.64485	30.2345	17.9397	1.7936	1.7936	0.513127	3.49543	0.000473291	0.0308052
TR46723|c1_g1_i1	64.1024	13.6171	38.8598	-1.78599	1.78599	0.514726	-3.46978	0.000520888	0.0329085
TR29398|c0_g1_i1	56.7528	14.4991	35.626	-1.78586	1.78586	0.386655	-4.61874	3.86071e-06	0.000763465	yes
TR29545|c0_g1_i1	129.939	34.0104	81.9749	-1.78516	1.78516	0.362956	-4.91839	8.72594e-07	0.000221779	yes
TR54761|c3_g6_i2	8.8057	41.8886	25.3472	1.78463	1.78463	0.493294	3.61778	0.000297138	0.0223629
TR11117|c0_g2_i1	11.4938	49.9458	30.7198	1.78159	1.78159	0.517657	3.44163	0.00057821	0.0354607
TR49863|c1_g2_i11	353.967	97.9426	225.955	-1.77962	1.77962	0.266031	-6.68952	2.23905e-11	2.5155e-08
TR51868|c0_g1_i2	76.2257	18.3962	47.311	-1.77714	1.77714	0.433	-4.10424	4.0564e-05	0.00492865
TR42316|c0_g1_i2	20.8306	4.30865	12.5696	-1.77481	1.77481	0.53144	-3.33962	0.000838936	0.0451364
TR43956|c1_g1_i1	1257.98	4923.1	3090.54	1.77014	1.77014	0.384406	4.60487	4.12729e-06	0.000797864
TR47816|c0_g1_i2	40.4131	160.204	100.309	1.7627	1.7627	0.399535	4.41187	1.02484e-05	0.00167252	yes
TR47968|c0_g1_i2	187.243	711.417	449.33	1.7626	1.7626	0.35653	4.94375	7.66321e-07	0.000201371	yes
TR51088|c1_g1_i4	89.5114	22.98	56.2457	-1.76255	1.76255	0.397817	-4.43056	9.3988e-06	0.00156685
TR52712|c7_g1_i3	59.7192	12.3324	36.0258	-1.76253	1.76253	0.522135	-3.37563	0.00073648	0.0416724
TR65884|c0_g1_i1	13.7065	54.2128	33.9597	1.75867	1.75867	0.401435	4.38095	1.18164e-05	0.00186557
TR52797|c1_g1_i3	140.179	35.1259	87.6525	-1.75602	1.75602	0.420013	-4.18087	2.90392e-05	0.00378972	yes
TR54470|c2_g2_i1	291.856	76.3596	184.108	-1.74988	1.74988	0.379654	-4.60915	4.04309e-06	0.000787608
TR49373|c0_g2_i1	23.0229	87.3933	55.2081	1.74584	1.74584	0.377272	4.62754	3.70038e-06	0.000735511
TR44515|c0_g2_i2	12.8162	59.9187	36.3674	1.74578	1.74578	0.478173	3.65093	0.000261292	0.0202957
TR53399|c2_g2_i3	31.4082	7.17634	19.2923	-1.74508	1.74508	0.491432	-3.55101	0.000383761	0.0264904
TR54883|c4_g6_i8	13.597	55.3603	34.4786	1.73527	1.73527	0.476483	3.64183	0.000270703	0.020818
TR49688|c0_g1_i2	733.205	202.369	467.787	-1.73455	1.73455	0.310301	-5.58989	2.27209e-08	1.04839e-05
TR19657|c0_g1_i1	32.7993	134.922	83.8608	1.73229	1.73229	0.462553	3.74506	0.000180349	0.0156381
TR51148|c1_g1_i7	226.163	61.6352	143.899	-1.73059	1.73059	0.339237	-5.10141	3.37127e-07	0.000102085
TR45858|c1_g3_i4	76.2636	19.392	47.8278	-1.73019	1.73019	0.411516	-4.20443	2.61738e-05	0.00348022
TR48298|c0_g1_i2	73.406	16.7644	45.0852	-1.72966	1.72966	0.493061	-3.50801	0.000451472	0.0299381
TR44342|c0_g1_i2	9.34721	48.5481	28.9477	1.72679	1.72679	0.51816	3.33254	0.000860577	0.045818
TR43469|c0_g1_i1	98.5667	360.003	229.285	1.72394	1.72394	0.358028	4.81509	1.4713e-06	0.000343536
TR46159|c0_g1_i1	6.8329	29.1564	17.9947	1.72304	1.72304	0.521488	3.30409	0.00095285	0.0491556
TR53315|c0_g2_i11	26.5431	102.362	64.4524	1.72262	1.72262	0.40631	4.23966	2.23856e-05	0.00306592
TR47102|c0_g1_i7	7.98302	36.407	22.195	1.72104	1.72104	0.480327	3.58305	0.000339602	0.024308
TR46734|c2_g2_i1	88.9946	323.394	206.194	1.7171	1.7171	0.329761	5.20709	1.91822e-07	6.51378e-05	yes
TR38198|c0_g1_i2	44.4945	164.483	104.489	1.71365	1.71365	0.370058	4.63075	3.64346e-06	0.00072606
TR29995|c0_g1_i2	25.5185	105.47	65.4944	1.71284	1.71284	0.449743	3.80849	0.000139819	0.0127965
TR54855|c5_g3_i3	24.9022	97.8943	61.3982	1.71232	1.71232	0.395525	4.32923	1.49635e-05	0.00228337
TR36858|c0_g1_i1	32.4339	7.82831	20.1311	-1.70966	1.70966	0.471154	-3.62867	0.000284889	0.021623
TR38956|c0_g1_i4	102.44	24.4543	63.4473	-1.70902	1.70902	0.484588	-3.52674	0.000420706	0.0283343
TR41858|c0_g1_i3	1009.68	3627.61	2318.65	1.70858	1.70858	0.337575	5.06133	4.16344e-07	0.000123657	yes
TR47257|c0_g1_i1	121.094	28.4377	74.766	-1.70802	1.70802	0.501215	-3.40776	0.000654983	0.0385407	yes
TR25536|c0_g1_i1	46.9632	11.0249	28.994	-1.70674	1.70674	0.506295	-3.37104	0.000748852	0.0420349
TR22245|c0_g1_i4	317.291	83.194	200.243	-1.7055	1.7055	0.405984	-4.2009	2.65859e-05	0.00352896
TR50509|c0_g1_i1	354.515	102.547	228.531	-1.70471	1.70471	0.278364	-6.12404	9.12292e-10	6.37117e-07	yes
TR52290|c1_g1_i3	87.7993	23.0159	55.4076	-1.69727	1.69727	0.414093	-4.09875	4.1538e-05	0.00502337
TR52297|c1_g2_i1	128.019	37.4351	82.7272	-1.69696	1.69696	0.277671	-6.11138	9.87702e-10	6.83622e-07
TR42389|c0_g2_i4	124.499	33.3841	78.9418	-1.69628	1.69628	0.378964	-4.47608	7.60255e-06	0.00132414
TR33276|c0_g1_i1	10.3377	37.4562	23.8969	1.69534	1.69534	0.474408	3.57358	0.000352136	0.0249518
TR43847|c5_g1_i2	13.8474	55.9463	34.8968	1.69278	1.69278	0.483973	3.49767	0.000469344	0.0307149
TR48574|c4_g2_i6	113.97	31.9503	72.9601	-1.69228	1.69228	0.35311	-4.7925	1.64717e-06	0.000378893
TR42472|c0_g1_i5	182.256	43.8809	113.068	-1.69174	1.69174	0.490426	-3.44952	0.000561577	0.0347429
TR54873|c7_g2_i2	72.5333	281.153	176.843	1.68946	1.68946	0.429556	3.93302	8.38837e-05	0.00863556
TR43206|c0_g1_i1	88.7866	335.954	212.37	1.68938	1.68938	0.412939	4.09113	4.29285e-05	0.00514339
TR50248|c0_g1_i2	28.518	99.0758	63.7969	1.68902	1.68902	0.345199	4.89289	9.9365e-07	0.000248445
TR13757|c0_g1_i1	136.901	32.8055	84.8535	-1.68592	1.68592	0.491541	-3.42986	0.000603895	0.0364306
TR54137|c0_g2_i2	24.9197	104.657	64.7884	1.68359	1.68359	0.487195	3.45567	0.000548921	0.0341507
TR52752|c1_g7_i2	64.5542	226.882	145.718	1.68211	1.68211	0.303275	5.5465	2.91448e-08	1.29843e-05
TR40402|c0_g1_i1	41.9028	177.48	109.691	1.6801	1.6801	0.487832	3.444	0.000573166	0.0352177
TR50862|c1_g1_i1	97.0117	26.9268	61.9692	-1.68009	1.68009	0.367539	-4.57118	4.84995e-06	0.000908124
TR53558|c0_g2_i2	27.8924	101.153	64.5225	1.67982	1.67982	0.343761	4.8866	1.02591e-06	0.000254545
TR52344|c0_g7_i1	27.2419	104.376	65.8089	1.67485	1.67485	0.4496	3.72521	0.000195153	0.0165515
TR43314|c1_g1_i4	312.689	92.8158	202.752	-1.6669	1.6669	0.289072	-5.76638	8.09932e-09	4.42149e-06
TR34610|c0_g1_i1	20.0701	79.9249	49.9975	1.66676	1.66676	0.428626	3.88861	0.000100822	0.00995619
TR51756|c3_g2_i5	141.484	529.335	335.41	1.6666	1.6666	0.431028	3.86657	0.000110379	0.0106822
TR47220|c0_g1_i11	346.615	100.468	223.541	-1.65715	1.65715	0.328869	-5.03895	4.68083e-07	0.000136411	yes
TR52755|c1_g1_i7	60.1199	15.0805	37.6002	-1.65053	1.65053	0.485147	-3.40212	0.000668659	0.0389728
TR51843|c1_g13_i1	23.571	95.8147	59.6929	1.64997	1.64997	0.48654	3.39123	0.000695804	0.0399349
TR54770|c1_g3_i2	36.09	131.477	83.7834	1.64976	1.64976	0.429667	3.83962	0.000123223	0.0116205
TR49246|c1_g1_i4	30.8034	7.68213	19.2428	-1.64925	1.64925	0.494459	-3.33547	0.000851548	0.0454622
TR52318|c3_g1_i2	58.1455	15.5104	36.828	-1.645	1.645	0.450426	-3.6521	0.000260105	0.0202581
TR54862|c4_g12_i1	66.6121	237.227	151.919	1.64439	1.64439	0.403866	4.07163	4.66846e-05	0.00550958
TR22032|c0_g1_i1	33.0893	123.677	78.3831	1.644	1.644	0.445762	3.68807	0.000225965	0.0182845
TR51147|c0_g1_i1	190.777	55.8926	123.335	-1.64041	1.64041	0.313223	-5.2372	1.63034e-07	5.66738e-05
TR54046|c0_g1_i2	71.5086	19.6192	45.5639	-1.64019	1.64019	0.388507	-4.22177	2.42388e-05	0.00327918
TR54237|c3_g7_i4	21.8409	74.2669	48.0539	1.63979	1.63979	0.356395	4.60104	4.2038e-06	0.00080662
TR53813|c0_g1_i1	68.8066	16.7048	42.7557	-1.63955	1.63955	0.493413	-3.32288	0.000890945	0.0468874
TR36843|c0_g1_i9	100.723	339.738	220.231	1.63544	1.63544	0.358255	4.56502	4.99451e-06	0.000930696
TR50924|c0_g1_i2	1309.59	390.598	850.093	-1.63412	1.63412	0.313084	-5.21943	1.79476e-07	6.18346e-05
TR48553|c0_g1_i1	29.5477	112.354	70.9506	1.62731	1.62731	0.406169	4.00648	6.16304e-05	0.00689397
TR40605|c0_g1_i1	34.4909	9.15682	21.8239	-1.62677	1.62677	0.471495	-3.45024	0.000560093	0.0347065
TR54774|c1_g2_i2	27.5226	107.814	67.6685	1.62633	1.62633	0.474053	3.43068	0.000602067	0.0363769
TR28240|c0_g1_i1	308.414	83.8142	196.114	-1.6254	1.6254	0.438085	-3.71023	0.000207072	0.0171953
TR35803|c0_g1_i1	23.9397	85.539	54.7393	1.62441	1.62441	0.42499	3.82224	0.000132247	0.0122189	yes
TR38038|c0_g1_i7	53.8279	14.5773	34.2026	-1.6198	1.6198	0.42897	-3.77602	0.000159356	0.0141502
TR54237|c3_g7_i1	29.5103	114.357	71.9336	1.61664	1.61664	0.460451	3.511	0.000446418	0.0297046
TR46593|c0_g1_i9	195.421	54.58	125.001	-1.61661	1.61661	0.410607	-3.93711	8.24694e-05	0.00854672
TR51042|c0_g1_i3	101.216	331.757	216.486	1.61388	1.61388	0.306271	5.26944	1.36837e-07	4.90299e-05
TR47839|c0_g1_i2	39.0373	10.0443	24.5408	-1.61175	1.61175	0.474607	-3.39596	0.000683878	0.0395329
TR32548|c0_g1_i1	361.429	113.479	237.454	-1.6089	1.6089	0.245819	-6.54505	5.94745e-11	5.69185e-08	yes
TR47651|c0_g1_i4	31.9161	123.951	77.9335	1.60888	1.60888	0.482335	3.3356	0.00085116	0.0454622
TR54717|c3_g2_i9	36.8737	140.263	88.5685	1.60577	1.60577	0.453466	3.5411	0.000398455	0.027214
TR46460|c0_g1_i17	351.107	101.664	226.385	-1.60459	1.60459	0.387503	-4.14084	3.46039e-05	0.00435464
TR48853|c0_g1_i4	68.8342	17.8162	43.3252	-1.60379	1.60379	0.477733	-3.35709	0.000787667	0.0433351
TR47958|c0_g1_i3	8.45736	32.1959	20.3266	1.60344	1.60344	0.478561	3.35053	0.000806563	0.044
TR45939|c0_g1_i2	48.8588	13.8358	31.3473	-1.60326	1.60326	0.409639	-3.91383	9.08422e-05	0.00920522
TR52200|c0_g1_i4	208.925	670.599	439.762	1.59985	1.59985	0.296558	5.39474	6.86238e-08	2.74209e-05
TR51756|c3_g2_i4	535.515	1746.32	1140.92	1.59354	1.59354	0.318971	4.99588	5.85669e-07	0.000160995	yes
TR42108|c0_g1_i3	233.687	74.3339	154.01	-1.59354	1.59354	0.253946	-6.27511	3.49392e-10	2.73581e-07
TR52050|c1_g5_i2	73.0765	244.514	158.795	1.59252	1.59252	0.345432	4.61023	4.02218e-06	0.000787362	yes
TR50964|c1_g1_i3	60.2813	233.843	147.062	1.59162	1.59162	0.480108	3.31513	0.000916011	0.047817
TR41828|c0_g1_i1	16.6693	60.7628	38.716	1.59148	1.59148	0.385913	4.12393	3.7247e-05	0.00460502
TR51216|c1_g1_i2	74.8667	277.815	176.341	1.59055	1.59055	0.446751	3.56027	0.000370479	0.0258498
TR34958|c0_g1_i2	217.108	59.481	138.294	-1.5902	1.5902	0.456536	-3.48318	0.000495491	0.031902
TR46430|c0_g1_i8	18.0494	62.8955	40.4725	1.5895	1.5895	0.40774	3.89833	9.6858e-05	0.00967747
TR50617|c2_g3_i5	116.407	386.798	251.603	1.58869	1.58869	0.368927	4.30623	1.66059e-05	0.0024733
TR53096|c0_g1_i1	151.293	47.4202	99.3564	-1.58683	1.58683	0.307465	-5.16101	2.45624e-07	7.87687e-05	yes
TR20771|c0_g1_i1	30.1837	101.849	66.0163	1.58629	1.58629	0.431294	3.67799	0.000235078	0.018806
TR40159|c35_g2_i1	256.457	928.982	592.72	1.58343	1.58343	0.458757	3.45157	0.000557336	0.034591
TR50636|c1_g1_i5	19.8984	67.3284	43.6134	1.58338	1.58338	0.372563	4.24995	2.13814e-05	0.00296506
TR26558|c0_g2_i2	9.10285	33.9479	21.5254	1.58024	1.58024	0.452846	3.48959	0.000483767	0.031277
TR45053|c0_g1_i1	72.0309	20.9286	46.4797	-1.57725	1.57725	0.406585	-3.87926	0.000104776	0.0102294
TR42389|c0_g2_i1	191.558	59.0932	125.326	-1.57678	1.57678	0.345574	-4.5628	5.04762e-06	0.000938337
TR44834|c0_g1_i2	76.9131	22.8974	49.9053	-1.57613	1.57613	0.395538	-3.98478	6.7542e-05	0.00737435
TR47157|c0_g1_i2	64.3038	19.4539	41.8788	-1.57599	1.57599	0.376222	-4.189	2.80184e-05	0.00368754
TR49685|c1_g1_i1	56.2844	15.2642	35.7743	-1.57388	1.57388	0.472929	-3.32794	0.000874894	0.0463257
TR46804|c0_g1_i2	98.045	331.253	214.649	1.57312	1.57312	0.409219	3.84419	0.000120951	0.0114761
TR13305|c0_g1_i1	11.4669	44.033	27.7499	1.57296	1.57296	0.458953	3.42728	0.00060966	0.0365758
TR32362|c0_g1_i1	43.5166	131.915	87.7158	1.57138	1.57138	0.316265	4.96855	6.74557e-07	0.000181566
TR45817|c0_g1_i4	68.1283	19.5758	43.852	-1.56817	1.56817	0.431266	-3.63619	0.000276701	0.0211535
TR41127|c0_g3_i1	193.782	58.6729	126.227	-1.56694	1.56694	0.372486	-4.20672	2.591e-05	0.00345106	yes
TR54314|c0_g1_i6	60.6009	17.3212	38.961	-1.5658	1.5658	0.431894	-3.62542	0.000288494	0.0218397
TR53630|c3_g6_i1	91.6178	25.2671	58.4424	-1.56431	1.56431	0.466069	-3.35638	0.000789688	0.0433924
TR48759|c0_g1_i5	65.5396	19.3878	42.4637	-1.56376	1.56376	0.370808	-4.21716	2.474e-05	0.00334115
TR43402|c0_g1_i6	252.684	77.2132	164.948	-1.56341	1.56341	0.363637	-4.29938	1.71274e-05	0.00252895
TR31294|c0_g1_i1	178.525	56.3101	117.418	-1.56316	1.56316	0.298134	-5.24313	1.57874e-07	5.51271e-05
TR52635|c2_g1_i4	118.488	34.2616	76.3749	-1.56214	1.56214	0.418641	-3.73146	0.000190375	0.0162387
TR47148|c5_g2_i13	21.4452	71.8361	46.6407	1.56213	1.56213	0.426536	3.66235	0.000249909	0.0196478
TR51770|c0_g1_i8	117.449	32.4627	74.9561	-1.56128	1.56128	0.469665	-3.32425	0.000886558	0.04672
TR47742|c0_g1_i9	287.062	83.5109	185.286	-1.55948	1.55948	0.422936	-3.68727	0.000226674	0.0183228	yes
TR47151|c0_g1_i1	189.996	55.7771	122.886	-1.55832	1.55832	0.407367	-3.82534	0.000130594	0.0121095
TR54862|c4_g6_i1	117.201	377.654	247.427	1.55798	1.55798	0.351725	4.42952	9.44419e-06	0.00157104
TR41020|c0_g1_i2	145.376	478.667	312.021	1.55355	1.55355	0.395609	3.92699	8.6016e-05	0.00879667	yes
TR19745|c0_g1_i1	56.6354	16.1109	36.3731	-1.55239	1.55239	0.423315	-3.66722	0.000245201	0.0194751
TR50743|c0_g1_i2	68.9379	19.9387	44.4383	-1.55097	1.55097	0.455412	-3.40565	0.000660069	0.0386926	yes
TR44910|c0_g1_i2	34.449	9.70023	22.0746	-1.54977	1.54977	0.451956	-3.42902	0.000605759	0.0364844
TR40394|c0_g2_i5	63.2433	18.0898	40.6665	-1.54645	1.54645	0.417531	-3.70378	0.000212407	0.0174239
TR52941|c0_g2_i1	101.846	31.8063	66.8259	-1.54633	1.54633	0.368928	-4.19141	2.77231e-05	0.0036611
TR40209|c0_g3_i2	15.878	56.785	36.3315	1.54539	1.54539	0.465851	3.31736	0.000908736	0.0475889
TR45520|c0_g1_i3	40.6612	132.806	86.7338	1.5402	1.5402	0.406016	3.79344	0.000148572	0.013392
TR50713|c0_g1_i1	436.14	142.712	289.426	-1.5375	1.5375	0.286739	-5.36203	8.2293e-08	3.23821e-05
TR52752|c1_g7_i1	102.308	308.798	205.553	1.53612	1.53612	0.286393	5.36367	8.15485e-08	3.22529e-05
TR52755|c0_g1_i1	23.0697	74.1382	48.6039	1.53569	1.53569	0.386572	3.97258	7.10983e-05	0.00764996
TR26926|c0_g1_i1	123.339	409.621	266.48	1.53537	1.53537	0.401288	3.8261	0.000130187	0.0120862
TR49268|c1_g1_i4	138.285	45.7825	92.034	-1.53156	1.53156	0.262524	-5.83399	5.41161e-09	3.15415e-06
TR51473|c0_g4_i6	16.7893	62.0761	39.4327	1.53079	1.53079	0.454827	3.36566	0.000763608	0.0426471
TR54249|c2_g2_i5	74.0818	235.25	154.666	1.52903	1.52903	0.360052	4.2467	2.16941e-05	0.00299769	yes
TR50301|c1_g1_i26	104.375	319.12	211.748	1.52528	1.52528	0.345978	4.4086	1.04042e-05	0.00169082
TR51678|c4_g1_i1	69.932	241.932	155.932	1.52498	1.52498	0.462315	3.29857	0.000971785	0.0497384	yes
TR30388|c0_g1_i1	136.77	425.928	281.349	1.52357	1.52357	0.342344	4.45042	8.57038e-06	0.00146336	yes
TR49887|c0_g2_i1	19.0025	64.4234	41.7129	1.52315	1.52315	0.446954	3.40784	0.000654786	0.0385407
TR46659|c0_g1_i5	48.7708	155.384	102.077	1.5229	1.5229	0.383854	3.96741	7.26587e-05	0.00775775	yes
TR54862|c4_g12_i2	60.5089	193.336	126.923	1.52256	1.52256	0.381903	3.98676	6.69813e-05	0.00733379
TR44334|c0_g1_i1	22.3571	79.7852	51.0712	1.52156	1.52156	0.459456	3.31164	0.000927502	0.048222
TR7052|c0_g1_i1	30.0225	101.796	65.9091	1.52102	1.52102	0.44681	3.40416	0.000663669	0.0387694
TR54862|c4_g9_i4	38.3605	121.423	79.8915	1.52081	1.52081	0.369386	4.11712	3.83635e-05	0.00469109
TR51283|c0_g1_i8	13.3791	42.5785	27.9788	1.51997	1.51997	0.460591	3.30004	0.000966694	0.049614
TR53646|c2_g1_i8	37.709	11.0478	24.3784	-1.51864	1.51864	0.453977	-3.34519	0.000822259	0.0446364
TR52941|c0_g2_i2	122.91	36.8114	79.8607	-1.51721	1.51721	0.441539	-3.43619	0.000589965	0.0359257
TR41728|c0_g2_i2	82.002	25.7904	53.8962	-1.51698	1.51698	0.350152	-4.33236	1.47523e-05	0.00225558
TR38207|c0_g1_i1	57.6172	17.8198	37.7185	-1.51576	1.51576	0.386378	-3.92301	8.74494e-05	0.00890801
TR40159|c35_g8_i1	49.8532	157.394	103.624	1.5142	1.5142	0.397667	3.80771	0.000140262	0.0128048
TR24391|c0_g2_i2	129.492	382.693	256.093	1.51402	1.51402	0.229336	6.60175	4.06326e-11	4.03821e-08
TR52124|c1_g1_i4	18.4088	62.4786	40.4437	1.51354	1.51354	0.424523	3.56528	0.000363471	0.0254755
TR51756|c3_g2_i1	123.522	402.533	263.028	1.51276	1.51276	0.408861	3.69994	0.000215648	0.0176338
TR50743|c0_g1_i3	1301.96	440.256	871.106	-1.51211	1.51211	0.238134	-6.34984	2.15536e-10	1.77746e-07	yes
TR45707|c0_g1_i5	327.939	1043.47	685.706	1.5105	1.5105	0.385471	3.91858	8.90722e-05	0.00904953	yes
TR50228|c0_g8_i9	19.6227	62.695	41.1588	1.50925	1.50925	0.387337	3.89647	9.7606e-05	0.00970041
TR41176|c0_g1_i1	34.793	10.0768	22.4349	-1.50812	1.50812	0.445745	-3.38338	0.000716007	0.0407819
TR45707|c0_g1_i3	101.344	320.032	210.688	1.50601	1.50601	0.352237	4.27556	1.90659e-05	0.00272186
TR51401|c0_g2_i1	134.187	445.973	290.08	1.50272	1.50272	0.43615	3.44542	0.000570174	0.0351346
TR54640|c1_g1_i1	404.661	1334.42	869.54	1.50172	1.50172	0.42065	3.56999	0.000356998	0.0252099
TR50384|c0_g1_i5	121.749	38.4962	80.1227	-1.49916	1.49916	0.366227	-4.09353	4.24858e-05	0.00510571	yes
TR51914|c0_g1_i1	13.1656	41.3811	27.2734	1.49916	1.49916	0.445813	3.36276	0.000771683	0.0427929
TR36611|c0_g1_i1	177.111	60.2116	118.661	-1.49709	1.49709	0.286383	-5.22756	1.71761e-07	5.94409e-05
TR34398|c0_g1_i1	14.9777	46.137	30.5573	1.4957	1.4957	0.444831	3.36239	0.00077271	0.0427929
TR49268|c1_g1_i6	108.912	36.0207	72.4662	-1.49511	1.49511	0.328522	-4.55102	5.33865e-06	0.000987701
TR28474|c0_g1_i1	32.6837	9.64739	21.1656	-1.4941	1.4941	0.450109	-3.31942	0.000902061	0.0473129
TR48853|c0_g1_i3	158.131	49.6109	103.871	-1.49387	1.49387	0.411706	-3.6285	0.000285075	0.021623
TR52080|c0_g1_i3	49.3348	147.969	98.6517	1.49303	1.49303	0.361096	4.13471	3.55399e-05	0.00443309
TR46653|c0_g1_i1	240.858	774.35	507.604	1.4924	1.4924	0.404264	3.69164	0.000222811	0.0181049
TR54046|c0_g1_i1	373.799	121.939	247.869	-1.49136	1.49136	0.339245	-4.39612	1.10203e-05	0.00177238
TR53843|c1_g3_i3	49.9821	15.9819	32.982	-1.49115	1.49115	0.404746	-3.68416	0.000229461	0.0185095
TR43256|c0_g1_i2	1789.54	550.961	1170.25	-1.4902	1.4902	0.420355	-3.5451	0.000392467	0.0269713
TR40359|c0_g1_i4	43.7302	136.205	89.9677	1.48979	1.48979	0.359229	4.14718	3.36588e-05	0.00425644	yes
TR36830|c0_g2_i3	105.984	326.197	216.09	1.48724	1.48724	0.304911	4.8776	1.07383e-06	0.000263425
TR53385|c1_g3_i1	1608.17	538.849	1073.51	-1.48689	1.48689	0.29944	-4.96559	6.8492e-07	0.000183717
TR54638|c4_g4_i2	586.556	185.93	386.243	-1.48325	1.48325	0.396874	-3.73734	0.000185975	0.0159652	yes
TR15208|c0_g1_i1	39.3026	114.137	76.72	1.48195	1.48195	0.29654	4.99747	5.80864e-07	0.000160242
TR48391|c0_g1_i2	351.969	120.783	236.376	-1.47907	1.47907	0.270021	-5.47759	4.3115e-08	1.84654e-05
TR46715|c0_g1_i1	37.1301	120.504	78.8168	1.47827	1.47827	0.401353	3.68321	0.000230315	0.0185397
TR51905|c0_g2_i1	875.902	2594.84	1735.37	1.47735	1.47735	0.303387	4.86953	1.11862e-06	0.000273548
TR53558|c0_g2_i4	53.8109	155.641	104.726	1.47409	1.47409	0.25857	5.70092	1.19163e-08	6.16689e-06
TR53399|c2_g1_i2	120.398	40.0568	80.2273	-1.47409	1.47409	0.347502	-4.24195	2.21586e-05	0.00304559
TR52044|c3_g5_i1	49.0465	14.6871	31.8668	-1.47324	1.47324	0.446912	-3.29649	0.000979	0.0499944
TR53335|c0_g1_i2	39.329	12.2396	25.7843	-1.47263	1.47263	0.424701	-3.46746	0.000525404	0.0330859
TR47686|c0_g1_i2	802.617	280.401	541.509	-1.47247	1.47247	0.220449	-6.67941	2.39908e-11	2.54229e-08
TR50184|c0_g4_i3	38.1008	118.903	78.5017	1.47177	1.47177	0.371473	3.96198	7.43316e-05	0.00788251
TR44931|c1_g1_i2	48.0664	146.675	97.3705	1.47077	1.47077	0.395186	3.72171	0.000197882	0.0166746
TR34309|c0_g1_i1	25.5856	75.7866	50.6861	1.46989	1.46989	0.344011	4.27279	1.93045e-05	0.00274581
TR54873|c6_g7_i3	187.573	564.587	376.08	1.46951	1.46951	0.339809	4.32453	1.52858e-05	0.00231887
TR36997|c0_g1_i3	556.377	192.038	374.207	-1.46543	1.46543	0.269682	-5.43393	5.51273e-08	2.27309e-05
TR46458|c1_g3_i1	561.005	1777.42	1169.21	1.46541	1.46541	0.415324	3.52835	0.00041816	0.0282761
TR47450|c0_g2_i2	691.852	1981.92	1336.89	1.46485	1.46485	0.253157	5.78634	7.19383e-09	4.041e-06
TR32779|c0_g2_i1	111.986	37.5379	74.762	-1.46292	1.46292	0.319666	-4.57639	4.73071e-06	0.000890097
TR51248|c0_g1_i7	47.995	147.521	97.758	1.46118	1.46118	0.339628	4.3023	1.69033e-05	0.00250062
TR53665|c0_g1_i3	123.037	346.556	234.796	1.46039	1.46039	0.233598	6.2517	4.06012e-10	3.1162e-07
TR51843|c1_g3_i1	30.044	92.7237	61.3839	1.4603	1.4603	0.412116	3.54342	0.000394967	0.0270712
TR49187|c1_g1_i3	75.4779	24.2551	49.8665	-1.4591	1.4591	0.391948	-3.72268	0.000197116	0.0166451
TR38010|c0_g2_i1	650.538	1932.58	1291.56	1.4583	1.4583	0.326369	4.46825	7.88615e-06	0.00136153
TR51531|c0_g4_i3	65.7213	21.9363	43.8288	-1.45805	1.45805	0.365211	-3.99235	6.54203e-05	0.0072241
TR52957|c0_g1_i2	60.4566	18.8973	39.6769	-1.45667	1.45667	0.401644	-3.62677	0.000286993	0.0217472
TR46385|c0_g1_i1	41.3699	123.952	82.6611	1.45433	1.45433	0.409324	3.553	0.000380859	0.0264175
TR52174|c1_g2_i2	78.112	225.387	151.749	1.45268	1.45268	0.307777	4.71991	2.3595e-06	0.000509488
TR3769|c0_g1_i1	119.249	40.6084	79.9289	-1.44831	1.44831	0.346274	-4.18256	2.8825e-05	0.00377447
TR53170|c1_g2_i1	294.109	104.455	199.282	-1.44828	1.44828	0.255361	-5.6715	1.41555e-08	7.2192e-06
TR54542|c0_g1_i2	151.732	52.4167	102.074	-1.43878	1.43878	0.281265	-5.11541	3.13065e-07	9.65406e-05
TR52305|c0_g3_i5	115.831	323.235	219.533	1.43869	1.43869	0.244136	5.89297	3.79312e-09	2.29718e-06	yes
TR42258|c0_g1_i3	34.1982	110.326	72.2622	1.43775	1.43775	0.414345	3.46993	0.000520597	0.0329085
TR47115|c0_g1_i1	256.946	89.163	173.054	-1.43498	1.43498	0.323547	-4.43514	9.20112e-06	0.0015372	yes
TR42969|c0_g1_i2	57.5303	18.7261	38.1282	-1.43414	1.43414	0.405213	-3.53923	0.000401301	0.0273842
TR25867|c0_g1_i1	16.31	52.7832	34.5466	1.42902	1.42902	0.430854	3.31673	0.000910788	0.0476406
TR54640|c1_g1_i4	101.623	304.538	203.081	1.42754	1.42754	0.362956	3.9331	8.38569e-05	0.00863556
TR46025|c0_g1_i1	38.7193	114.012	76.3655	1.42715	1.42715	0.370368	3.85333	0.000116522	0.0111377
TR53843|c1_g3_i1	99.2207	35.0347	67.1277	-1.4261	1.4261	0.324458	-4.39532	1.10609e-05	0.00177521
TR35188|c0_g1_i5	82.1776	28.5411	55.3593	-1.42607	1.42607	0.309402	-4.60912	4.04376e-06	0.000787608
TR42127|c0_g1_i1	271.184	94.5393	182.862	-1.42535	1.42535	0.299172	-4.76431	1.89499e-06	0.00042579
TR53843|c1_g2_i1	201.916	70.4471	136.182	-1.42407	1.42407	0.318029	-4.47779	7.54183e-06	0.00131675
TR46601|c0_g1_i3	68.1585	190.175	129.167	1.42158	1.42158	0.2771	5.13022	2.894e-07	9.1195e-05
TR36617|c0_g1_i2	46.3908	15.4839	30.9373	-1.42119	1.42119	0.389185	-3.6517	0.000260505	0.0202581
TR52771|c0_g2_i18	98.1057	32.9326	65.5192	-1.41999	1.41999	0.393539	-3.60826	0.00030826	0.0229108
TR52145|c1_g2_i1	410.297	149.327	279.812	-1.41936	1.41936	0.234781	-6.04545	1.48994e-09	1.00433e-06	yes
TR54359|c2_g1_i2	62.2754	20.3888	41.3321	-1.41905	1.41905	0.409923	-3.46175	0.000536668	0.033577
TR43964|c0_g1_i2	19.0135	56.7743	37.8939	1.4187	1.4187	0.399489	3.55129	0.000383344	0.0264852
TR51498|c1_g1_i1	1202.23	3284.75	2243.49	1.41741	1.41741	0.203202	6.97537	3.05074e-12	4.29982e-09
TR42072|c0_g3_i3	45.4217	131.544	88.4827	1.4171	1.4171	0.360581	3.93005	8.4927e-05	0.00871981
TR51710|c1_g1_i3	26.8352	76.7872	51.8112	1.41624	1.41624	0.387754	3.65241	0.000259791	0.0202581
TR38612|c0_g1_i1	18.5705	53.9821	36.2763	1.41595	1.41595	0.411171	3.44371	0.000573793	0.0352177
TR47535|c0_g1_i1	38.5795	115.765	77.1721	1.4156	1.4156	0.371992	3.80544	0.00014155	0.0128789
TR1212|c0_g1_i1	133.486	43.7572	88.6217	-1.41528	1.41528	0.412968	-3.42709	0.000610076	0.0365758
TR51388|c2_g5_i3	31.965	89.0083	60.4867	1.41469	1.41469	0.335862	4.21212	2.52982e-05	0.00339877
TR44281|c0_g1_i4	43.4727	130.32	86.8963	1.41309	1.41309	0.390275	3.62075	0.000293753	0.0221518	yes
TR53096|c0_g1_i5	24.9341	73.4127	49.1734	1.41281	1.41281	0.332263	4.25209	2.11783e-05	0.00295274
TR42379|c0_g1_i4	215.563	70.5757	143.069	-1.41174	1.41174	0.417864	-3.37847	0.000728911	0.0414256
TR52872|c1_g2_i2	185.336	60.5713	122.954	-1.40972	1.40972	0.40811	-3.45427	0.000551778	0.0343009
TR32282|c0_g1_i3	40.0641	111.664	75.8639	1.40513	1.40513	0.392782	3.57738	0.000347057	0.0246873
TR53922|c4_g2_i3	125.763	388.607	257.185	1.40472	1.40472	0.417041	3.3683	0.000756322	0.0423622
TR51455|c2_g2_i4	104.395	36.3091	70.352	-1.40433	1.40433	0.354996	-3.95592	7.62416e-05	0.00804106
TR38821|c0_g1_i1	159.988	56.1896	108.089	-1.40401	1.40401	0.336933	-4.16703	3.08598e-05	0.0039849
TR45707|c0_g1_i4	40.2013	122.345	81.2732	1.40371	1.40371	0.380195	3.69208	0.000222426	0.0180926
TR41772|c0_g1_i1	190.551	65.639	128.095	-1.40343	1.40343	0.371869	-3.77399	0.000160657	0.0142494
TR43731|c0_g1_i4	203.087	72.6626	137.875	-1.40127	1.40127	0.257685	-5.43793	5.39044e-08	2.23455e-05
TR51401|c0_g2_i3	1677.77	4962.95	3320.36	1.40034	1.40034	0.390863	3.5827	0.000340063	0.0243186
TR54640|c1_g1_i3	630.509	1775.25	1202.88	1.39945	1.39945	0.313294	4.46689	7.93649e-06	0.00136718
TR54558|c0_g1_i4	90.5773	266.394	178.486	1.39875	1.39875	0.365254	3.82954	0.000128383	0.0119905
TR50924|c0_g1_i3	60.8738	21.0828	40.9783	-1.39544	1.39544	0.372534	-3.7458	0.00017982	0.0156157
TR64949|c0_g1_i1	378.497	1107.93	743.212	1.39361	1.39361	0.38954	3.57757	0.000346802	0.0246873	yes
TR53960|c0_g1_i4	58.4993	19.9101	39.2047	-1.39199	1.39199	0.400999	-3.47132	0.000517909	0.0328273
TR31622|c0_g1_i1	55.3743	18.8684	37.1213	-1.39194	1.39194	0.397519	-3.50156	0.000462543	0.0304165
TR50760|c0_g2_i3	365.467	130.574	248.021	-1.38968	1.38968	0.324411	-4.2837	1.83807e-05	0.00265335	yes
TR52614|c2_g1_i1	100.508	295.512	198.01	1.3881	1.3881	0.412189	3.36762	0.000758199	0.0424303
TR43717|c0_g2_i9	30.5745	86.5772	58.5758	1.38685	1.38685	0.324709	4.27104	1.94561e-05	0.00275726
TR29078|c0_g1_i2	176.463	520.67	348.566	1.38471	1.38471	0.414143	3.34355	0.000827131	0.044838
TR47780|c1_g1_i1	37.1933	12.3897	24.7915	-1.38432	1.38432	0.414723	-3.33795	0.000843983	0.0452429
TR35009|c0_g1_i2	95.9135	291.409	193.661	1.38419	1.38419	0.419429	3.30018	0.000966239	0.049614
TR29273|c0_g1_i1	420.931	155.325	288.128	-1.38411	1.38411	0.251437	-5.5048	3.69578e-08	1.61861e-05
TR40552|c0_g1_i1	124.181	45.9121	85.0466	-1.38408	1.38408	0.268978	-5.1457	2.66519e-07	8.46732e-05
TR47468|c0_g1_i1	489.008	183.128	336.068	-1.38319	1.38319	0.213301	-6.48466	8.89332e-11	7.92416e-08
TR50743|c0_g1_i4	710.781	264.228	487.505	-1.37973	1.37973	0.241151	-5.72142	1.0564e-08	5.57081e-06	yes
TR36711|c0_g1_i1	112.894	305.035	208.964	1.37906	1.37906	0.305998	4.50676	6.58263e-06	0.00117305
TR54037|c2_g2_i1	56.6404	155.434	106.037	1.37628	1.37628	0.334974	4.10861	3.98042e-05	0.00484392
TR54774|c1_g2_i4	276.566	758.615	517.591	1.37518	1.37518	0.294153	4.67506	2.93861e-06	0.000610181
TR43684|c0_g1_i1	128.885	367.057	247.971	1.37323	1.37323	0.381882	3.59595	0.000323213	0.0235924
TR52978|c1_g1_i10	208.278	563.064	385.671	1.37253	1.37253	0.291911	4.70187	2.57788e-06	0.00054688	yes
TR25698|c0_g1_i1	276.281	95.9994	186.14	-1.37197	1.37197	0.381235	-3.59875	0.000319748	0.0234499	yes
TR54855|c3_g1_i3	53.4027	160.86	107.131	1.36962	1.36962	0.400324	3.42128	0.000623279	0.0372234
TR53026|c3_g5_i4	96.2242	279.258	187.741	1.36922	1.36922	0.400486	3.4189	0.000628758	0.0374065
TR51505|c0_g1_i16	175.772	60.4234	118.098	-1.36539	1.36539	0.404313	-3.37707	0.000732631	0.0415152
TR43314|c1_g1_i1	112.391	41.1829	76.7868	-1.36324	1.36324	0.331011	-4.11841	3.81493e-05	0.00468668
TR54517|c4_g8_i1	57.8494	163.067	110.458	1.36033	1.36033	0.367142	3.7052	0.000211224	0.0173452
TR47417|c0_g2_i2	70.4615	24.9757	47.7186	-1.35895	1.35895	0.366573	-3.70719	0.00020957	0.0172662
TR48343|c0_g2_i1	51.4325	139.954	95.6933	1.35568	1.35568	0.325193	4.16885	3.06135e-05	0.00396181
TR45858|c1_g3_i3	124.767	339.267	232.017	1.35275	1.35275	0.270162	5.00717	5.5236e-07	0.000154023
TR46240|c0_g2_i4	38.9492	103.301	71.1249	1.35088	1.35088	0.358757	3.76545	0.000166249	0.0145786
TR52290|c2_g1_i4	82.8953	229.573	156.234	1.34441	1.34441	0.3234	4.1571	3.2232e-05	0.00410953
TR54075|c0_g1_i6	24.31	68.1591	46.2346	1.34417	1.34417	0.380168	3.53572	0.000406661	0.0276768
TR34883|c0_g1_i1	15140	5876.75	10508.4	-1.34395	1.34395	0.156456	-8.58996	8.70014e-18	3.54961e-14
TR10310|c0_g1_i1	1745.44	664.502	1204.97	-1.34292	1.34292	0.238965	-5.61976	1.91225e-08	9.2072e-06
TR47293|c0_g1_i7	105.345	37.0093	71.1772	-1.34146	1.34146	0.383541	-3.49757	0.000469525	0.0307149
TR28527|c0_g1_i1	2009.94	723.336	1366.64	-1.3412	1.3412	0.36765	-3.64804	0.000264252	0.0204846	yes
TR42491|c0_g1_i1	39.0489	109.608	74.3284	1.34109	1.34109	0.399229	3.35921	0.000781656	0.0431268
TR43533|c0_g1_i1	37.4547	104.042	70.7485	1.33809	1.33809	0.370482	3.61175	0.000304134	0.0226912
TR52050|c1_g5_i3	35.6052	96.6469	66.126	1.3351	1.3351	0.360141	3.70716	0.000209594	0.0172662	yes
TR44957|c0_g1_i5	98.1514	35.6727	66.912	-1.33202	1.33202	0.369843	-3.60158	0.000316287	0.0232621
TR47082|c0_g1_i2	98.72	35.9073	67.3136	-1.33187	1.33187	0.395361	-3.36875	0.000755091	0.0423238	yes
TR47657|c0_g1_i4	181.064	67.4404	124.252	-1.33091	1.33091	0.286698	-4.64218	3.44745e-06	0.000694137
TR54542|c0_g1_i1	148.445	56.3171	102.381	-1.33084	1.33084	0.311687	-4.26981	1.95642e-05	0.00276248
TR41380|c0_g1_i4	117.367	320.012	218.69	1.32861	1.32861	0.327012	4.06288	4.8472e-05	0.00567598
TR49248|c0_g1_i3	395.079	150.234	272.656	-1.32757	1.32757	0.275014	-4.82729	1.38406e-06	0.000326113
TR53922|c4_g1_i2	448.061	161.913	304.987	-1.32739	1.32739	0.377604	-3.51529	0.000439268	0.0293296
TR44841|c0_g1_i2	111.453	40.7198	76.0866	-1.32629	1.32629	0.328505	-4.03737	5.40543e-05	0.00620775
TR41948|c0_g1_i1	147.39	377.412	262.401	1.32376	1.32376	0.243058	5.44628	5.14337e-08	2.1669e-05
TR42203|c0_g1_i2	58.5549	150.938	104.746	1.32366	1.32366	0.28376	4.66471	3.09055e-06	0.00063548
TR43320|c0_g1_i1	75.7442	205.633	140.689	1.32357	1.32357	0.336615	3.932	8.42425e-05	0.008661
TR41858|c0_g1_i1	57.8383	147.797	102.818	1.32201	1.32201	0.322815	4.09525	4.2171e-05	0.00507616	yes
TR47008|c0_g2_i1	21.0545	57.9966	39.5256	1.32049	1.32049	0.384254	3.43651	0.000589259	0.0359141
TR44256|c0_g1_i2	146.136	392.458	269.297	1.3188	1.3188	0.347401	3.79618	0.000146942	0.013276
TR52936|c0_g1_i2	62.2892	23.0902	42.6897	-1.31828	1.31828	0.376774	-3.49887	0.000467241	0.0306311
TR54866|c8_g4_i1	29.3457	80.3761	54.8609	1.31746	1.31746	0.355958	3.70115	0.000214623	0.0175871	yes
TR51526|c0_g1_i5	141.638	53.6706	97.6542	-1.31668	1.31668	0.307078	-4.28778	1.80466e-05	0.00261934
TR44228|c0_g1_i2	98.1239	266.035	182.079	1.316	1.316	0.337973	3.89381	9.86839e-05	0.00979497
TR46250|c0_g2_i2	33.251	88.2269	60.739	1.31524	1.31524	0.392169	3.35375	0.000797256	0.0437076
TR32027|c0_g2_i3	77.8507	194.97	136.41	1.31483	1.31483	0.236718	5.55441	2.78548e-08	1.24814e-05
TR47684|c0_g1_i3	39.7714	104.5	72.1357	1.31393	1.31393	0.283482	4.63497	3.56995e-06	0.000713245
TR52797|c1_g1_i4	146.814	55.9273	101.371	-1.31351	1.31351	0.311817	-4.21245	2.52615e-05	0.00339877
TR48937|c0_g1_i7	75.3371	208.933	142.135	1.31058	1.31058	0.373853	3.50561	0.000455558	0.030106
TR54876|c3_g6_i2	21.9718	60.6053	41.2886	1.30769	1.30769	0.395039	3.31027	0.000932051	0.0484099
TR49150|c0_g1_i2	143.816	55.9594	99.8879	-1.30521	1.30521	0.262903	-4.96462	6.88363e-07	0.000184004	yes
TR46799|c0_g1_i2	45.4547	118.972	82.2134	1.30415	1.30415	0.394076	3.30939	0.000934985	0.048481
TR16771|c0_g2_i1	763.803	301.599	532.701	-1.30302	1.30302	0.230846	-5.64457	1.65597e-08	8.12461e-06
TR45707|c0_g1_i8	42.1783	106.79	74.4841	1.30194	1.30194	0.358547	3.63114	0.000282173	0.0215081
TR52371|c0_g1_i3	90.394	35.0042	62.6991	-1.30057	1.30057	0.302729	-4.29614	1.738e-05	0.0025565
TR49502|c0_g1_i1	29.4079	79.9649	54.6864	1.30047	1.30047	0.330529	3.9345	8.33708e-05	0.0086171
TR52783|c0_g1_i13	88.5014	32.0455	60.2734	-1.29862	1.29862	0.362061	-3.58676	0.000334817	0.0240916
TR52321|c0_g2_i1	147.866	55.9831	101.925	-1.29817	1.29817	0.322533	-4.02493	5.69922e-05	0.00644961
TR50202|c0_g1_i7	45.8631	122.981	84.4219	1.29793	1.29793	0.291862	4.44708	8.70462e-06	0.00147653
TR54855|c4_g3_i1	39.3136	103.709	71.5111	1.29716	1.29716	0.360281	3.60043	0.000317695	0.0233435
TR53665|c0_g1_i1	110.258	279.777	195.017	1.29657	1.29657	0.228737	5.66838	1.44158e-08	7.27706e-06
TR5918|c0_g1_i1	192.328	74.0743	133.201	-1.29534	1.29534	0.320456	-4.04218	5.29569e-05	0.0060998	yes
TR38845|c0_g2_i1	42.6676	111.79	77.2289	1.29202	1.29202	0.330388	3.91061	9.20651e-05	0.0092927
TR52978|c1_g1_i7	187.438	497.121	342.28	1.29098	1.29098	0.361543	3.57077	0.000355937	0.025175	yes
TR51468|c0_g7_i3	343.753	860.155	601.954	1.29018	1.29018	0.228235	5.65285	1.57807e-08	7.84171e-06
TR48851|c5_g1_i3	175.032	442.98	309.006	1.28909	1.28909	0.23685	5.44263	5.25e-08	2.18804e-05
TR52975|c0_g1_i5	80.4308	207.947	144.189	1.28827	1.28827	0.365995	3.51991	0.00043169	0.0289984	yes
TR38501|c0_g1_i2	75.6782	194.158	134.918	1.28786	1.28786	0.279137	4.61371	3.95535e-06	0.000778211
TR48113|c0_g1_i1	503.002	201.216	352.109	-1.28398	1.28398	0.196642	-6.52952	6.5979e-11	6.1622e-08
TR44834|c0_g1_i3	111.52	41.8987	76.7093	-1.28226	1.28226	0.37313	-3.43649	0.00058931	0.0359141
TR54015|c4_g3_i1	63.9003	163.103	113.501	1.28196	1.28196	0.342638	3.74143	0.000182977	0.0158305
TR50716|c2_g1_i5	53.5402	20.2086	36.8744	-1.28019	1.28019	0.380654	-3.36312	0.000770668	0.0427929
TR43402|c0_g1_i2	143.636	55.2448	99.4406	-1.28004	1.28004	0.339455	-3.77087	0.000162679	0.0143467
TR45369|c0_g1_i1	112.98	43.2537	78.1171	-1.27718	1.27718	0.344682	-3.70538	0.000211076	0.0173452
TR36456|c1_g1_i2	44.2854	116.219	80.2524	1.27675	1.27675	0.315376	4.04835	5.15791e-05	0.00597662
TR52124|c1_g1_i5	138.89	361.045	249.967	1.27668	1.27668	0.329018	3.88026	0.000104344	0.0102	yes
TR54774|c1_g1_i2	62.2787	159.968	111.123	1.27411	1.27411	0.328484	3.87874	0.000104998	0.0102382
TR34898|c0_g1_i2	340.031	136.031	238.031	-1.27188	1.27188	0.259471	-4.90181	9.49587e-07	0.000238997
TR25404|c0_g1_i1	195.234	507.105	351.169	1.27061	1.27061	0.325525	3.90326	9.49044e-05	0.00951733
TR52757|c1_g1_i1	100.891	272.026	186.458	1.26794	1.26794	0.375802	3.37395	0.00074097	0.0418044
TR45194|c0_g1_i6	333.618	132.332	232.975	-1.26344	1.26344	0.292965	-4.31261	1.6134e-05	0.00242358
TR51781|c0_g1_i3	40.2881	101.031	70.6593	1.26286	1.26286	0.339629	3.71836	0.000200522	0.0167865
TR47321|c0_g1_i4	80.9681	31.6003	56.2842	-1.26098	1.26098	0.339207	-3.71744	0.000201251	0.0168293
TR82693|c0_g1_i1	37.1977	96.252	66.7249	1.25901	1.25901	0.327647	3.84259	0.000121743	0.011509
TR31165|c0_g1_i1	210.276	525.771	368.024	1.25707	1.25707	0.302725	4.15252	3.28839e-05	0.00417986
TR51678|c1_g1_i1	74.665	186.003	130.334	1.25648	1.25648	0.342484	3.66872	0.000243771	0.0193933
TR52702|c1_g1_i1	3778.46	1513.57	2646.02	-1.25587	1.25587	0.277084	-4.53244	5.83054e-06	0.00106348	yes
TR43402|c0_g1_i7	175.867	69.1607	122.514	-1.2532	1.2532	0.332599	-3.7679	0.000164627	0.0144855
TR54671|c1_g4_i2	98.497	39.5102	69.0036	-1.25236	1.25236	0.310885	-4.02837	5.61644e-05	0.00639326
TR54473|c0_g1_i9	42.2934	108.742	75.5178	1.25234	1.25234	0.371391	3.37203	0.000746158	0.0419749
TR43502|c0_g1_i1	60.4826	23.5193	42.0009	-1.25133	1.25133	0.365715	-3.42159	0.000622559	0.037209
TR50556|c2_g2_i2	24.8355	63.5388	44.1872	1.25132	1.25132	0.349389	3.58145	0.000341688	0.0244123
TR54227|c0_g3_i3	33.3815	88.3769	60.8792	1.25024	1.25024	0.343156	3.64335	0.00026911	0.0207367
TR8978|c0_g1_i1	32.6259	84.5175	58.5717	1.24919	1.24919	0.368423	3.39064	0.000697293	0.0399803
TR64872|c0_g1_i1	173.97	70.4795	122.225	-1.24573	1.24573	0.301301	-4.13452	3.55704e-05	0.00443309
TR47075|c0_g1_i1	33.7981	88.375	61.0865	1.24527	1.24527	0.339624	3.66663	0.000245772	0.0194885
TR39400|c0_g1_i3	215.428	552.76	384.094	1.24404	1.24404	0.357481	3.48	0.000501408	0.0320963
TR35271|c0_g1_i1	107.174	264.96	186.067	1.24307	1.24307	0.301929	4.1171	3.83667e-05	0.00469109
TR52124|c1_g1_i1	144.389	351.782	248.085	1.24143	1.24143	0.26502	4.6843	2.80923e-06	0.000590158	yes
TR43965|c0_g1_i2	216.957	87.7975	152.377	-1.2388	1.2388	0.311408	-3.97806	6.948e-05	0.00752164	yes
TR1977|c0_g1_i1	288.726	697.892	493.309	1.23752	1.23752	0.237162	5.21805	1.80816e-07	6.20208e-05
TR54670|c2_g1_i1	49.5098	122.376	85.9428	1.23638	1.23638	0.344119	3.59287	0.000327052	0.0237904
TR26908|c0_g1_i3	72.2371	173.85	123.044	1.23389	1.23389	0.309174	3.99092	6.58169e-05	0.00723697
TR41413|c0_g2_i2	69.6999	175.376	122.538	1.22919	1.22919	0.341651	3.59781	0.000320906	0.0234682
TR41084|c0_g1_i2	56.9519	140.27	98.6109	1.22801	1.22801	0.345911	3.55007	0.000385129	0.0265613
TR49900|c0_g1_i5	160.407	397.153	278.78	1.22363	1.22363	0.277293	4.41276	1.02062e-05	0.00166914
TR41858|c0_g1_i4	129.122	311.484	220.303	1.22211	1.22211	0.288574	4.23498	2.28568e-05	0.00310848	yes
TR43541|c0_g1_i1	36.2452	92.9066	64.5759	1.21753	1.21753	0.339129	3.59018	0.000330451	0.0239145
TR44957|c0_g1_i2	433.105	174.885	303.995	-1.21564	1.21564	0.330299	-3.68042	0.000232851	0.018705
TR54369|c0_g2_i4	221.545	89.3389	155.442	-1.2154	1.2154	0.356775	-3.40663	0.000657714	0.0386252
TR54169|c1_g2_i2	39.1364	98.065	68.6007	1.21376	1.21376	0.365011	3.32527	0.000883316	0.0465808
TR44859|c0_g4_i2	27.7042	71.4591	49.5816	1.20911	1.20911	0.344604	3.5087	0.000450303	0.0298861
TR48795|c2_g3_i1	42.0474	100.812	71.4295	1.20885	1.20885	0.282844	4.27389	1.92091e-05	0.00273726
TR44957|c0_g1_i4	601.339	248.872	425.105	-1.20664	1.20664	0.29149	-4.13957	3.47956e-05	0.00437168
TR49186|c0_g1_i11	191.868	79.4514	135.66	-1.20334	1.20334	0.244472	-4.92219	8.55813e-07	0.000219954
TR47402|c1_g2_i3	37.6297	94.7069	66.1683	1.20263	1.20263	0.335557	3.58397	0.000338414	0.0242679
TR54855|c5_g7_i8	56.6113	142.96	99.7857	1.20229	1.20229	0.361385	3.32689	0.000878218	0.04647
TR36700|c0_g1_i3	328.145	132.15	230.147	-1.20226	1.20226	0.345912	-3.47563	0.000509651	0.0324632
TR45663|c0_g3_i3	33.9896	85.6865	59.838	1.20166	1.20166	0.360787	3.33067	0.000866382	0.0460007
TR49459|c0_g2_i3	129.675	54.1727	91.9239	-1.19958	1.19958	0.30545	-3.92726	8.59205e-05	0.00879667
TR22826|c0_g1_i1	69.5568	174.267	121.912	1.19829	1.19829	0.355422	3.37144	0.000747751	0.042034
TR52743|c0_g2_i1	104.537	255.582	180.059	1.19794	1.19794	0.332936	3.59811	0.000320534	0.0234682
TR36236|c1_g1_i1	818.137	352.885	585.511	-1.19643	1.19643	0.155629	-7.68771	1.49787e-14	3.87044e-11	yes
TR20240|c0_g2_i1	62.8465	150.155	106.501	1.19626	1.19626	0.322584	3.70835	0.000208614	0.0172405
TR48984|c3_g2_i3	83.7762	34.6737	59.2249	-1.19559	1.19559	0.302663	-3.95023	7.80769e-05	0.00817898
TR40319|c0_g1_i3	291.668	124.303	207.985	-1.19347	1.19347	0.210567	-5.66789	1.44567e-08	7.27706e-06
TR51216|c1_g1_i4	622.405	258.344	440.375	-1.19327	1.19327	0.295182	-4.04249	5.28872e-05	0.0060998
TR38013|c0_g1_i1	80.2603	188.543	134.402	1.19075	1.19075	0.301406	3.95065	7.79394e-05	0.00817898
TR35208|c0_g1_i2	91.2095	37.4675	64.3385	-1.19025	1.19025	0.34563	-3.44372	0.000573774	0.0352177
TR48790|c1_g1_i1	60.7038	150.034	105.369	1.19014	1.19014	0.341207	3.48803	0.000486592	0.0314073
TR49526|c0_g2_i1	29.9697	75.2824	52.6261	1.18962	1.18962	0.340173	3.49711	0.000470331	0.0307313
TR37165|c0_g1_i1	1260.24	530.311	895.274	-1.18769	1.18769	0.283807	-4.18486	2.85337e-05	0.00374456	yes
TR47690|c0_g1_i1	172.82	405.803	289.312	1.18655	1.18655	0.26706	4.44301	8.87107e-06	0.00149395
TR37263|c0_g2_i2	44.9325	108.578	76.7552	1.18492	1.18492	0.349116	3.39405	0.00068867	0.0396914
TR41543|c0_g4_i1	91.0856	219.191	155.138	1.18375	1.18375	0.340221	3.47937	0.000502603	0.0321393
TR39440|c0_g1_i1	116.104	275.059	195.582	1.18344	1.18344	0.285412	4.14643	3.37703e-05	0.00426358
TR49251|c0_g2_i1	260.526	622.41	441.468	1.18326	1.18326	0.261041	4.53284	5.81972e-06	0.00106348
TR41539|c0_g1_i1	45.4118	105.058	75.2349	1.18291	1.18291	0.351714	3.36329	0.000770207	0.0427929
TR49080|c6_g1_i1	116.479	279.005	197.742	1.18229	1.18229	0.303284	3.89829	9.68758e-05	0.00967747
TR19717|c0_g1_i1	26.6113	63.0362	44.8238	1.1822	1.1822	0.339646	3.4807	0.000500104	0.0320658
TR46329|c1_g4_i5	85.2548	201.541	143.398	1.18123	1.18123	0.288398	4.09583	4.20655e-05	0.00507134
TR43296|c0_g1_i1	123.881	293.715	208.798	1.17813	1.17813	0.316334	3.72433	0.000195832	0.016591
TR48398|c0_g3_i1	71.2248	173.531	122.378	1.17739	1.17739	0.320016	3.67918	0.000233988	0.0187575
TR48743|c0_g1_i1	49.5704	121.021	85.2957	1.17702	1.17702	0.342068	3.44091	0.000579767	0.035528
TR52941|c0_g2_i3	952.552	416.435	684.494	-1.17537	1.17537	0.165495	-7.10213	1.22847e-12	1.86726e-09
TR51152|c0_g1_i3	321.812	138.519	230.166	-1.17516	1.17516	0.251184	-4.67849	2.89001e-06	0.000603857
TR50028|c1_g2_i3	241.662	104.08	172.871	-1.17416	1.17416	0.23331	-5.03261	4.83837e-07	0.000138401
TR24756|c0_g1_i3	76.6373	175.238	125.938	1.17225	1.17225	0.236601	4.95453	7.25042e-07	0.000193143
TR29047|c1_g1_i2	36.0889	88.3908	62.2399	1.17013	1.17013	0.335	3.49294	0.000477737	0.0309905
TR47008|c0_g1_i1	52.8215	124.436	88.6286	1.16996	1.16996	0.289985	4.03454	5.47104e-05	0.0062738
TR31789|c0_g2_i1	1029.09	2385.25	1707.17	1.16907	1.16907	0.236688	4.93927	7.84139e-07	0.000205357
TR42939|c0_g1_i1	97.0276	232.947	164.987	1.16876	1.16876	0.353731	3.30409	0.000952847	0.0491556
TR36510|c0_g1_i1	116.902	278.315	197.608	1.16798	1.16798	0.344529	3.39009	0.000698702	0.0400315
TR31249|c0_g1_i1	552.209	240.625	396.417	-1.16694	1.16694	0.221923	-5.25831	1.45386e-07	5.12281e-05
TR52322|c0_g1_i6	94.0121	227.976	160.994	1.16643	1.16643	0.344296	3.38788	0.000704351	0.0402659
TR53980|c0_g1_i1	202.584	484.123	343.354	1.16529	1.16529	0.327278	3.56054	0.000370088	0.0258458
TR53806|c0_g1_i10	144.815	60.9297	102.872	-1.16423	1.16423	0.314139	-3.70609	0.000210486	0.0173213
TR50028|c0_g1_i1	108.497	245.564	177.031	1.16303	1.16303	0.227853	5.10428	3.3206e-07	0.000101136
TR49683|c0_g2_i6	47.8958	107.972	77.9339	1.16286	1.16286	0.312363	3.72279	0.000197033	0.0166451
TR52200|c0_g1_i8	87.494	205.062	146.278	1.16187	1.16187	0.24602	4.72265	2.32787e-06	0.000504062
TR26269|c0_g1_i1	105.45	239.964	172.707	1.16105	1.16105	0.27196	4.26917	1.962e-05	0.00276531
TR52644|c0_g1_i3	416.131	174.671	295.401	-1.16004	1.16004	0.333926	-3.47395	0.000512851	0.0325866	yes
TR32234|c5_g6_i5	2272.53	995.327	1633.93	-1.15792	1.15792	0.205287	-5.6405	1.69561e-08	8.26678e-06
TR49541|c1_g2_i3	578.908	1340.38	959.647	1.15652	1.15652	0.257889	4.48455	7.30675e-06	0.00128148
TR50541|c2_g10_i3	71.7855	171.109	121.447	1.15517	1.15517	0.329417	3.50672	0.000453669	0.0300324
TR54774|c1_g2_i1	267.698	619.087	443.392	1.15223	1.15223	0.285892	4.03032	5.57014e-05	0.00635916
TR51582|c2_g1_i2	55.9317	129.177	92.5542	1.15128	1.15128	0.284272	4.04994	5.1231e-05	0.00594517
TR42479|c0_g1_i2	139.251	59.6271	99.4388	-1.15078	1.15078	0.296159	-3.8857	0.000102036	0.0100377
TR26062|c0_g1_i1	50.2941	122.837	86.5655	1.14319	1.14319	0.341943	3.34322	0.00082811	0.0448504
TR54143|c1_g2_i4	124.276	54.5848	89.4305	-1.14024	1.14024	0.287529	-3.96564	7.32005e-05	0.00778386
TR44715|c0_g1_i5	394.649	171.121	282.885	-1.13961	1.13961	0.268112	-4.2505	2.13297e-05	0.00296506
TR18329|c0_g1_i2	48.045	114.151	81.098	1.13786	1.13786	0.319083	3.56602	0.000362445	0.0254496
TR42049|c0_g2_i2	232.186	526.347	379.267	1.13743	1.13743	0.207045	5.49363	3.93749e-08	1.69572e-05
TR53558|c0_g2_i3	65.8655	155.3	110.583	1.13699	1.13699	0.334849	3.39554	0.000684937	0.0395645
TR51136|c0_g1_i8	83.2435	35.7592	59.5014	-1.13632	1.13632	0.319638	-3.55502	0.000377949	0.0263091
TR50340|c0_g1_i2	173.461	403.994	288.727	1.13311	1.13311	0.319862	3.54249	0.000396369	0.0271193
TR36712|c0_g1_i1	195.26	85.8932	140.576	-1.13171	1.13171	0.236275	-4.78979	1.66958e-06	0.000382912
TR54385|c0_g1_i1	345.149	151.234	248.192	-1.13078	1.13078	0.27769	-4.0721	4.65914e-05	0.00550958
TR47385|c2_g2_i1	87.9513	38.319	63.1351	-1.12955	1.12955	0.331172	-3.41076	0.000647809	0.0383001
TR49967|c6_g7_i3	166.854	73.0099	119.932	-1.1287	1.1287	0.332827	-3.39125	0.000695742	0.0399349
TR53558|c0_g1_i1	662.134	1453.67	1057.9	1.12603	1.12603	0.119905	9.39104	5.94095e-21	3.8378e-17
TR16679|c0_g1_i1	3084.24	7017.98	5051.11	1.12532	1.12532	0.283536	3.96889	7.22077e-05	0.00773434	yes
TR48522|c0_g2_i1	49.337	112.661	80.9989	1.12516	1.12516	0.322232	3.49178	0.000479818	0.0310735
TR54586|c1_g1_i3	37.4068	84.5591	60.9829	1.12374	1.12374	0.314335	3.57499	0.000350248	0.0248634
TR53385|c1_g1_i3	104.789	46.1124	75.4507	-1.1173	1.1173	0.311521	-3.58659	0.000335024	0.0240916
TR51156|c1_g1_i1	5256.06	2370.51	3813.28	-1.11581	1.11581	0.214885	-5.19258	2.07402e-07	6.95999e-05	yes
TR53558|c0_g2_i1	92.1868	205.279	148.733	1.11478	1.11478	0.231549	4.81445	1.47607e-06	0.000343614
TR25472|c0_g1_i1	298.501	133.201	215.851	-1.11406	1.11406	0.280818	-3.9672	7.2722e-05	0.00775775
TR47671|c0_g1_i1	423.919	189.042	306.48	-1.11106	1.11106	0.290765	-3.82116	0.000132824	0.0122573
TR37540|c0_g1_i1	1212.51	543.572	878.042	-1.10674	1.10674	0.260182	-4.2537	2.10267e-05	0.00294219
TR41538|c0_g1_i2	153.547	336.978	245.263	1.10631	1.10631	0.257489	4.29653	1.73496e-05	0.0025565
TR28713|c0_g1_i1	169.686	74.6368	122.162	-1.10109	1.10109	0.301309	-3.65436	0.000257829	0.0201276
TR65560|c0_g1_i1	179.679	396.003	287.841	1.09882	1.09882	0.236744	4.6414	3.46065e-06	0.00069499
TR34010|c0_g1_i1	72.0942	163.653	117.873	1.09847	1.09847	0.293881	3.73781	0.00018563	0.0159652
TR47601|c0_g1_i5	88.9736	39.3991	64.1863	-1.09615	1.09615	0.293056	-3.74042	0.000183715	0.0158546
TR51042|c0_g1_i4	173.934	388.979	281.456	1.09465	1.09465	0.274341	3.99012	6.60408e-05	0.0072513
TR44403|c1_g1_i1	92.1707	203.018	147.595	1.09118	1.09118	0.326793	3.33906	0.000840639	0.0451597
TR54613|c1_g21_i2	98.7709	220.377	159.574	1.09099	1.09099	0.326439	3.3421	0.000831467	0.044916
TR49234|c0_g1_i4	177.638	79.3246	128.481	-1.08908	1.08908	0.32602	-3.34054	0.000836142	0.045043
TR47470|c0_g1_i2	579.241	1276.89	928.065	1.08891	1.08891	0.289392	3.76274	0.000168065	0.0147046
TR52660|c2_g1_i5	1160.42	536.1	848.261	-1.08707	1.08707	0.204671	-5.31131	1.08837e-07	4.11559e-05
TR45070|c1_g1_i3	378.091	170.31	274.2	-1.08684	1.08684	0.272192	-3.9929	6.52703e-05	0.0072241
TR21601|c0_g1_i1	158.716	72.8641	115.79	-1.08476	1.08476	0.248488	-4.36544	1.26865e-05	0.00196691
TR49484|c0_g1_i1	183.014	400.029	291.522	1.08196	1.08196	0.256036	4.2258	2.38095e-05	0.00322673
TR52305|c0_g3_i4	99.3916	220.042	159.717	1.08182	1.08182	0.315394	3.43007	0.000603421	0.0364304	yes
TR44834|c0_g1_i1	461.6	212.09	336.845	-1.08052	1.08052	0.252021	-4.2874	1.80775e-05	0.00261934
TR41858|c0_g1_i2	118.092	251.075	184.584	1.07958	1.07958	0.265229	4.07035	4.69433e-05	0.00553039	yes
TR54817|c2_g1_i4	171.884	387.543	279.714	1.07835	1.07835	0.311485	3.46197	0.00053623	0.033577
TR46192|c0_g1_i2	160.733	359.744	260.238	1.07713	1.07713	0.323159	3.33312	0.000858786	0.0457541	yes
TR43609|c0_g1_i2	265.184	120.147	192.665	-1.07392	1.07392	0.283312	-3.7906	0.000150284	0.0134681
TR44468|c0_g1_i5	79.4762	35.5369	57.5066	-1.07275	1.07275	0.324524	-3.3056	0.000947724	0.0490104
TR51216|c1_g1_i7	257.907	118.039	187.973	-1.07273	1.07273	0.308127	-3.48145	0.000498707	0.0320282
TR52589|c0_g1_i4	134.188	59.8662	97.0273	-1.07246	1.07246	0.289245	-3.70781	0.000209059	0.0172588
TR48537|c0_g1_i2	339.721	745.625	542.673	1.07244	1.07244	0.284214	3.77334	0.000161076	0.0142539
TR53443|c1_g1_i17	119.417	54.7012	87.0589	-1.07034	1.07034	0.294933	-3.62911	0.000284404	0.021623
TR51784|c0_g1_i10	102.333	46.0907	74.2118	-1.06823	1.06823	0.320572	-3.33226	0.00086145	0.045833
TR36521|c0_g1_i1	46.3842	102.877	74.6304	1.06206	1.06206	0.295117	3.59878	0.000319715	0.0234499
TR32327|c0_g1_i1	227.834	483.667	355.75	1.06139	1.06139	0.22638	4.68852	2.7519e-06	0.000579687
TR43075|c0_g1_i1	45.8477	101.919	73.8832	1.06056	1.06056	0.303559	3.49375	0.000476283	0.0309221
TR52644|c0_g1_i4	872.053	397.163	634.608	-1.06024	1.06024	0.320893	-3.30403	0.000953067	0.0491556	yes
TR22216|c0_g1_i1	438.243	200.937	319.59	-1.0602	1.0602	0.310688	-3.41241	0.000643906	0.0381321
TR16372|c0_g1_i1	75.4481	162.073	118.76	1.05969	1.05969	0.289106	3.66541	0.000246941	0.0194935
TR50340|c0_g1_i5	175.093	379.383	277.238	1.05631	1.05631	0.268963	3.92734	8.5891e-05	0.00879667
TR54765|c0_g5_i6	117.155	53.3658	85.2607	-1.05601	1.05601	0.312905	-3.37487	0.000738502	0.0417259
TR50157|c5_g6_i3	208.611	98.7281	153.67	-1.05485	1.05485	0.227473	-4.63724	3.53096e-06	0.000707277
TR51268|c0_g2_i3	142.144	65.7258	103.935	-1.05092	1.05092	0.31412	-3.34562	0.000820998	0.0446364	yes
TR25543|c0_g1_i2	137.719	286.657	212.188	1.05033	1.05033	0.212176	4.95027	7.41102e-07	0.000196283
TR45438|c0_g1_i4	87.1153	180.453	133.784	1.04966	1.04966	0.251399	4.17527	2.97632e-05	0.00387117
TR45656|c1_g1_i1	182.383	391.219	286.801	1.0496	1.0496	0.304608	3.44572	0.000569532	0.035123
TR47686|c0_g1_i1	2997.03	1420.58	2208.81	-1.04557	1.04557	0.220228	-4.74768	2.05762e-06	0.000455728
TR47977|c0_g1_i1	63.7484	133.046	98.3973	1.04464	1.04464	0.296101	3.52798	0.000418751	0.0282761
TR52477|c1_g1_i2	545.071	1150.39	847.731	1.04442	1.04442	0.194888	5.35907	8.36533e-08	3.27511e-05
TR54821|c0_g2_i1	107.011	49.9051	78.458	-1.04178	1.04178	0.303345	-3.4343	0.00059409	0.0360637
TR36381|c0_g11_i3	86.5937	40.611	63.6023	-1.04127	1.04127	0.281847	-3.69446	0.000220358	0.0179432
TR51011|c0_g2_i9	277.832	128.47	203.151	-1.03989	1.03989	0.289826	-3.58797	0.000333263	0.0240318
TR39783|c0_g1_i1	299.183	142.93	221.056	-1.03411	1.03411	0.240155	-4.30601	1.66229e-05	0.0024733
TR53340|c0_g1_i2	116.642	55.4163	86.0292	-1.03366	1.03366	0.249871	-4.13676	3.52244e-05	0.00441125
TR51148|c1_g1_i6	345.961	163.386	254.674	-1.03359	1.03359	0.261649	-3.95031	7.80496e-05	0.00817898
TR54700|c0_g3_i3	44.7229	95.766	70.2445	1.03328	1.03328	0.306891	3.36694	0.000760071	0.0424801
TR49186|c0_g1_i6	102.785	47.9839	75.3846	-1.03	1.03	0.289199	-3.56157	0.00036864	0.0257912
TR51291|c2_g2_i2	101.113	210.083	155.598	1.02901	1.02901	0.262725	3.91668	8.97766e-05	0.00910915
TR49978|c2_g2_i1	294.078	143.024	218.551	-1.0244	1.0244	0.197749	-5.18031	2.21518e-07	7.30716e-05
TR44956|c0_g1_i1	744.862	1569.76	1157.31	1.024	1.024	0.279364	3.66548	0.000246877	0.0194935
TR46713|c0_g1_i1	93.0287	195.658	144.343	1.02248	1.02248	0.238287	4.29095	1.7791e-05	0.00260216
TR32857|c0_g1_i1	617.141	290.779	453.96	-1.02063	1.02063	0.306547	-3.32942	0.000870272	0.0461756
TR31036|c0_g1_i1	55.0402	116.824	85.9323	1.0195	1.0195	0.305277	3.33958	0.00083904	0.0451364
TR43270|c0_g1_i3	111.919	53.8833	82.9009	-1.01665	1.01665	0.293839	-3.45989	0.000540395	0.0337264
TR35642|c0_g2_i1	160.576	323.509	242.042	1.0151	1.0151	0.210527	4.82169	1.42349e-06	0.000334385
TR52229|c1_g4_i1	77.1838	163.235	120.209	1.01412	1.01412	0.268918	3.77112	0.000162517	0.0143467
TR44789|c0_g1_i2	377.677	181.022	279.35	-1.01052	1.01052	0.294157	-3.43529	0.000591926	0.0360051
TR52644|c0_g1_i1	507.451	243.317	375.384	-1.01032	1.01032	0.272434	-3.70848	0.000208503	0.0172405
TR53517|c4_g1_i3	195.624	95.1312	145.377	-1.00997	1.00997	0.256618	-3.9357	8.29559e-05	0.00858566
TR46770|c0_g1_i4	142.922	69.2849	106.103	-1.00829	1.00829	0.253482	-3.97775	6.95702e-05	0.00752164
TR9547|c0_g1_i1	110.806	52.0023	81.404	-1.00754	1.00754	0.305032	-3.30305	0.000956397	0.0492618
TR52301|c0_g1_i3	169.754	348.586	259.17	1.00473	1.00473	0.274824	3.65591	0.000256269	0.0200259	yes
TR43276|c0_g1_i1	106.738	227.106	166.922	1.0045	1.0045	0.302813	3.31722	0.000909185	0.0475889
TR53747|c0_g2_i6	260.236	124.728	192.482	-1.00067	1.00067	0.295593	-3.38529	0.000711023	0.0405875

## Sheet: Table S3
Table S3. Results for the gene differential expression analysis across both 'Marsh' and 'Star Ruby' plants.
Transcript	Marsh_L2FC	StarRuby_L2FC	Marsh_padj	StarRuby_padj	GO	blastn	Disease_response	Membrane	Chloroplast
TR25698|c0_g1_i1	-1.13919	-1.37197	0.00606048	0.0234499		PREDICTED: Citrus sinensis aquaporin PIP2-1 (LOC102627699), mRNA		Yes
TR52386|c3_g1_i17	2.25339	.	0.0338133	.		PREDICTED: Citrus sinensis putative disease resistance protein RGA3 (LOC102624809), transcript variant X12, mRNA	Yes
TR52386|c3_g1_i7	.	2.22634	.	0.0311315		PREDICTED: Citrus sinensis putative disease resistance protein RGA3 (LOC102624809), transcript variant X12, mRNA
TR54866|c8_g5_i8	1.60374	2.9492	0.00527468	9.70453e-06	GO:0003674,GO:0005488,GO:0005515	PREDICTED: Citrus sinensis TMV resistance protein N-like (LOC102615313), partial mRNA	Yes	Yes
TR54866|c8_g5_i5	1.20821	.	0.0443553	.	GO:0003674,GO:0005488,GO:0005515	PREDICTED: Citrus sinensis TMV resistance protein N-like (LOC102615313), partial mRNA		Yes
TR54866|c8_g4_i1	1.46932	1.31746	0.0130739	0.0175871	GO:0003674,GO:0005488,GO:0005515	Citrus clementina hypothetical protein (CICLE_v10024485mg) mRNA, partial cds
TR54866|c8_g1_i2	2.12432	2.43073	0.000411	2.01262e-13	GO:0000166,GO:0001882,GO:0001883,GO:0003674,GO:0005488,GO:0005515,GO:0007165,GO:0008150,GO:0017076,GO:0030554,GO:0032549,GO:0032550,GO:0032553,GO:0032555,GO:0032559,GO:0036094,GO:0043167,GO:0043168,GO:0043531,GO:0050789,GO:0050794,GO:0065007,GO:0097159,GO:0097367,GO:1901265,GO:1901363	PREDICTED: Citrus sinensis TMV resistance protein N-like (LOC102629661), transcript variant X2, mRNA	Yes	Yes
TR54866|c8_g1_i7	.	2.19444	.	0.00192751	GO:0000166,GO:0001882,GO:0001883,GO:0003674,GO:0005488,GO:0005515,GO:0007165,GO:0008150,GO:0017076,GO:0030554,GO:0032549,GO:0032550,GO:0032553,GO:0032555,GO:0032559,GO:0036094,GO:0043167,GO:0043168,GO:0043531,GO:0050789,GO:0050794,GO:0065007,GO:0097159,GO:0097367,GO:1901265,GO:1901363	PREDICTED: Citrus sinensis disease resistance protein RPP5-like (LOC102614733), mRNA
TR49186|c0_g1_i5	-2.73262	.	0.0026351	.	GO:0003674,GO:0005215,GO:0005216,GO:0005488,GO:0005509,GO:0005575,GO:0006810,GO:0006811,GO:0008150,GO:0009987,GO:0015075,GO:0015267,GO:0016020,GO:0022803,GO:0022838,GO:0022857,GO:0022891,GO:0022892,GO:0043167,GO:0043169,GO:0044699,GO:0044763,GO:0044765,GO:0046872,GO:0051179,GO:0051234,GO:0055085,GO:1902578	PREDICTED: Citrus sinensis two pore calcium channel protein 1 (LOC102609722), transcript variant X1, mRNA		Yes
TR49186|c0_g1_i11	.	-1.20334	.	0.000219954	GO:0003674,GO:0005215,GO:0005216,GO:0005488,GO:0005509,GO:0005575,GO:0006810,GO:0006811,GO:0008150,GO:0009987,GO:0015075,GO:0015267,GO:0016020,GO:0022803,GO:0022838,GO:0022857,GO:0022891,GO:0022892,GO:0043167,GO:0043169,GO:0044699,GO:0044763,GO:0044765,GO:0046872,GO:0051179,GO:0051234,GO:0055085,GO:1902578	PREDICTED: Citrus sinensis two pore calcium channel protein 1 (LOC102609722), transcript variant X1, mRNA		Yes
TR49186|c0_g1_i6	.	-1.03	.	0.0257912	GO:0003674,GO:0005215,GO:0005216,GO:0005575,GO:0006810,GO:0006811,GO:0008150,GO:0009987,GO:0015075,GO:0015267,GO:0016020,GO:0022803,GO:0022838,GO:0022857,GO:0022891,GO:0022892,GO:0044699,GO:0044763,GO:0044765,GO:0051179,GO:0051234,GO:0055085,GO:1902578	PREDICTED: Citrus sinensis two pore calcium channel protein 1 (LOC102609722), transcript variant X1, mRNA		Yes
TR53335|c0_g1_i16	-1.55568	.	0.0163022	.	GO:0003674,GO:0005215,GO:0005575,GO:0006810,GO:0008150,GO:0009987,GO:0016021,GO:0022857,GO:0031224,GO:0044425,GO:0044699,GO:0044763,GO:0044765,GO:0051179,GO:0051234,GO:0055085,GO:1902578	PREDICTED: Citrus sinensis hexose carrier protein HEX6-like (LOC102617727), transcript variant X1, mRNA		Yes
TR53335|c0_g1_i2	.	-1.47263	.	0.0330859	GO:0003674,GO:0005215,GO:0005575,GO:0006810,GO:0008150,GO:0009987,GO:0016021,GO:0022857,GO:0031224,GO:0044425,GO:0044699,GO:0044763,GO:0044765,GO:0051179,GO:0051234,GO:0055085,GO:1902578	PREDICTED: Citrus sinensis hexose carrier protein HEX6-like (LOC107178600), mRNA		Yes
TR40359|c0_g1_i6	2.47274	1.8018	3.8522e-08	0.000295267		PREDICTED: Citrus sinensis non-specific lipid-transfer protein 1-like (LOC102619568), mRNA		Yes
TR40359|c0_g1_i4	2.25324	1.48979	0.00011063	0.00425644		PREDICTED: Citrus sinensis non-specific lipid-transfer protein 1-like (LOC102619568), mRNA		Yes
TR40359|c0_g1_i3	1.94954	.	0.00215407	.		PREDICTED: Citrus sinensis non-specific lipid-transfer protein-like (LOC102619070), mRNA		Yes
TR40359|c0_g1_i2	2.0749	1.83647	0.0029581	0.0131679		PREDICTED: Citrus sinensis non-specific lipid-transfer protein 1-like (LOC102619568), mRNA		Yes
TR30963|c0_g1_i1	2.42984	2.17796	0.0138579	0.0377757		no hit
TR50760|c0_g2_i7	-2.47963	.	9.71058e-07	.	GO:0000160,GO:0007165,GO:0008150,GO:0035556,GO:0050789,GO:0050794,GO:0065007	PREDICTED: Citrus sinensis two-component response regulator-like APRR9 (LOC102622921), transcript variant X5, mRNA
TR50760|c0_g2_i4	-1.37011	-2.12743	4.72805e-06	0.000287923	GO:0000160,GO:0003674,GO:0005488,GO:0005515,GO:0007165,GO:0008150,GO:0035556,GO:0050789,GO:0050794,GO:0065007	PREDICTED: Citrus sinensis two-component response regulator-like APRR9 (LOC102622921), transcript variant X11, mRNA
TR50760|c0_g2_i3	-1.45102	-1.38968	0.0196599	0.00265335	GO:0000160,GO:0003674,GO:0005488,GO:0005515,GO:0007165,GO:0008150,GO:0035556,GO:0050789,GO:0050794,GO:0065007	PREDICTED: Citrus sinensis two-component response regulator-like APRR9 (LOC102622921), transcript variant X5, mRNA
TR50760|c0_g2_i8	.	-2.0676	.	0.000159895	GO:0000160,GO:0003674,GO:0005488,GO:0005515,GO:0007165,GO:0008150,GO:0035556,GO:0050789,GO:0050794,GO:0065007	PREDICTED: Citrus sinensis two-component response regulator-like APRR9 (LOC102622921), transcript variant X1, mRNA
TR52044|c3_g5_i4	-1.03307	.	0.000941046	.	GO:0003674,GO:0003824,GO:0004645,GO:0005975,GO:0008150,GO:0008152,GO:0008184,GO:0016740,GO:0016757,GO:0016758,GO:0044238,GO:0071704	PREDICTED: Citrus sinensis alpha-glucan phosphorylase 2, cytosolic (LOC102606996), transcript variant X5, mRNA
TR52044|c3_g5_i1	.	-1.47324	.	0.0499944	GO:0003674,GO:0003824,GO:0004645,GO:0005975,GO:0008150,GO:0008152,GO:0008184,GO:0016740,GO:0016757,GO:0016758,GO:0044238,GO:0071704	PREDICTED: Citrus sinensis alpha-glucan phosphorylase 2, cytosolic (LOC102606996), transcript variant X5, mRNA
TR53981|c0_g1_i10	1.55165	.	0.0245587	.	GO:0001522,GO:0003674,GO:0003676,GO:0003723,GO:0003824,GO:0005488,GO:0006139,GO:0006725,GO:0006807,GO:0008150,GO:0008152,GO:0009451,GO:0009982,GO:0009987,GO:0016070,GO:0016853,GO:0016866,GO:0034641,GO:0043170,GO:0043412,GO:0044237,GO:0044238,GO:0044260,GO:0046483,GO:0071704,GO:0090304,GO:0097159,GO:1901360,GO:1901363	PREDICTED: Citrus sinensis multisubstrate pseudouridine synthase 7 (LOC102614609), transcript variant X1, mRNA
TR53981|c0_g1_i8	.	2.11543	.	0.0468019	GO:0001522,GO:0003674,GO:0003676,GO:0003723,GO:0003824,GO:0005488,GO:0006139,GO:0006725,GO:0006807,GO:0008150,GO:0008152,GO:0009451,GO:0009982,GO:0009987,GO:0016070,GO:0016853,GO:0016866,GO:0034641,GO:0043170,GO:0043412,GO:0044237,GO:0044238,GO:0044260,GO:0046483,GO:0071704,GO:0090304,GO:0097159,GO:1901360,GO:1901363	PREDICTED: Citrus sinensis multisubstrate pseudouridine synthase 7 (LOC102614609), transcript variant X3, mRNA
TR35865|c0_g1_i1	1.46072	1.9644	0.0413852	0.00122288		Citrus clementina hypothetical protein (CICLE_v10030487mg) mRNA, complete cds
TR52757|c1_g1_i9	3.07516	2.79398	7.80742e-05	0.00111949	GO:0001871,GO:0003674,GO:0005488,GO:0005509,GO:0030246,GO:0030247,GO:0043167,GO:0043169,GO:0046872	Citrus clementina hypothetical protein (CICLE_v10004442mg) mRNA, complete cds		Yes
TR52757|c1_g1_i3	2.89138	.	0.00033368	.	GO:0001871,GO:0003674,GO:0005488,GO:0005509,GO:0030246,GO:0030247,GO:0043167,GO:0043169,GO:0046872	PREDICTED: Citrus sinensis wall-associated receptor kinase 2-like (LOC102607632), mRNA		Yes
TR52757|c1_g1_i10	.	5.51103	.	1.1824e-19	GO:0000166,GO:0001871,GO:0001882,GO:0001883,GO:0003674,GO:0003824,GO:0004672,GO:0005488,GO:0005509,GO:0005524,GO:0006464,GO:0006468,GO:0006793,GO:0006796,GO:0008150,GO:0008152,GO:0009987,GO:0016301,GO:0016310,GO:0016740,GO:0016772,GO:0016773,GO:0017076,GO:0019538,GO:0030246,GO:0030247,GO:0030554,GO:0032549,GO:0032550,GO:0032553,GO:0032555,GO:0032559,GO:0035639,GO:0036094,GO:0036211,GO:0043167,GO:…	PREDICTED: Citrus sinensis wall-associated receptor kinase 2-like (LOC102607632), mRNA		Yes
TR52757|c1_g1_i5	.	5.03988	.	1.17884e-14	GO:0000166,GO:0001871,GO:0001882,GO:0001883,GO:0003674,GO:0003824,GO:0004672,GO:0005488,GO:0005509,GO:0005524,GO:0006464,GO:0006468,GO:0006793,GO:0006796,GO:0008150,GO:0008152,GO:0009987,GO:0016301,GO:0016310,GO:0016740,GO:0016772,GO:0016773,GO:0017076,GO:0019538,GO:0030246,GO:0030247,GO:0030554,GO:0032549,GO:0032550,GO:0032553,GO:0032555,GO:0032559,GO:0035639,GO:0036094,GO:0036211,GO:0043167,GO:…	PREDICTED: Citrus sinensis wall-associated receptor kinase 2-like (LOC102607632), mRNA		Yes
TR52757|c1_g1_i7	.	4.59212	.	2.05275e-12	GO:0000166,GO:0001871,GO:0001882,GO:0001883,GO:0003674,GO:0003824,GO:0004672,GO:0005488,GO:0005509,GO:0005524,GO:0006464,GO:0006468,GO:0006793,GO:0006796,GO:0008150,GO:0008152,GO:0009987,GO:0016301,GO:0016310,GO:0016740,GO:0016772,GO:0016773,GO:0017076,GO:0019538,GO:0030246,GO:0030247,GO:0030554,GO:0032549,GO:0032550,GO:0032553,GO:0032555,GO:0032559,GO:0035639,GO:0036094,GO:0036211,GO:0043167,GO:…	PREDICTED: Citrus sinensis wall-associated receptor kinase 2-like (LOC102607632), mRNA		Yes
TR52757|c1_g1_i11	.	4.28031	.	3.07856e-09	GO:0001871,GO:0003674,GO:0005488,GO:0005509,GO:0030246,GO:0030247,GO:0043167,GO:0043169,GO:0046872	Citrus clementina hypothetical protein (CICLE_v10004442mg) mRNA, complete cds
TR52757|c1_g1_i1	.	1.26794	.	0.0418044	GO:0000166,GO:0001871,GO:0001882,GO:0001883,GO:0003674,GO:0003824,GO:0004672,GO:0005488,GO:0005509,GO:0005524,GO:0006464,GO:0006468,GO:0006793,GO:0006796,GO:0008150,GO:0008152,GO:0009987,GO:0016301,GO:0016310,GO:0016740,GO:0016772,GO:0016773,GO:0017076,GO:0019538,GO:0030246,GO:0030247,GO:0030554,GO:0032549,GO:0032550,GO:0032553,GO:0032555,GO:0032559,GO:0035639,GO:0036094,GO:0036211,GO:0043167,GO:…	PREDICTED: Citrus sinensis wall-associated receptor kinase 2-like (LOC102607335), mRNA		Yes
TR49150|c0_g1_i2	-1.82458	-1.30521	0.00444609	0.000184004	GO:0000287,GO:0003674,GO:0003824,GO:0005488,GO:0008150,GO:0008152,GO:0010333,GO:0016829,GO:0016835,GO:0016838,GO:0043167,GO:0043169,GO:0046872	PREDICTED: Citrus sinensis (-)-germacrene D synthase-like (LOC102610978), transcript variant X1, mRNA
TR48741|c0_g3_i1	1.95381	1.83142	0.00355654	0.0432771		PREDICTED: Citrus sinensis probable polygalacturonase (LOC102616450), mRNA
TR50743|c0_g1_i1	-1.76813	-1.90699	9.50554e-06	7.58625e-08	GO:0000160,GO:0007165,GO:0008150,GO:0035556,GO:0050789,GO:0050794,GO:0065007	PREDICTED: Citrus sinensis two-component response regulator-like APRR5 (LOC102631246), transcript variant X2, mRNA
TR50743|c0_g1_i3	-1.09689	-1.51211	0.00129295	1.77746e-07	GO:0000160,GO:0007165,GO:0008150,GO:0035556,GO:0050789,GO:0050794,GO:0065007	PREDICTED: Citrus sinensis two-component response regulator-like APRR5 (LOC102631246), transcript variant X3, mRNA
TR50743|c0_g1_i2	-1.17735	-1.55097	0.0199921	0.0386926	GO:0000160,GO:0007165,GO:0008150,GO:0035556,GO:0050789,GO:0050794,GO:0065007	PREDICTED: Citrus sinensis two-component response regulator-like APRR5 (LOC102631246), transcript variant X2, mRNA
TR50743|c0_g1_i4	-1.03737	-1.37973	0.0208126	5.57081e-06	GO:0000160,GO:0007165,GO:0008150,GO:0035556,GO:0050789,GO:0050794,GO:0065007	PREDICTED: Citrus sinensis two-component response regulator-like APRR5 (LOC102631246), transcript variant X2, mRNA
TR51758|c0_g2_i5	-2.36786	.	0.0163527	.		Citrus clementina hypothetical protein (CICLE_v10031573mg) mRNA, complete cds
TR51758|c0_g2_i6	.	2.13158	.	0.0390948		Citrus clementina hypothetical protein (CICLE_v10031573mg) mRNA, complete cds
TR48085|c0_g1_i1	1.37942	1.83702	0.00369002	0.00107328		Citrus clementina hypothetical protein (CICLE_v10030487mg) mRNA, complete cds
TR37516|c1_g1_i1	-1.98241	-1.79368	0.00466468	0.0330543		Citrus unshiu CitINV1 mRNA for acid invertase, complete cds
TR54433|c0_g1_i8	-1.15461	.	0.0019831	.	GO:0000166,GO:0001882,GO:0001883,GO:0003674,GO:0003824,GO:0005488,GO:0005524,GO:0005575,GO:0016020,GO:0016462,GO:0016787,GO:0016817,GO:0016818,GO:0016887,GO:0017076,GO:0017111,GO:0030554,GO:0032549,GO:0032550,GO:0032553,GO:0032555,GO:0032559,GO:0035639,GO:0036094,GO:0043167,GO:0043168,GO:0097159,GO:0097367,GO:1901265,GO:1901363	PREDICTED: Citrus sinensis ABC transporter G family member 32 (LOC102631050), mRNA		Yes
TR54433|c0_g1_i10	.	-1.81637	.	2.54229e-08	GO:0000166,GO:0001882,GO:0001883,GO:0003674,GO:0003824,GO:0005488,GO:0005524,GO:0005575,GO:0016020,GO:0016462,GO:0016787,GO:0016817,GO:0016818,GO:0016887,GO:0017076,GO:0017111,GO:0030554,GO:0032549,GO:0032550,GO:0032553,GO:0032555,GO:0032559,GO:0035639,GO:0036094,GO:0043167,GO:0043168,GO:0097159,GO:0097367,GO:1901265,GO:1901363	Citrus clementina hypothetical protein (CICLE_v10007249mg) mRNA, complete cds		Yes
TR36476|c0_g1_i1	-1.26184	-1.83441	0.0199906	0.00203707	GO:0000166,GO:0001882,GO:0001883,GO:0003674,GO:0003824,GO:0004672,GO:0005488,GO:0005515,GO:0005524,GO:0006464,GO:0006468,GO:0006793,GO:0006796,GO:0008150,GO:0008152,GO:0009987,GO:0016301,GO:0016310,GO:0016740,GO:0016772,GO:0016773,GO:0017076,GO:0019538,GO:0030554,GO:0032549,GO:0032550,GO:0032553,GO:0032555,GO:0032559,GO:0035639,GO:0036094,GO:0036211,GO:0043167,GO:0043168,GO:0043170,GO:0043412,GO:…	PREDICTED: Citrus sinensis putative receptor-like protein kinase At3g47110 (LOC102613917), mRNA		Yes
TR51081|c0_g2_i7	-3.08372	.	0.000214033	.		PREDICTED: Citrus sinensis telomere repeat-binding protein 4 (LOC102622190), transcript variant X2, mRNA
TR51081|c0_g2_i4	.	3.94768	.	3.78339e-08		PREDICTED: Citrus sinensis telomere repeat-binding protein 4 (LOC102622190), transcript variant X3, mRNA
TR51258|c0_g1_i4	3.39513	.	2.04006e-05	.		Citrus clementina hypothetical protein (CICLE_v10004518mg) mRNA, complete cds	Yes	Yes
TR51258|c0_g1_i6	2.84352	.	0.00058592	.		Citrus clementina hypothetical protein (CICLE_v10004518mg) mRNA, complete cds
TR51258|c0_g1_i3	2.30509	.	0.0130099	.	GO:0003674,GO:0005488,GO:0005515	PREDICTED: Citrus sinensis ankyrin repeat-containing protein At3g12360-like (LOC107178435), mRNA		Yes
TR51258|c0_g1_i5	.	4.21502	.	8.91451e-10		Citrus clementina hypothetical protein (CICLE_v10004518mg) mRNA, complete cds
TR51258|c0_g1_i8	.	3.43799	.	1.10699e-06	GO:0003674,GO:0005488,GO:0005515	Citrus clementina hypothetical protein (CICLE_v10004518mg) mRNA, complete cds
TR51258|c0_g1_i7	.	2.49031	.	0.00341078		Citrus clementina hypothetical protein (CICLE_v10004518mg) mRNA, complete cds
TR46734|c2_g2_i1	1.56984	1.7171	0.00386496	6.51378e-05		Citrus clementina hypothetical protein (CICLE_v10029326mg) mRNA, complete cds
TR35009|c0_g1_i1	1.24581	.	0.00298771	.		Citrus clementina hypothetical protein (CICLE_v10033013mg) mRNA, complete cds
TR35009|c0_g1_i2	.	1.38419	.	0.049614		Citrus clementina hypothetical protein (CICLE_v10033013mg) mRNA, complete cds
TR52050|c1_g1_i2	1.41546	2.0843	0.0069967	0.000174212		PREDICTED: Citrus sinensis uncharacterized LOC102627314 (LOC102627314), ncRNA
TR52050|c1_g5_i2	1.3481	1.59252	0.000336108	0.000787362		PREDICTED: Citrus sinensis uncharacterized LOC102627314 (LOC102627314), ncRNA
TR52050|c1_g5_i3	2.99539	1.3351	0.000491844	0.0172662		PREDICTED: Citrus sinensis uncharacterized LOC107175941 (LOC107175941), ncRNA
TR52050|c1_g5_i4	.	2.16282	.	0.0365758		PREDICTED: Citrus sinensis uncharacterized LOC107175941 (LOC107175941), ncRNA
TR35462|c0_g1_i2	-2.37829	-2.29621	0.000971383	0.0181608	GO:0005575,GO:0016020,GO:0016021,GO:0031224,GO:0044425	PREDICTED: Citrus sinensis WAT1-related protein At5g64700-like (LOC102608786), mRNA		Yes
TR53220|c1_g1_i5	2.45133	2.50201	0.0091242	0.0021522	GO:0003674,GO:0005488,GO:0005515	Citrus clementina hypothetical protein (CICLE_v10014410mg) mRNA, complete cds	Yes	Yes
TR53220|c1_g1_i4	.	2.58652	.	3.16136e-07	GO:0003674,GO:0005488,GO:0005515	PREDICTED: Citrus sinensis probable leucine-rich repeat receptor-like protein kinase At1g35710 (LOC107174684), mRNA		Yes
TR53220|c1_g1_i3	.	2.26184	.	4.81361e-07	GO:0003674,GO:0005488,GO:0005515	PREDICTED: Citrus sinensis probable leucine-rich repeat receptor-like protein kinase At1g35710 (LOC107174684), mRNA		Yes
TR54249|c2_g2_i5	1.49843	1.52903	0.00833059	0.00299769	GO:0003674,GO:0003824,GO:0003993,GO:0005488,GO:0016787,GO:0016788,GO:0016791,GO:0042578,GO:0043167,GO:0043169,GO:0046872	PREDICTED: Citrus sinensis purple acid phosphatase 2-like (LOC102621426), mRNA
TR45939|c0_g1_i1	-1.57725	.	0.0131748	.		PREDICTED: Citrus sinensis enolase-phosphatase E1-like (LOC102615831), mRNA
TR45939|c0_g1_i2	.	-1.60326	.	0.00920522		PREDICTED: Citrus sinensis enolase-phosphatase E1-like (LOC102615831), mRNA
TR33498|c1_g1_i1	2.02712	1.95506	0.0095464	0.0140575		PREDICTED: Citrus sinensis putative receptor-like protein kinase At3g47110 (LOC102620588), mRNA		Yes
TR29198|c0_g1_i1	1.85729	2.29378	0.0490428	5.47502e-08		PREDICTED: Citrus sinensis EG45-like domain containing protein (LOC102615924), mRNA
TR53314|c0_g1_i1	-2.00305	-2.1841	1.62712e-05	1.64665e-09		PREDICTED: Citrus sinensis protein LHY-like (LOC102627326), transcript variant X1, mRNA
TR53314|c0_g1_i4	-2.00985	-1.84871	0.00570757	0.00464574		Citrus clementina hypothetical protein (CICLE_v10018964mg) mRNA, complete cds
TR51851|c0_g2_i10	-2.5951	.	0.00567539	.		PREDICTED: Citrus sinensis uncharacterized LOC102607314 (LOC102607314), transcript variant X2, ncRNA
TR51851|c0_g2_i5	.	-2.03024	.	0.00423649		PREDICTED: Citrus sinensis uncharacterized LOC102607314 (LOC102607314), transcript variant X2, ncRNA
TR52145|c1_g2_i2	-1.39887	-2.07158	0.00381544	2.95324e-18	GO:0003674,GO:0003824,GO:0005488,GO:0005506,GO:0008150,GO:0008152,GO:0016491,GO:0016705,GO:0020037,GO:0043167,GO:0043169,GO:0044699,GO:0044710,GO:0046872,GO:0046906,GO:0046914,GO:0055114,GO:0097159,GO:1901363	PREDICTED: Citrus sinensis cytochrome P450 CYP72A219-like (LOC102608813), mRNA		Yes
TR52145|c1_g2_i1	-1.12829	-1.41936	0.0138916	1.00433e-06	GO:0003674,GO:0003824,GO:0005488,GO:0005506,GO:0008150,GO:0008152,GO:0016491,GO:0016705,GO:0020037,GO:0043167,GO:0043169,GO:0044699,GO:0044710,GO:0046872,GO:0046906,GO:0046914,GO:0055114,GO:0097159,GO:1901363	PREDICTED: Citrus sinensis cytochrome P450 CYP72A219-like (LOC102609658), mRNA		Yes
TR47742|c0_g1_i9	-1.17797	-1.55948	0.0153646	0.0183228		Citrus clementina hypothetical protein (CICLE_v10020687mg) mRNA, complete cds
TR64949|c0_g1_i1	1.45651	1.39361	0.000128086	0.0246873	GO:0003674,GO:0003824,GO:0008150,GO:0008152,GO:0016491,GO:0044699,GO:0044710,GO:0055114	PREDICTED: Citrus sinensis 1-aminocyclopropane-1-carboxylate oxidase (LOC102611528), mRNA		Yes
TR33584|c0_g1_i1	-2.20261	-2.43988	0.0184483	0.00723697		PREDICTED: Citrus sinensis uncharacterized LOC102615761 (LOC102615761), mRNA
TR41412|c0_g5_i1	2.34438	2.41802	0.00616514	0.00691446	GO:0003674,GO:0003824,GO:0004672,GO:0006464,GO:0006468,GO:0006793,GO:0006796,GO:0008150,GO:0008152,GO:0009987,GO:0016301,GO:0016310,GO:0016740,GO:0016772,GO:0016773,GO:0019538,GO:0036211,GO:0043170,GO:0043412,GO:0044237,GO:0044238,GO:0044260,GO:0044267,GO:0071704	PREDICTED: Citrus sinensis putative receptor-like protein kinase At3g47110 (LOC102620588), mRNA		Yes
TR41020|c0_g1_i2	1.77416	1.55355	1.04519e-07	0.00879667		PREDICTED: Citrus sinensis LOB domain-containing protein 38 (LOC102609800), mRNA
TR48235|c0_g1_i3	2.23642	.	0.0364219	.	GO:0003674,GO:0003824	PREDICTED: Citrus sinensis protein phosphatase 2C 29 (LOC102615163), mRNA		Yes
TR48235|c0_g1_i4	.	-2.96429	.	0.000602706	GO:0003674,GO:0003824	PREDICTED: Citrus sinensis protein phosphatase 2C 29 (LOC102615163), mRNA		Yes
TR49459|c0_g2_i10	-1.23429	.	0.0405346	.		PREDICTED: Citrus sinensis hypothetical protein (LOC102613695), transcript variant X2, mRNA
TR49459|c0_g2_i3	.	-1.19958	.	0.00879667		Citrus clementina hypothetical protein (CICLE_v10030362mg) mRNA, complete cds
TR10909|c0_g1_i1	2.12791	2.1157	0.0029581	0.0391286	GO:0001071,GO:0003674,GO:0003676,GO:0003677,GO:0003700,GO:0005488,GO:0006355,GO:0008150,GO:0009889,GO:0010468,GO:0010556,GO:0019219,GO:0019222,GO:0031323,GO:0031326,GO:0043565,GO:0050789,GO:0050794,GO:0051171,GO:0051252,GO:0060255,GO:0065007,GO:0080090,GO:0097159,GO:1901363,GO:1903506,GO:2000112,GO:2001141	PREDICTED: Citrus sinensis basic leucine zipper 43 (LOC102609679), mRNA
TR41858|c0_g1_i1	2.04519	1.32201	3.55868e-13	0.00507616		Citrus clementina hypothetical protein (CICLE_v100013711mg) mRNA, partial cds
TR41858|c0_g1_i4	2.03667	1.22211	1.04815e-07	0.00310848	GO:0003674,GO:0003824,GO:0016787	PREDICTED: Citrus sinensis hypothetical protein (LOC102628021), mRNA
TR41858|c0_g1_i2	1.66755	1.07958	9.61045e-05	0.00553039	GO:0003674,GO:0003824,GO:0016787	PREDICTED: Citrus sinensis hypothetical protein (LOC102628021), mRNA
TR41858|c0_g1_i3	1.64719	1.70858	0.0039773	0.000123657	GO:0003674,GO:0003824,GO:0016787	PREDICTED: Citrus sinensis hypothetical protein (LOC102628021), mRNA
TR44964|c0_g3_i14	-2.19517	.	0.0437423	.		PREDICTED: Citrus sinensis uncharacterized LOC102617011 (LOC102617011), transcript variant X1, mRNA
TR44964|c0_g3_i4	.	-2.38488	.	0.0158546		Citrus clementina hypothetical protein (CICLE_v10028256mg) mRNA, complete cds
TR49183|c0_g2_i6	3.03686	.	0.000214033	.	GO:0003674,GO:0003824,GO:0005488,GO:0005506,GO:0005575,GO:0005737,GO:0005975,GO:0006020,GO:0006066,GO:0008150,GO:0008152,GO:0009056,GO:0009987,GO:0016052,GO:0016491,GO:0016701,GO:0019310,GO:0019751,GO:0043167,GO:0043169,GO:0044237,GO:0044238,GO:0044248,GO:0044262,GO:0044275,GO:0044281,GO:0044282,GO:0044424,GO:0044464,GO:0044699,GO:0044710,GO:0044712,GO:0044723,GO:0044724,GO:0044763,GO:0046164,GO:…	Citrus clementina hypothetical protein (CICLE_v10005543mg) mRNA, complete cds
TR49183|c0_g2_i1	2.03142	.	0.00405686	.	GO:0003674,GO:0003824,GO:0005488,GO:0005506,GO:0005575,GO:0005737,GO:0005975,GO:0006020,GO:0006066,GO:0008150,GO:0008152,GO:0009056,GO:0009987,GO:0016052,GO:0016491,GO:0016701,GO:0019310,GO:0019751,GO:0043167,GO:0043169,GO:0044237,GO:0044238,GO:0044248,GO:0044262,GO:0044275,GO:0044281,GO:0044282,GO:0044424,GO:0044464,GO:0044699,GO:0044710,GO:0044712,GO:0044723,GO:0044724,GO:0044763,GO:0046164,GO:…	PREDICTED: Citrus sinensis inositol oxygenase 1-like (LOC102618589), mRNA
TR49183|c0_g2_i2	.	2.98563	.	0.000457213	GO:0003674,GO:0003824,GO:0005488,GO:0005506,GO:0005575,GO:0005737,GO:0005975,GO:0006020,GO:0006066,GO:0008150,GO:0008152,GO:0009056,GO:0009987,GO:0016052,GO:0016491,GO:0016701,GO:0019310,GO:0019751,GO:0043167,GO:0043169,GO:0044237,GO:0044238,GO:0044248,GO:0044262,GO:0044275,GO:0044281,GO:0044282,GO:0044424,GO:0044464,GO:0044699,GO:0044710,GO:0044712,GO:0044723,GO:0044724,GO:0044763,GO:0046164,GO:…	Citrus clementina hypothetical protein (CICLE_v10005543mg) mRNA, complete cds
TR49183|c0_g2_i8	.	1.97639	.	0.0406373	GO:0003674,GO:0003824,GO:0005488,GO:0005506,GO:0005575,GO:0005737,GO:0005975,GO:0006020,GO:0006066,GO:0008150,GO:0008152,GO:0009056,GO:0009987,GO:0016052,GO:0016491,GO:0016701,GO:0019310,GO:0019751,GO:0043167,GO:0043169,GO:0044237,GO:0044238,GO:0044248,GO:0044262,GO:0044275,GO:0044281,GO:0044282,GO:0044424,GO:0044464,GO:0044699,GO:0044710,GO:0044712,GO:0044723,GO:0044724,GO:0044763,GO:0046164,GO:…	Citrus clementina hypothetical protein (CICLE_v10005543mg) mRNA, complete cds
TR47816|c0_g1_i2	2.1042	1.7627	0.00213921	0.00167252	GO:0000166,GO:0001882,GO:0001883,GO:0003674,GO:0003824,GO:0004672,GO:0005488,GO:0005524,GO:0006464,GO:0006468,GO:0006793,GO:0006796,GO:0008037,GO:0008150,GO:0008152,GO:0009987,GO:0016301,GO:0016310,GO:0016740,GO:0016772,GO:0016773,GO:0017076,GO:0019538,GO:0030554,GO:0032549,GO:0032550,GO:0032553,GO:0032555,GO:0032559,GO:0035639,GO:0036094,GO:0036211,GO:0043167,GO:0043168,GO:0043170,GO:0043412,GO:…	PREDICTED: Citrus sinensis G-type lectin S-receptor-like serine/threonine-protein kinase RLK1 (LOC102625558), mRNA		Yes
TR47496|c1_g1_i1	2.93073	2.96356	0.000167803	1.33555e-06	GO:0000166,GO:0001882,GO:0001883,GO:0003674,GO:0003824,GO:0004672,GO:0005488,GO:0005524,GO:0006464,GO:0006468,GO:0006793,GO:0006796,GO:0008150,GO:0008152,GO:0009987,GO:0016301,GO:0016310,GO:0016740,GO:0016772,GO:0016773,GO:0017076,GO:0019538,GO:0030554,GO:0032549,GO:0032550,GO:0032553,GO:0032555,GO:0032559,GO:0035639,GO:0036094,GO:0036211,GO:0043167,GO:0043168,GO:0043170,GO:0043412,GO:0044237,GO:…	PREDICTED: Citrus sinensis wall-associated receptor kinase-like 10 (LOC102630580), transcript variant X2, mRNA	Yes	Yes
TR38276|c0_g1_i1	-1.94766	-2.62801	0.00394362	1.46333e-14	GO:0003674,GO:0003824,GO:0016740,GO:0016757	PREDICTED: Citrus sinensis galactinol synthase 2-like (LOC102608882), mRNA
TR51156|c1_g1_i1	-1.25384	-1.11581	0.000420826	6.95999e-05	GO:0000166,GO:0003674,GO:0005488,GO:0008150,GO:0008152,GO:0036094,GO:0044699,GO:0044710,GO:0048037,GO:0050662,GO:0051287,GO:0055114,GO:0097159,GO:1901265,GO:1901363	PREDICTED: Citrus sinensis 8-hydroxygeraniol dehydrogenase-like (LOC102620949), mRNA
TR28527|c0_g1_i1	-1.51114	-1.3412	3.01951e-05	0.0204846	GO:0003674,GO:0005215,GO:0005575,GO:0006810,GO:0006811,GO:0006812,GO:0006814,GO:0008150,GO:0009987,GO:0015672,GO:0016020,GO:0016021,GO:0030001,GO:0031224,GO:0044425,GO:0044699,GO:0044763,GO:0044765,GO:0051179,GO:0051234,GO:0055085,GO:1902578	Citrus clementina hypothetical protein (CICLE_v10014770mg) mRNA, complete cds		Yes
TR54761|c2_g1_i1	1.62244	.	0.024442	.		PREDICTED: Citrus sinensis uncharacterized LOC102620441 (LOC102620441), mRNA	Yes	Yes
TR54761|c2_g1_i2	1.56215	1.93653	0.0387431	0.00174935		PREDICTED: Citrus sinensis TMV resistance protein N-like (LOC102619214), transcript variant X5, mRNA		Yes
TR47856|c0_g1_i11	2.70287	2.23663	0.00268354	0.0161747	GO:0001871,GO:0003674,GO:0005488,GO:0030246,GO:0030247	PREDICTED: Citrus sinensis wall-associated receptor kinase-like 10 (LOC102630580), transcript variant X2, mRNA	Yes	Yes
TR47856|c0_g1_i14	2.20667	3.17432	0.038119	8.12461e-06	GO:0001871,GO:0003674,GO:0005488,GO:0030246,GO:0030247	PREDICTED: Citrus sinensis wall-associated receptor kinase-like 10 (LOC102630580), transcript variant X2, mRNA		Yes
TR47856|c0_g1_i4	.	3.01652	.	0.000254664	GO:0001871,GO:0003674,GO:0005488,GO:0030246,GO:0030247	PREDICTED: Citrus sinensis wall-associated receptor kinase-like 10 (LOC102630580), transcript variant X2, mRNA		Yes
TR47856|c0_g1_i8	.	2.42721	.	0.00195359	GO:0001871,GO:0003674,GO:0005488,GO:0030246,GO:0030247	PREDICTED: Citrus sinensis wall-associated receptor kinase-like 10 (LOC102630580), transcript variant X2, mRNA		Yes
TR47856|c0_g1_i9	.	2.05163	.	0.0276768	GO:0001871,GO:0003674,GO:0005488,GO:0030246,GO:0030247	Citrus clementina hypothetical protein (CICLE_v10025047mg) mRNA, complete cds
TR47001|c1_g1_i13	3.81926	.	3.66072e-07	.		Citrus clementina hypothetical protein (CICLE_v10014085mg) mRNA, complete cds		Yes
TR47001|c1_g1_i11	3.42867	-2.65476	1.40801e-05	0.00403283		PREDICTED: Citrus sinensis type II inositol polyphosphate 5-phosphatase 15 (LOC102624548), transcript variant X1, mRNA		Yes
TR50399|c0_g2_i6	-1.88887	-2.64456	0.0118624	0.000466893		PREDICTED: Citrus sinensis ultraviolet-B receptor UVR8 (LOC102606597), transcript variant X4, mRNA
TR50795|c0_g2_i6	-2.71764	.	0.00298771	.	GO:0000166,GO:0001882,GO:0001883,GO:0003674,GO:0003824,GO:0005215,GO:0005488,GO:0005524,GO:0005575,GO:0006810,GO:0008150,GO:0009987,GO:0015399,GO:0015405,GO:0016021,GO:0016462,GO:0016787,GO:0016817,GO:0016818,GO:0016820,GO:0016887,GO:0017076,GO:0017111,GO:0022804,GO:0022857,GO:0030554,GO:0031224,GO:0032549,GO:0032550,GO:0032553,GO:0032555,GO:0032559,GO:0035639,GO:0036094,GO:0042623,GO:0042626,GO:…	PREDICTED: Citrus sinensis putative ABC transporter B family member 8 (LOC102607835), mRNA		Yes
TR50795|c0_g2_i5	.	-3.36063	.	3.59071e-05	GO:0000166,GO:0001882,GO:0001883,GO:0003674,GO:0003824,GO:0005215,GO:0005488,GO:0005524,GO:0005575,GO:0006810,GO:0008150,GO:0009987,GO:0015399,GO:0015405,GO:0016021,GO:0016462,GO:0016787,GO:0016817,GO:0016818,GO:0016820,GO:0016887,GO:0017076,GO:0017111,GO:0022804,GO:0022857,GO:0030554,GO:0031224,GO:0032549,GO:0032550,GO:0032553,GO:0032555,GO:0032559,GO:0035639,GO:0036094,GO:0042623,GO:0042626,GO:…	PREDICTED: Citrus sinensis putative ABC transporter B family member 8 (LOC102607835), mRNA		Yes
TR50795|c0_g2_i2	.	-1.94003	.	0.000789297	GO:0000166,GO:0001882,GO:0001883,GO:0003674,GO:0003824,GO:0005215,GO:0005488,GO:0005524,GO:0005575,GO:0006810,GO:0008150,GO:0009987,GO:0015399,GO:0015405,GO:0016021,GO:0016462,GO:0016787,GO:0016817,GO:0016818,GO:0016820,GO:0016887,GO:0017076,GO:0017111,GO:0022804,GO:0022857,GO:0030554,GO:0031224,GO:0032549,GO:0032550,GO:0032553,GO:0032555,GO:0032559,GO:0035639,GO:0036094,GO:0042623,GO:0042626,GO:…	PREDICTED: Citrus sinensis putative ABC transporter B family member 8 (LOC102607835), mRNA		Yes
TR30388|c0_g1_i1	1.3358	1.52357	0.00565016	0.00146336		Citrus clementina hypothetical protein (CICLE_v10013129mg) mRNA, complete cds
TR53096|c0_g1_i1	-1.78385	-1.58683	1.89753e-05	7.87687e-05	GO:0003674,GO:0003824,GO:0004497,GO:0005488,GO:0008150,GO:0008152,GO:0010277,GO:0016491,GO:0016701,GO:0016703,GO:0044699,GO:0044710,GO:0051536,GO:0051537,GO:0051540,GO:0055114	PREDICTED: Citrus sinensis protochlorophyllide-dependent translocon component 52, chloroplastic (LOC102615553), mRNA		Yes	Yes
TR53096|c0_g1_i5	.	1.41281	.	0.00295274	GO:0003674,GO:0003824,GO:0004497,GO:0005488,GO:0008150,GO:0008152,GO:0010277,GO:0016491,GO:0016701,GO:0016703,GO:0044699,GO:0044710,GO:0051536,GO:0051537,GO:0051540,GO:0055114	PREDICTED: Citrus sinensis protochlorophyllide-dependent translocon component 52, chloroplastic-like (LOC102615272), mRNA		Yes	Yes
TR47082|c0_g1_i2	-1.57332	-1.33187	0.0012401	0.0423238		PREDICTED: Citrus sinensis uncharacterized LOC102613307 (LOC102613307), mRNA
TR47082|c0_g1_i1	-1.2887	.	0.00253814	.		PREDICTED: Citrus sinensis uncharacterized LOC102613307 (LOC102613307), mRNA
TR45458|c0_g1_i3	2.4873	.	0.00947582	.	GO:0001071,GO:0003674,GO:0003676,GO:0003677,GO:0003700,GO:0005488,GO:0006355,GO:0008150,GO:0009889,GO:0010468,GO:0010556,GO:0019219,GO:0019222,GO:0031323,GO:0031326,GO:0043565,GO:0050789,GO:0050794,GO:0051171,GO:0051252,GO:0060255,GO:0065007,GO:0080090,GO:0097159,GO:1901363,GO:1903506,GO:2000112,GO:2001141	Citrus japonica WRKY40 (WRKY40) mRNA, complete cds	Yes
TR45458|c0_g1_i4	.	2.6341	.	0.00173537	GO:0001071,GO:0003674,GO:0003676,GO:0003677,GO:0003700,GO:0005488,GO:0006355,GO:0008150,GO:0009889,GO:0010468,GO:0010556,GO:0019219,GO:0019222,GO:0031323,GO:0031326,GO:0043565,GO:0050789,GO:0050794,GO:0051171,GO:0051252,GO:0060255,GO:0065007,GO:0080090,GO:0097159,GO:1901363,GO:1903506,GO:2000112,GO:2001141	PREDICTED: Citrus sinensis probable WRKY transcription factor 40 (LOC102627570), mRNA
TR27276|c0_g1_i3	3.03843	4.5545	0.00034547	2.97818e-11		PREDICTED: Citrus sinensis probable cyclic nucleotide-gated ion channel 3 (LOC102626259), transcript variant X2, mRNA		Yes
TR27276|c0_g1_i2	.	3.61143	.	3.65152e-06		PREDICTED: Citrus sinensis probable cyclic nucleotide-gated ion channel 3 (LOC102626259), transcript variant X2, mRNA		Yes
TR27792|c0_g3_i1	1.58838	1.97914	0.0131907	0.00250062		PREDICTED: Citrus sinensis LOB domain-containing protein 25 (LOC102622027), transcript variant X1, mRNA
TR51756|c3_g2_i4	1.71643	1.59354	0.00386496	0.000160995	GO:0005575,GO:0006810,GO:0008150,GO:0009987,GO:0016020,GO:0044699,GO:0044763,GO:0044765,GO:0051179,GO:0051234,GO:0055085,GO:1902578	PREDICTED: Citrus sinensis mechanosensitive ion channel protein 10-like (LOC102617883), transcript variant X1, mRNA		Yes
TR51756|c3_g2_i5	.	1.6666	.	0.0106822	GO:0005575,GO:0006810,GO:0008150,GO:0009987,GO:0016020,GO:0044699,GO:0044763,GO:0044765,GO:0051179,GO:0051234,GO:0055085,GO:1902578	Citrus clementina hypothetical protein (CICLE_v10025168mg) mRNA, complete cds		Yes
TR51756|c3_g2_i1	.	1.51276	.	0.0176338		Citrus clementina hypothetical protein (CICLE_v10025168mg) mRNA, complete cds		Yes
TR52975|c0_g1_i5	1.61196	1.28827	0.00076034	0.0289984	GO:0003674,GO:0003824,GO:0008150,GO:0008152,GO:0016740,GO:0016757,GO:0016758	PREDICTED: Citrus sinensis UDP-glucose iridoid glucosyltransferase-like (LOC102620311), transcript variant X2, mRNA
TR50384|c0_g1_i5	-3.48374	-1.49916	1.37339e-07	0.00510571	GO:0003674,GO:0003824,GO:0016787	PREDICTED: Citrus sinensis nudix hydrolase 8 (LOC102615030), mRNA	Yes
TR46616|c1_g1_i1	2.17055	4.03049	0.049884	2.35503e-08	GO:0003674,GO:0005488,GO:0005515	PREDICTED: Citrus sinensis protein ACCELERATED CELL DEATH 6-like (LOC102616734), mRNA	Yes	Yes
TR52320|c2_g1_i1	1.67081	.	0.0288878	.		Citrus clementina hypothetical protein (CICLE_v10026671mg) mRNA, complete cds
TR52320|c2_g1_i5	.	2.73205	.	0.00242839		Citrus clementina hypothetical protein (CICLE_v10026671mg) mRNA, complete cds
TR47968|c0_g1_i2	1.60532	1.7626	0.0262253	0.000201371	GO:0000166,GO:0001882,GO:0001883,GO:0003674,GO:0005488,GO:0005524,GO:0017076,GO:0030554,GO:0032549,GO:0032550,GO:0032553,GO:0032555,GO:0032559,GO:0035639,GO:0036094,GO:0043167,GO:0043168,GO:0097159,GO:0097367,GO:1901265,GO:1901363	Citrus clementina hypothetical protein (CICLE_v10025208mg) mRNA, complete cds
TR46109|c0_g1_i1	2.18715	2.37934	0.0168563	0.0145423		PREDICTED: Citrus sinensis basic 7S globulin-like (LOC102608082), mRNA
TR16679|c0_g1_i1	1.5387	1.12532	0.0410286	0.00773434		PREDICTED: Citrus sinensis glycine-rich protein A3-like (LOC102625576), mRNA
TR44281|c0_g1_i4	1.32446	1.41309	0.0220363	0.0221518	GO:0003674,GO:0003824,GO:0005488,GO:0008150,GO:0008152,GO:0048037	Citrus clementina hypothetical protein (CICLE_v10020931mg) mRNA, complete cds
TR52294|c0_g1_i5	-2.66481	2.27064	0.0040809	0.0258458		Citrus clementina hypothetical protein (CICLE_v10019215mg) mRNA, complete cds
TR52305|c0_g3_i5	1.45428	1.43869	0.000570403	2.29718e-06	GO:0003674,GO:0005488,GO:0005515	PREDICTED: Citrus sinensis ankyrin repeat-containing protein At3g12360-like (LOC102609177), mRNA	Yes	Yes
TR52305|c0_g3_i4	1.1809	1.08182	0.0411604	0.0364304	GO:0003674,GO:0005488,GO:0005515	PREDICTED: Citrus sinensis ankyrin repeat-containing protein At3g12360-like (LOC102609177), mRNA		Yes
TR52305|c0_g3_i1	.	1.95072	.	0.0410618	GO:0003674,GO:0005488,GO:0005515	PREDICTED: Citrus sinensis ankyrin repeat-containing protein At5g02620-like (LOC102608896), mRNA		Yes
TR51076|c1_g1_i2	2.63262	.	0.00484718	.	GO:0000166,GO:0003674,GO:0003824,GO:0003885,GO:0005488,GO:0005575,GO:0008150,GO:0008152,GO:0016020,GO:0016491,GO:0016614,GO:0016899,GO:0036094,GO:0043167,GO:0043168,GO:0044699,GO:0044710,GO:0048037,GO:0050660,GO:0050662,GO:0055114,GO:0097159,GO:1901265,GO:1901363	PREDICTED: Citrus sinensis L-galactono-1,4-lactone dehydrogenase, mitochondrial (LOC102611546), transcript variant X1, mRNA		Yes
TR51076|c1_g1_i5	.	2.5538	.	0.00676866		PREDICTED: Citrus sinensis L-galactono-1,4-lactone dehydrogenase, mitochondrial (LOC102611546), transcript variant X1, mRNA		Yes
TR50859|c0_g3_i13	2.64919	.	0.00278387	.		PREDICTED: Citrus sinensis cyclic nucleotide-gated ion channel 1-like (LOC102625781), mRNA		Yes
TR50859|c0_g3_i14	.	2.85951	.	2.12611e-05		PREDICTED: Citrus sinensis cyclic nucleotide-gated ion channel 1-like (LOC102625781), mRNA		Yes
TR50859|c0_g3_i12	.	2.98166	.	4.24886e-05		PREDICTED: Citrus sinensis cyclic nucleotide-gated ion channel 1-like (LOC102625781), mRNA		Yes
TR50859|c0_g3_i15	.	2.6666	.	0.000291679		Citrus clementina hypothetical protein (CICLE_v10004563mg) mRNA, complete cds		Yes
TR50859|c0_g3_i6	.	2.04688	.	0.0484136		Citrus clementina hypothetical protein (CICLE_v10004563mg) mRNA, complete cds
TR49375|c0_g1_i1	-2.06877	-2.42616	0.00521464	9.4284e-08		Citrus clementina hypothetical protein (CICLE_v10005974mg) mRNA, complete cds
TR74563|c0_g1_i1	1.82153	2.54504	0.000362039	2.13565e-15	GO:0003674,GO:0005488,GO:0005515	Citrus clementina hypothetical protein (CICLE_v10001930mg) mRNA, complete cds
TR51678|c4_g1_i1	2.46116	1.52498	0.00130862	0.0497384	GO:0003674,GO:0003824,GO:0016740,GO:0016746,GO:0016747	PREDICTED: Citrus sinensis shikimate O-hydroxycinnamoyltransferase-like (LOC102628720), transcript variant X1, mRNA
TR51678|c4_g1_i2	2.02572	.	0.00527468	.	GO:0003674,GO:0003824,GO:0016740,GO:0016746,GO:0016747	PREDICTED: Citrus sinensis shikimate O-hydroxycinnamoyltransferase-like (LOC102628720), transcript variant X2, mRNA
TR41925|c0_g1_i2	-1.33665	-2.38734	0.0156786	1.66936e-08	GO:0003674,GO:0003824,GO:0005488,GO:0005506,GO:0008150,GO:0008152,GO:0016491,GO:0016705,GO:0020037,GO:0043167,GO:0043169,GO:0044699,GO:0044710,GO:0046872,GO:0046906,GO:0046914,GO:0055114,GO:0097159,GO:1901363	PREDICTED: Citrus sinensis alkane hydroxylase MAH1-like (LOC107175896), mRNA		Yes
TR32548|c0_g1_i1	-1.08181	-1.6089	0.00177561	5.69185e-08		PREDICTED: Citrus sinensis haloacid dehalogenase-like hydrolase domain-containing protein 3 (LOC102620995), mRNA
TR54015|c4_g3_i5	1.91406	.	9.32913e-05	.		PREDICTED: Citrus sinensis uncharacterized LOC102627314 (LOC102627314), ncRNA
TR54015|c4_g3_i3	1.69508	.	0.0446535	.		PREDICTED: Citrus sinensis uncharacterized LOC102627314 (LOC102627314), ncRNA
TR54015|c4_g3_i1	.	1.28196	.	0.0158305		PREDICTED: Citrus sinensis uncharacterized LOC102627314 (LOC102627314), ncRNA
TR37626|c0_g1_i5	1.64835	2.27196	0.022029	0.00506843	GO:0003674,GO:0005488,GO:0005515,GO:0007165,GO:0008150,GO:0050789,GO:0050794,GO:0065007	PREDICTED: Citrus sinensis uncharacterized LOC107177116 (LOC107177116), mRNA
TR37626|c0_g1_i1	.	2.12834	.	0.0446364	GO:0003674,GO:0005488,GO:0005515,GO:0007165,GO:0008150,GO:0050789,GO:0050794,GO:0065007	PREDICTED: Citrus sinensis uncharacterized LOC107177116 (LOC107177116), mRNA
TR29319|c0_g1_i1	-1.99636	-2.17001	0.00885444	0.00149395		no hit
TR49038|c1_g1_i3	-2.42006	2.12192	0.0147932	0.044916		Citrus clementina hypothetical protein (CICLE_v10019014mg) mRNA, complete cds
TR43963|c1_g3_i2	2.68708	2.68403	8.10819e-05	9.17008e-08	GO:0000272,GO:0003674,GO:0003824,GO:0004553,GO:0005975,GO:0005976,GO:0008150,GO:0008152,GO:0009056,GO:0009057,GO:0016052,GO:0016160,GO:0016161,GO:0016787,GO:0016798,GO:0043170,GO:0044238,GO:0071704,GO:1901575	Citrus clementina hypothetical protein (CICLE_v10019566mg) mRNA, complete cds			Yes
TR43963|c1_g3_i1	2.92605	2.24791	0.000420093	0.00644961	GO:0000272,GO:0003674,GO:0003824,GO:0004553,GO:0005975,GO:0005976,GO:0008150,GO:0008152,GO:0009056,GO:0009057,GO:0016052,GO:0016160,GO:0016161,GO:0016787,GO:0016798,GO:0043170,GO:0044238,GO:0071704,GO:1901575	PREDICTED: Citrus sinensis beta-amylase 3, chloroplastic (LOC102577989), mRNA			Yes
TR47293|c0_g1_i3	2.75907	.	0.00238607	.	GO:0003674,GO:0003824,GO:0005488,GO:0006464,GO:0008150,GO:0008152,GO:0008270,GO:0009987,GO:0016579,GO:0016787,GO:0019538,GO:0036211,GO:0036459,GO:0043167,GO:0043169,GO:0043170,GO:0043412,GO:0044237,GO:0044238,GO:0044260,GO:0044267,GO:0046872,GO:0046914,GO:0070646,GO:0070647,GO:0071704	PREDICTED: Citrus sinensis U4/U6.U5 tri-snRNP-associated protein 2-like (LOC102617640), transcript variant X4, mRNA
TR47293|c0_g1_i7	.	-1.34146	.	0.0307149	GO:0003674,GO:0003824,GO:0005488,GO:0006464,GO:0008150,GO:0008152,GO:0008270,GO:0009987,GO:0016579,GO:0016787,GO:0019538,GO:0036211,GO:0036459,GO:0043167,GO:0043169,GO:0043170,GO:0043412,GO:0044237,GO:0044238,GO:0044260,GO:0044267,GO:0046872,GO:0046914,GO:0070646,GO:0070647,GO:0071704	PREDICTED: Citrus sinensis U4/U6.U5 tri-snRNP-associated protein 2-like (LOC102617640), transcript variant X2, mRNA
TR48838|c2_g1_i2	-1.38845	-1.79927	0.00524855	4.74263e-10	GO:0000988,GO:0000990,GO:0000996,GO:0001071,GO:0003674,GO:0003676,GO:0003677,GO:0003700,GO:0005488,GO:0006139,GO:0006352,GO:0006355,GO:0006725,GO:0006807,GO:0008150,GO:0008152,GO:0009058,GO:0009059,GO:0009889,GO:0009987,GO:0010468,GO:0010556,GO:0016070,GO:0016987,GO:0018130,GO:0019219,GO:0019222,GO:0019438,GO:0031323,GO:0031326,GO:0032774,GO:0034641,GO:0034654,GO:0043170,GO:0044237,GO:0044238,GO:…	Citrus clementina hypothetical protein (CICLE_v10004760mg) mRNA, complete cds
TR48838|c2_g1_i1	-1.65932	.	0.0083183	.	GO:0000988,GO:0000990,GO:0000996,GO:0001071,GO:0003674,GO:0003676,GO:0003677,GO:0003700,GO:0005488,GO:0006139,GO:0006352,GO:0006355,GO:0006725,GO:0006807,GO:0008150,GO:0008152,GO:0009058,GO:0009059,GO:0009889,GO:0009987,GO:0010468,GO:0010556,GO:0016070,GO:0016987,GO:0018130,GO:0019219,GO:0019222,GO:0019438,GO:0031323,GO:0031326,GO:0032774,GO:0034641,GO:0034654,GO:0043170,GO:0044237,GO:0044238,GO:…	Citrus clementina hypothetical protein (CICLE_v10004760mg) mRNA, complete cds
TR45103|c0_g2_i4	-2.21217	.	0.0210921	.	GO:0003674,GO:0005488,GO:0005515	PREDICTED: Citrus sinensis SNF1-related protein kinase regulatory subunit beta-2-like (LOC102617730), transcript variant X1, mRNA
TR45103|c0_g2_i2	.	2.61673	.	0.00462258		PREDICTED: Citrus sinensis SNF1-related protein kinase regulatory subunit beta-2-like (LOC102617730), transcript variant X3, mRNA
TR51523|c0_g2_i1	-1.82243	.	0.0124447	.		PREDICTED: Citrus sinensis lysine-specific demethylase JMJ25 (LOC102630420), transcript variant X5, mRNA		Yes
TR51523|c0_g2_i4	.	2.79953	.	0.00135273	GO:0003674,GO:0005488,GO:0005509,GO:0005575,GO:0008150,GO:0008152,GO:0009521,GO:0009523,GO:0009654,GO:0009987,GO:0015979,GO:0019898,GO:0032991,GO:0043167,GO:0043169,GO:0043234,GO:0044237,GO:0044424,GO:0044425,GO:0044436,GO:0044464,GO:0046872,GO:1902494,GO:1990204	Citrus clementina hypothetical protein (CICLE_v10000178mg) mRNA, complete cds		Yes
TR50509|c0_g1_i1	-1.74843	-1.70471	0.0124957	6.37117e-07	GO:0003674,GO:0003824,GO:0008150,GO:0008152,GO:0016740,GO:0016757,GO:0016758	PREDICTED: Citrus sinensis UDP-glycosyltransferase 83A1-like (LOC102629191), mRNA
TR47257|c2_g1_i1	-2.15263	-1.88743	0.00015505	9.41335e-06	GO:0003674,GO:0003824,GO:0008150,GO:0008152,GO:0016491,GO:0044699,GO:0044710,GO:0055114	Citrus clementina hypothetical protein (CICLE_v10000235mg) mRNA, complete cds
TR49424|c0_g3_i11	2.75131	.	0.0024081	.		PREDICTED: Citrus sinensis F-box protein PP2-B3-like (LOC102625778), transcript variant X1, mRNA
TR49424|c0_g3_i9	.	3.1896	.	9.65406e-05		PREDICTED: Citrus sinensis uncharacterized LOC102622724 (LOC102622724), ncRNA
TR43964|c0_g1_i1	1.2387	.	0.019237	.		Citrus clementina hypothetical protein (CICLE_v10021025mg) mRNA, complete cds
TR43964|c0_g1_i2	.	1.4187	.	0.0264852		Citrus clementina hypothetical protein (CICLE_v10021025mg) mRNA, complete cds
TR50967|c1_g3_i7	-3.16096	.	0.000135681	.		PREDICTED: Citrus sinensis uncharacterized LOC107178084 (LOC107178084), ncRNA
TR50967|c1_g3_i5	.	2.59144	.	0.00550958		PREDICTED: Citrus sinensis uncharacterized LOC107178084 (LOC107178084), ncRNA
TR50967|c1_g3_i1	.	2.26382	.	0.0264685		PREDICTED: Citrus sinensis uncharacterized LOC107178084 (LOC107178084), ncRNA
TR54237|c3_g2_i8	-1.36868	.	0.0355223	.		PREDICTED: Citrus sinensis uncharacterized LOC102616669 (LOC102616669), transcript variant X2, ncRNA
TR54237|c3_g2_i5	.	-2.4433	.	0.000848908		PREDICTED: Citrus sinensis uncharacterized LOC102616669 (LOC102616669), transcript variant X8, ncRNA
TR37208|c0_g3_i1	-2.41228	-2.67594	5.95856e-09	2.14231e-08	GO:0003674,GO:0005488,GO:0005515	PREDICTED: Citrus sinensis LRR receptor-like serine/threonine-protein kinase GSO1 (LOC102609377), mRNA	Yes	Yes
TR41127|c0_g3_i1	-1.55664	-1.56694	0.00394519	0.00345106	GO:0003674,GO:0003824,GO:0005488,GO:0005515,GO:0006508,GO:0008150,GO:0008152,GO:0008233,GO:0008236,GO:0016787,GO:0017171,GO:0019538,GO:0043170,GO:0044238,GO:0070011,GO:0071704	PREDICTED: Citrus sinensis carboxyl-terminal-processing peptidase 3, chloroplastic (LOC102624481), transcript variant X1, mRNA			Yes
TR37165|c0_g1_i1	-1.65142	-1.18769	0.0385878	0.00374456	GO:0003674,GO:0003824,GO:0008150,GO:0008152,GO:0009058,GO:0016851,GO:0016874,GO:0051002,GO:0051003	PREDICTED: Citrus sinensis magnesium-chelatase subunit ChlH, chloroplastic (LOC102616348), mRNA		Yes	Yes
TR54613|c1_g21_i1	1.37488	.	0.0161038	.	GO:0003674,GO:0003824,GO:0016491	Citrus clementina hypothetical protein (CICLE_v10025921mg) mRNA, complete cds
TR54613|c1_g21_i2	.	1.09099	.	0.044916	GO:0003674,GO:0003824,GO:0016491	Citrus clementina hypothetical protein (CICLE_v10025729mg) mRNA, complete cds
TR36843|c0_g1_i3	1.14424	.	0.0411604	.	GO:0003674,GO:0005488,GO:0005515,GO:0006810,GO:0006886,GO:0008104,GO:0008150,GO:0008270,GO:0015031,GO:0016192,GO:0033036,GO:0043167,GO:0043169,GO:0045184,GO:0046872,GO:0046907,GO:0046914,GO:0051179,GO:0051234,GO:0051649,GO:0071702	PREDICTED: Citrus sinensis vacuolar protein-sorting-associated protein 11 homolog (LOC102608971), transcript variant X1, mRNA		Yes
TR36843|c0_g1_i9	.	1.63544	.	0.000930696		PREDICTED: Citrus sinensis expansin-like A1 (LOC102629326), mRNA		Yes
TR47115|c0_g1_i1	-1.60494	-1.43498	0.000172674	0.0015372	GO:0003674,GO:0003824,GO:0008150,GO:0008152	PREDICTED: Citrus sinensis 4-coumarate--CoA ligase 2-like (LOC102629456), mRNA		Yes
TR53090|c0_g3_i10	2.58939	4.06326	0.00351099	4.00485e-10		PREDICTED: Citrus sinensis protein ACCELERATED CELL DEATH 6-like (LOC102616734), mRNA	Yes	Yes
TR53090|c0_g3_i11	.	3.0947	.	6.65245e-05		PREDICTED: Citrus sinensis ankyrin repeat-containing protein At5g02620-like (LOC102617670), mRNA		Yes
TR45253|c0_g1_i6	1.69863	.	0.00942576	.	GO:0003674,GO:0005488,GO:0008270,GO:0043167,GO:0043169,GO:0046872,GO:0046914	Citrus clementina hypothetical protein (CICLE_v10014295mg) mRNA, complete cds
TR45253|c0_g1_i5	.	-2.05089	.	0.0231001		Citrus clementina hypothetical protein (CICLE_v10014295mg) mRNA, complete cds
TR46192|c0_g1_i2	1.0433	1.07713	0.00227883	0.0457541		PREDICTED: Citrus sinensis ACT domain-containing protein DS12, chloroplastic (LOC102622950), transcript variant X1, mRNA		Yes	Yes
TR36221|c0_g3_i1	2.31009	2.07155	0.0187661	0.00990237		Citrus clementina hypothetical protein (CICLE_v10005927mg) mRNA, complete cds
TR51844|c0_g1_i3	-2.35296	-2.33374	0.0207439	0.0196399	GO:0003674,GO:0005488,GO:0005515	PREDICTED: Citrus sinensis ankyrin repeat-containing protein At5g02620-like (LOC102623194), transcript variant X2, mRNA	Yes	Yes
TR51844|c0_g1_i8	.	2.20166	.	0.0208914	GO:0003674,GO:0005488,GO:0005515	PREDICTED: Citrus sinensis ankyrin repeat-containing protein At3g12360-like (LOC102623671), transcript variant X2, mRNA		Yes
TR5918|c0_g1_i1	-1.38026	-1.29534	0.00040191	0.0060998	GO:0003674,GO:0003676,GO:0003677,GO:0005488,GO:0006355,GO:0008150,GO:0009889,GO:0010468,GO:0010556,GO:0019219,GO:0019222,GO:0031323,GO:0031326,GO:0050789,GO:0050794,GO:0051171,GO:0051252,GO:0060255,GO:0065007,GO:0080090,GO:0097159,GO:1901363,GO:1903506,GO:2000112,GO:2001141	PREDICTED: Citrus sinensis cyclic dof factor 3 (LOC102629672), mRNA
TR43541|c0_g1_i9	2.30446	.	0.0227465	.		PREDICTED: Citrus sinensis uncharacterized LOC102610375 (LOC102610375), transcript variant X1, mRNA
TR43541|c0_g1_i8	2.02204	.	0.0404915	.		PREDICTED: Citrus sinensis uncharacterized LOC102610375 (LOC102610375), transcript variant X2, mRNA
TR43541|c0_g1_i1	.	1.21753	.	0.0239145		PREDICTED: Citrus sinensis uncharacterized LOC102610375 (LOC102610375), transcript variant X3, mRNA
TR48974|c0_g1_i7	-2.68815	.	0.00338732	.		Citrus clementina hypothetical protein (CICLE_v10021359mg) mRNA, complete cds
TR48974|c0_g1_i1	.	3.08693	.	0.000219719		Citrus clementina hypothetical protein (CICLE_v10021359mg) mRNA, complete cds
TR48391|c0_g1_i6	-1.76516	.	0.00534048	.	GO:0003674,GO:0005215,GO:0005575,GO:0006810,GO:0008150,GO:0009987,GO:0016021,GO:0022857,GO:0031224,GO:0044425,GO:0044699,GO:0044763,GO:0044765,GO:0051179,GO:0051234,GO:0055085,GO:1902578	Citrus clementina hypothetical protein (CICLE_v10020116mg) mRNA, complete cds		Yes
TR48391|c0_g1_i9	-1.27439	.	0.0203449	.		PREDICTED: Citrus sinensis inositol transporter 1 (LOC102619380), mRNA		Yes
TR48391|c0_g1_i2	.	-1.47907	.	1.84654e-05	GO:0003674,GO:0005215,GO:0005575,GO:0006810,GO:0008150,GO:0009987,GO:0016021,GO:0022857,GO:0031224,GO:0044425,GO:0044699,GO:0044763,GO:0044765,GO:0051179,GO:0051234,GO:0055085,GO:1902578	Citrus clementina hypothetical protein (CICLE_v10020116mg) mRNA, complete cds
TR48391|c0_g1_i8	.	-2.05371	.	0.00817898	GO:0003674,GO:0005215,GO:0005575,GO:0006810,GO:0008150,GO:0009987,GO:0016021,GO:0022857,GO:0031224,GO:0044425,GO:0044699,GO:0044763,GO:0044765,GO:0051179,GO:0051234,GO:0055085,GO:1902578	PREDICTED: Citrus sinensis inositol transporter 1 (LOC102619380), mRNA		Yes
TR40328|c2_g6_i1	2.14857	1.87652	0.000471797	0.00474357		PREDICTED: Citrus sinensis uncharacterized LOC107175651 (LOC107175651), ncRNA
TR52797|c1_g1_i3	-1.38565	-1.75602	0.0033613	0.00378972		PREDICTED: Citrus sinensis uncharacterized LOC102613895 (LOC102613895), transcript variant X1, ncRNA
TR52797|c1_g1_i4	.	-1.31351	.	0.00339877		PREDICTED: Citrus sinensis uncharacterized LOC102613895 (LOC102613895), transcript variant X1, ncRNA
TR29398|c0_g1_i1	-1.64581	-1.78586	0.00524855	0.000763465		PREDICTED: Citrus sinensis protochlorophyllide-dependent translocon component 52, chloroplastic (LOC102615553), mRNA		Yes	Yes
TR35803|c0_g1_i1	1.61766	1.62441	0.009268	0.0122189	GO:0003674,GO:0003824,GO:0008150,GO:0008152,GO:0016740,GO:0016757,GO:0016758	PREDICTED: Citrus sinensis anthocyanidin 3-O-glucosyltransferase 2-like (LOC102627218), transcript variant X1, mRNA
TR48920|c0_g1_i10	-2.40343	.	4.45367e-06	.	GO:0003674,GO:0003824,GO:0004842,GO:0006464,GO:0008150,GO:0008152,GO:0009987,GO:0016567,GO:0016740,GO:0019538,GO:0019787,GO:0032446,GO:0036211,GO:0043170,GO:0043412,GO:0044237,GO:0044238,GO:0044260,GO:0044267,GO:0070647,GO:0071704	Citrus clementina hypothetical protein (CICLE_v10030762mg) mRNA, complete cds
TR48920|c0_g1_i3	.	-5.37476	.	3.86583e-17	GO:0003674,GO:0003824,GO:0004842,GO:0006464,GO:0008150,GO:0008152,GO:0009987,GO:0016567,GO:0016740,GO:0019538,GO:0019787,GO:0032446,GO:0036211,GO:0043170,GO:0043412,GO:0044237,GO:0044238,GO:0044260,GO:0044267,GO:0070647,GO:0071704	Citrus clementina hypothetical protein (CICLE_v10030762mg) mRNA, complete cds
TR54855|c3_g1_i1	2.37122	.	0.000925466	.	GO:0003674,GO:0005488,GO:0005515	PREDICTED: Citrus sinensis probable LRR receptor-like serine/threonine-protein kinase At3g47570 (LOC102612090), transcript variant X2, mRNA	Yes	Yes
TR54855|c3_g1_i3	.	1.36962	.	0.0372234	GO:0003674,GO:0005488,GO:0005515	PREDICTED: Citrus sinensis putative receptor-like protein kinase At3g47110 (LOC102620588), mRNA		Yes
TR36287|c0_g2_i1	1.82463	2.16864	0.0365906	0.00938502		PREDICTED: Citrus sinensis cyclic nucleotide-gated ion channel 1-like (LOC102626748), mRNA		Yes
TR36287|c0_g3_i5	2.52181	2.30255	1.2729e-06	2.63494e-06		PREDICTED: Citrus sinensis cyclic nucleotide-gated ion channel 1-like (LOC102626748), mRNA		Yes
TR36287|c0_g3_i4	2.11746	3.20651	0.0203449	1.6236e-11		PREDICTED: Citrus sinensis cyclic nucleotide-gated ion channel 1-like (LOC102626748), mRNA		Yes
TR36287|c0_g3_i3	.	3.55683	.	5.17114e-11		PREDICTED: Citrus sinensis cyclic nucleotide-gated ion channel 1-like (LOC102626748), mRNA		Yes
TR36287|c0_g3_i6	.	2.31201	.	2.30876e-05		PREDICTED: Citrus sinensis cyclic nucleotide-gated ion channel 1-like (LOC102626748), mRNA		Yes
TR36287|c0_g3_i1	.	2.18071	.	0.0361242		PREDICTED: Citrus sinensis cyclic nucleotide-gated ion channel 1-like (LOC102626748), mRNA		Yes
TR52301|c0_g1_i3	1.08769	1.00473	0.0112406	0.0200259	GO:0000155,GO:0000160,GO:0003674,GO:0003824,GO:0004672,GO:0004673,GO:0004871,GO:0004872,GO:0005057,GO:0005488,GO:0005515,GO:0007165,GO:0008150,GO:0016301,GO:0016740,GO:0016772,GO:0016773,GO:0016775,GO:0035556,GO:0038023,GO:0050789,GO:0050794,GO:0060089,GO:0065007	Citrus clementina hypothetical protein (CICLE_v10019003mg) mRNA, complete cds
TR45707|c0_g1_i5	1.64992	1.5105	0.0237156	0.00904953	GO:0003674,GO:0003824,GO:0008150,GO:0008152,GO:0016491,GO:0044699,GO:0044710,GO:0055114	PREDICTED: Citrus sinensis 1-aminocyclopropane-1-carboxylate oxidase 5 (LOC102630352), mRNA	Yes
TR45707|c0_g1_i3	.	1.50601	.	0.00272186		Citrus clementina hypothetical protein (CICLE_v10022512mg) mRNA, complete cds
TR45707|c0_g1_i4	.	1.40371	.	0.0180926		PREDICTED: Citrus sinensis uncharacterized LOC102630759 (LOC102630759), transcript variant X3, mRNA
TR45707|c0_g1_i8	.	1.30194	.	0.0215081	GO:0003674,GO:0003824,GO:0008150,GO:0008152,GO:0016491,GO:0044699,GO:0044710,GO:0055114	PREDICTED: Citrus sinensis 1-aminocyclopropane-1-carboxylate oxidase 5 (LOC102630352), mRNA
TR47257|c0_g1_i1	-2.09769	-1.70802	0.00214213	0.0385407		PREDICTED: Citrus sinensis ferric reduction oxidase 7, chloroplastic-like (LOC102627420), mRNA		Yes	Yes
TR46993|c0_g1_i12	2.47705	.	0.0104832	.		PREDICTED: Citrus sinensis uncharacterized LOC107174909 (LOC107174909), mRNA
TR46993|c0_g1_i7	.	4.40047	.	1.58511e-10		PREDICTED: Citrus sinensis uncharacterized LOC107174909 (LOC107174909), mRNA
TR46993|c0_g1_i13	.	2.83023	.	0.000427748		PREDICTED: Citrus sinensis uncharacterized LOC107174909 (LOC107174909), mRNA
TR46993|c0_g1_i31	.	2.083	.	0.0481636		Citrus clementina hypothetical protein (CICLE_v10002547mg) mRNA, complete cds
TR51174|c1_g1_i6	-2.97991	.	0.000238947	.	GO:0006810,GO:0008150,GO:0009987,GO:0044699,GO:0044763,GO:0044765,GO:0051179,GO:0051234,GO:0055085,GO:1902578	PREDICTED: Citrus sinensis UDP-galactose/UDP-glucose transporter 2 (LOC102609568), transcript variant X3, misc_RNA		Yes
TR51174|c1_g1_i5	2.36162	.	0.0193325	.	GO:0006810,GO:0008150,GO:0009987,GO:0044699,GO:0044763,GO:0044765,GO:0051179,GO:0051234,GO:0055085,GO:1902578	Citrus clementina hypothetical protein (CICLE_v10020837mg) mRNA, complete cds
TR51174|c1_g1_i7	.	-2.28494	.	0.00276064	GO:0006810,GO:0008150,GO:0009987,GO:0044699,GO:0044763,GO:0044765,GO:0051179,GO:0051234,GO:0055085,GO:1902578	PREDICTED: Citrus sinensis UDP-galactose/UDP-glucose transporter 2 (LOC102609568), transcript variant X2, mRNA		Yes
TR53646|c2_g1_i18	-2.89728	.	5.20605e-05	.		PREDICTED: Citrus sinensis ribonuclease J (LOC102606767), transcript variant X1, mRNA
TR53646|c2_g1_i8	.	-1.51864	.	0.0446364		PREDICTED: Citrus sinensis ribonuclease J (LOC102606767), transcript variant X1, mRNA
TR48608|c0_g1_i1	-2.47165	-2.62788	1.49413e-14	5.44552e-09	GO:0000166,GO:0001882,GO:0001883,GO:0003674,GO:0003824,GO:0005488,GO:0005524,GO:0005575,GO:0016020,GO:0016462,GO:0016787,GO:0016817,GO:0016818,GO:0016887,GO:0017076,GO:0017111,GO:0030554,GO:0032549,GO:0032550,GO:0032553,GO:0032555,GO:0032559,GO:0035639,GO:0036094,GO:0043167,GO:0043168,GO:0097159,GO:0097367,GO:1901265,GO:1901363	PREDICTED: Citrus sinensis ABC transporter G family member 11-like (LOC102624748), mRNA		Yes
TR48608|c0_g1_i2	.	-3.52989	.	1.24701e-18	GO:0000166,GO:0001882,GO:0001883,GO:0003674,GO:0003824,GO:0005488,GO:0005524,GO:0016462,GO:0016787,GO:0016817,GO:0016818,GO:0016887,GO:0017076,GO:0017111,GO:0030554,GO:0032549,GO:0032550,GO:0032553,GO:0032555,GO:0032559,GO:0035639,GO:0036094,GO:0043167,GO:0043168,GO:0097159,GO:0097367,GO:1901265,GO:1901363	PREDICTED: Citrus sinensis ABC transporter G family member 11-like (LOC102624748), mRNA		Yes
TR41122|c1_g1_i1	2.29774	.	0.027229	.	GO:0003674,GO:0005488,GO:0005515	PREDICTED: Citrus sinensis putative receptor-like protein kinase At3g47110 (LOC102620588), mRNA		Yes
TR41122|c1_g1_i6	.	2.11387	.	0.0452429	GO:0003674,GO:0005488,GO:0005515	PREDICTED: Citrus sinensis putative receptor-like protein kinase At3g47110 (LOC102620588), mRNA		Yes
TR50641|c0_g1_i3	-2.21851	2.6489	0.0394585	0.00387128		Citrus clementina hypothetical protein (CICLE_v10019026mg) mRNA, complete cds
TR53386|c0_g1_i1	3.14791	.	0.000149831	.		PREDICTED: Citrus sinensis putative pentatricopeptide repeat-containing protein At1g74580 (LOC102618705), transcript variant X1, misc_RNA		Yes
TR53386|c0_g1_i4	.	2.53941	.	0.00550515		PREDICTED: Citrus sinensis putative pentatricopeptide repeat-containing protein At1g74580 (LOC102618705), transcript variant X1, misc_RNA		Yes
TR51268|c0_g2_i2	-1.68609	-1.87718	0.000238947	0.0016849		Citrus clementina hypothetical protein (CICLE_v10020503mg) mRNA, complete cds
TR51268|c0_g2_i3	-1.24902	-1.05092	0.00548788	0.0446364	GO:0000166,GO:0003674,GO:0003824,GO:0004497,GO:0004499,GO:0005488,GO:0008150,GO:0008152,GO:0016491,GO:0016705,GO:0016709,GO:0036094,GO:0043167,GO:0043168,GO:0044699,GO:0044710,GO:0048037,GO:0050660,GO:0050661,GO:0050662,GO:0055114,GO:0097159,GO:1901265,GO:1901363	Citrus clementina hypothetical protein (CICLE_v10020494mg) mRNA, complete cds
TR52755|c1_g1_i10	-3.50032	.	2.04036e-06	.		PREDICTED: Citrus sinensis uncharacterized LOC102617481 (LOC102617481), mRNA
TR52755|c1_g1_i7	.	-1.65053	.	0.0389728		PREDICTED: Citrus sinensis uncharacterized LOC102617481 (LOC102617481), mRNA
TR52124|c1_g1_i1	1.41885	1.24143	0.0125135	0.000590158	GO:0003674,GO:0003824,GO:0004553,GO:0004559,GO:0005488,GO:0005975,GO:0005996,GO:0006013,GO:0008150,GO:0008152,GO:0008270,GO:0015923,GO:0016787,GO:0016798,GO:0019318,GO:0043167,GO:0043169,GO:0044238,GO:0044699,GO:0044710,GO:0044723,GO:0046872,GO:0046914,GO:0071704	PREDICTED: Citrus sinensis alpha-mannosidase-like (LOC102627684), transcript variant X2, mRNA
TR52124|c1_g1_i5	1.27791	1.27668	0.0128917	0.0102	GO:0003674,GO:0003824,GO:0004553,GO:0004559,GO:0005488,GO:0005975,GO:0005996,GO:0006013,GO:0008150,GO:0008152,GO:0008270,GO:0015923,GO:0016787,GO:0016798,GO:0019318,GO:0043167,GO:0043169,GO:0044238,GO:0044699,GO:0044710,GO:0044723,GO:0046872,GO:0046914,GO:0071704	PREDICTED: Citrus sinensis alpha-mannosidase-like (LOC102627684), transcript variant X2, mRNA
TR52124|c1_g1_i4	.	1.51354	.	0.0254755	GO:0003674,GO:0003824,GO:0004553,GO:0004559,GO:0005488,GO:0005975,GO:0008150,GO:0008152,GO:0008270,GO:0015923,GO:0016787,GO:0016798,GO:0043167,GO:0043169,GO:0044238,GO:0046872,GO:0046914,GO:0071704	PREDICTED: Citrus sinensis alpha-mannosidase-like (LOC102627684), transcript variant X2, mRNA
TR54399|c1_g2_i1	2.23771	2.21079	0.0300617	0.0226593	GO:0003674,GO:0003824,GO:0003968,GO:0016740,GO:0016772,GO:0016779,GO:0034062	PREDICTED: Citrus sinensis probable RNA-dependent RNA polymerase 1 (LOC102610690), transcript variant X2, mRNA
TR40281|c0_g1_i5	-3.20973	.	8.37033e-05	.	GO:0000166,GO:0003674,GO:0003824,GO:0004497,GO:0004499,GO:0005488,GO:0008150,GO:0008152,GO:0016491,GO:0016705,GO:0016709,GO:0036094,GO:0043167,GO:0043168,GO:0044699,GO:0044710,GO:0048037,GO:0050660,GO:0050661,GO:0050662,GO:0055114,GO:0097159,GO:1901265,GO:1901363	Citrus clementina hypothetical protein (CICLE_v10019939mg) mRNA, complete cds		Yes
TR40281|c0_g1_i1	2.80436	.	0.00170374	.	GO:0000166,GO:0003674,GO:0003824,GO:0004497,GO:0004499,GO:0005488,GO:0008150,GO:0008152,GO:0016491,GO:0016705,GO:0016709,GO:0036094,GO:0043167,GO:0043168,GO:0044699,GO:0044710,GO:0048037,GO:0050660,GO:0050661,GO:0050662,GO:0055114,GO:0097159,GO:1901265,GO:1901363	Citrus clementina hypothetical protein (CICLE_v10019939mg) mRNA, complete cds
TR40281|c0_g1_i7	.	2.92431	.	0.000664561	GO:0000166,GO:0003674,GO:0003824,GO:0004497,GO:0004499,GO:0005488,GO:0008150,GO:0008152,GO:0016491,GO:0016705,GO:0016709,GO:0036094,GO:0043167,GO:0043168,GO:0044699,GO:0044710,GO:0048037,GO:0050660,GO:0050661,GO:0050662,GO:0055114,GO:0071949,GO:0097159,GO:1901265,GO:1901363	PREDICTED: Citrus sinensis flavin-containing monooxygenase FMO GS-OX-like 4 (LOC102619983), mRNA		Yes
TR53066|c0_g2_i4	-2.16691	3.58034	0.0436402	9.41707e-07	GO:0003674,GO:0003824,GO:0004553,GO:0004559,GO:0004571,GO:0005488,GO:0005509,GO:0005575,GO:0015923,GO:0015924,GO:0016020,GO:0016787,GO:0016798,GO:0043167,GO:0043169,GO:0046872	PREDICTED: Citrus sinensis probable alpha-mannosidase I MNS5 (LOC102628233), transcript variant X1, mRNA		Yes
TR54638|c4_g4_i1	-2.10823	-2.31343	0.000242291	1.81668e-06	GO:0003674,GO:0005488,GO:0005515	PREDICTED: Citrus sinensis probable LRR receptor-like serine/threonine-protein kinase At1g34110 (LOC102609281), mRNA	Yes	Yes
TR54638|c4_g4_i2	-1.24627	-1.48325	0.00465225	0.0159652	GO:0003674,GO:0005488,GO:0005515	Citrus clementina hypothetical protein (CICLE_v10007341mg) mRNA, complete cds
TR48576|c0_g4_i2	1.83541	.	0.000420093	.		PREDICTED: Citrus sinensis uncharacterized LOC102611697 (LOC102611697), transcript variant X2, mRNA
TR48576|c0_g4_i1	.	2.23758	.	9.65406e-05		PREDICTED: Citrus sinensis uncharacterized LOC102611697 (LOC102611697), transcript variant X2, mRNA
TR52702|c1_g1_i1	-1.46972	-1.25587	0.00629326	0.00106348	GO:0003674,GO:0003824,GO:0004375,GO:0006082,GO:0006520,GO:0006544,GO:0006546,GO:0006807,GO:0008150,GO:0008152,GO:0009056,GO:0009063,GO:0009069,GO:0009071,GO:0009987,GO:0016054,GO:0016491,GO:0016638,GO:0016642,GO:0019752,GO:0043436,GO:0044237,GO:0044238,GO:0044248,GO:0044281,GO:0044282,GO:0044699,GO:0044710,GO:0044712,GO:0044763,GO:0046395,GO:0055114,GO:0071704,GO:1901564,GO:1901565,GO:1901575,GO:…	Citrus clementina hypothetical protein (CICLE_v10007310mg) mRNA, complete cds
TR47257|c1_g2_i1	-1.99176	-1.98882	0.00379063	5.11639e-08	GO:0003674,GO:0003824,GO:0008150,GO:0008152,GO:0016491,GO:0044699,GO:0044710,GO:0055114	PREDICTED: Citrus sinensis ferric reduction oxidase 7, chloroplastic-like (LOC102627420), mRNA		Yes	Yes
TR54295|c0_g1_i6	2.68998	.	0.00346928	.	GO:0000166,GO:0001882,GO:0003674,GO:0003676,GO:0003677,GO:0003824,GO:0003887,GO:0004518,GO:0004527,GO:0005488,GO:0006139,GO:0006259,GO:0006260,GO:0006725,GO:0006807,GO:0008150,GO:0008152,GO:0008408,GO:0009058,GO:0009059,GO:0009987,GO:0016740,GO:0016772,GO:0016779,GO:0016787,GO:0016788,GO:0034061,GO:0034641,GO:0034645,GO:0036094,GO:0043170,GO:0044237,GO:0044238,GO:0044249,GO:0044260,GO:0046483,GO:…	PREDICTED: Citrus sinensis DNA polymerase alpha catalytic subunit (LOC102618566), mRNA
TR54295|c0_g1_i7	.	3.68766	.	1.1865e-06	GO:0000166,GO:0001882,GO:0003674,GO:0003676,GO:0003677,GO:0003824,GO:0003887,GO:0004518,GO:0004527,GO:0005488,GO:0006139,GO:0006259,GO:0006260,GO:0006725,GO:0006807,GO:0008150,GO:0008152,GO:0008408,GO:0009058,GO:0009059,GO:0009987,GO:0016740,GO:0016772,GO:0016779,GO:0016787,GO:0016788,GO:0034061,GO:0034641,GO:0034645,GO:0036094,GO:0043170,GO:0044237,GO:0044238,GO:0044249,GO:0044260,GO:0046483,GO:…	PREDICTED: Citrus sinensis DNA polymerase alpha catalytic subunit (LOC102618566), mRNA
TR45117|c0_g2_i4	-3.35054	.	2.10384e-05	.		PREDICTED: Citrus sinensis amino acid permease 3 (LOC102625596), mRNA		Yes
TR45117|c0_g2_i14	.	-3.14073	.	4.46989e-10		PREDICTED: Citrus sinensis amino acid permease 3 (LOC102625596), mRNA		Yes
TR45117|c0_g2_i11	.	-2.0112	.	6.51378e-05		PREDICTED: Citrus sinensis amino acid permease 3 (LOC102625596), mRNA		Yes
TR54200|c4_g1_i15	-3.16435	.	0.000114714	.		PREDICTED: Citrus sinensis probable starch synthase 4, chloroplastic/amyloplastic (LOC102630794), transcript variant X2, mRNA			Yes
TR54200|c4_g1_i7	-2.39967	.	0.0163591	.		PREDICTED: Citrus sinensis probable starch synthase 4, chloroplastic/amyloplastic (LOC102630794), transcript variant X2, mRNA			Yes
TR54200|c4_g1_i9	1.86046	.	0.0455664	.		PREDICTED: Citrus sinensis probable starch synthase 4, chloroplastic/amyloplastic (LOC102630794), transcript variant X2, mRNA			Yes
TR54200|c4_g1_i5	.	2.47676	.	0.0100366		PREDICTED: Citrus sinensis probable starch synthase 4, chloroplastic/amyloplastic (LOC102630794), transcript variant X2, mRNA			Yes
TR52644|c0_g1_i4	-1.23689	-1.06024	0.000961589	0.0491556		PREDICTED: Citrus sinensis probable galactinol--sucrose galactosyltransferase 6 (LOC102620630), transcript variant X2, mRNA
TR52644|c0_g1_i3	-1.26822	-1.16004	0.00846729	0.0325866		PREDICTED: Citrus sinensis probable galactinol--sucrose galactosyltransferase 6 (LOC102620630), transcript variant X1, mRNA
TR52644|c0_g1_i1	.	-1.01032	.	0.0172405		PREDICTED: Citrus sinensis probable galactinol--sucrose galactosyltransferase 6 (LOC102620630), transcript variant X1, mRNA
TR46659|c0_g1_i5	1.25453	1.5229	0.0222558	0.00775775	GO:0006629,GO:0008150,GO:0008152,GO:0044238,GO:0044699,GO:0044710,GO:0071704	PREDICTED: Citrus sinensis patatin-like protein 1 (LOC102614111), transcript variant X1, mRNA	Yes	Yes
TR46659|c0_g1_i2	.	2.40188	.	0.000144905	GO:0006629,GO:0008150,GO:0008152,GO:0044238,GO:0044699,GO:0044710,GO:0071704	PREDICTED: Citrus sinensis patatin-like protein 1 (LOC102614111), transcript variant X1, mRNA		Yes
TR46659|c0_g1_i3	.	1.80636	.	0.00550958	GO:0006629,GO:0008150,GO:0008152,GO:0044238,GO:0044699,GO:0044710,GO:0071704	PREDICTED: Citrus sinensis patatin-like protein 1 (LOC102614111), transcript variant X1, mRNA		Yes
TR29545|c0_g1_i1	-1.15766	-1.78516	0.0231196	0.000221779	GO:0001071,GO:0003674,GO:0003700,GO:0006355,GO:0008150,GO:0009889,GO:0010468,GO:0010556,GO:0019219,GO:0019222,GO:0031323,GO:0031326,GO:0050789,GO:0050794,GO:0051171,GO:0051252,GO:0060255,GO:0065007,GO:0080090,GO:1903506,GO:2000112,GO:2001141	Citrus clementina hypothetical protein (CICLE_v10015144mg) mRNA, complete cds
TR54753|c1_g2_i5	-1.30916	.	0.024597	.	GO:0003674,GO:0003824,GO:0005488,GO:0005515,GO:0006508,GO:0006810,GO:0006886,GO:0008104,GO:0008150,GO:0008152,GO:0008233,GO:0008236,GO:0015031,GO:0016192,GO:0016787,GO:0017171,GO:0019538,GO:0033036,GO:0043170,GO:0044238,GO:0045184,GO:0046907,GO:0051179,GO:0051234,GO:0051649,GO:0070011,GO:0071702,GO:0071704	PREDICTED: Citrus sinensis vacuolar protein sorting-associated protein 41 homolog (LOC102622104), mRNA		Yes
TR54753|c1_g2_i3	.	2.47492	.	0.00719415	GO:0003674,GO:0005488,GO:0005515	PREDICTED: Citrus sinensis vacuolar protein sorting-associated protein 41 homolog (LOC102622104), mRNA		Yes
TR49781|c0_g1_i10	2.48852	.	0.0104173	.		Citrus clementina hypothetical protein (CICLE_v10024920mg) mRNA, complete cds
TR49781|c0_g1_i2	.	-2.21108	.	0.0254755		Citrus clementina hypothetical protein (CICLE_v10024920mg) mRNA, complete cds
TR48137|c0_g1_i18	-3.48291	.	2.04036e-06	.		PREDICTED: Citrus sinensis RNA pseudouridine synthase 6, chloroplastic-like (LOC102615929), transcript variant X1, mRNA		Yes	Yes
TR48137|c0_g1_i32	-2.2858	.	0.0289051	.		PREDICTED: Citrus sinensis RNA pseudouridine synthase 6, chloroplastic-like (LOC102615929), transcript variant X1, mRNA		Yes	Yes
TR48137|c0_g1_i1	.	2.89785	.	0.000852274	GO:0001522,GO:0003674,GO:0003676,GO:0003723,GO:0003824,GO:0005488,GO:0006139,GO:0006725,GO:0006807,GO:0008150,GO:0008152,GO:0009451,GO:0009982,GO:0009987,GO:0016070,GO:0016853,GO:0016866,GO:0034641,GO:0043170,GO:0043412,GO:0044237,GO:0044238,GO:0044260,GO:0046483,GO:0071704,GO:0090304,GO:0097159,GO:1901360,GO:1901363	Citrus clementina hypothetical protein (CICLE_v10015055mg) mRNA, complete cds
TR53525|c5_g1_i2	2.47486	2.32228	0.00131666	4.97603e-06	GO:0003674,GO:0005488,GO:0005515	PREDICTED: Citrus sinensis ankyrin-1-like (LOC102622244), mRNA	Yes	Yes
TR53525|c5_g1_i3	2.15845	2.37601	0.00489461	2.3051e-07		PREDICTED: Citrus sinensis ankyrin-1-like (LOC102622244), mRNA		Yes
TR53525|c5_g1_i1	.	2.05012	.	3.11563e-07		PREDICTED: Citrus sinensis ankyrin-1-like (LOC102622244), mRNA		Yes
TR47220|c0_g1_i11	-1.77284	-1.65715	3.41216e-06	0.000136411		Citrus clementina hypothetical protein (CICLE_v10004446mg) mRNA, complete cds
TR54855|c5_g7_i3	3.28347	.	1.44794e-05	.	GO:0000166,GO:0001882,GO:0001883,GO:0003674,GO:0003824,GO:0004672,GO:0005488,GO:0005524,GO:0006464,GO:0006468,GO:0006793,GO:0006796,GO:0008150,GO:0008152,GO:0009987,GO:0016301,GO:0016310,GO:0016740,GO:0016772,GO:0016773,GO:0017076,GO:0019538,GO:0030554,GO:0032549,GO:0032550,GO:0032553,GO:0032555,GO:0032559,GO:0035639,GO:0036094,GO:0036211,GO:0043167,GO:0043168,GO:0043170,GO:0043412,GO:0044237,GO:…	PREDICTED: Citrus sinensis putative receptor-like protein kinase At3g47110 (LOC102620588), mRNA	Yes	Yes
TR54855|c5_g7_i8	.	1.20229	.	0.04647	GO:0000166,GO:0001882,GO:0001883,GO:0003674,GO:0003824,GO:0004672,GO:0005488,GO:0005524,GO:0006464,GO:0006468,GO:0006793,GO:0006796,GO:0008150,GO:0008152,GO:0009987,GO:0016301,GO:0016310,GO:0016740,GO:0016772,GO:0016773,GO:0017076,GO:0019538,GO:0030554,GO:0032549,GO:0032550,GO:0032553,GO:0032555,GO:0032559,GO:0035639,GO:0036094,GO:0036211,GO:0043167,GO:0043168,GO:0043170,GO:0043412,GO:0044237,GO:…	PREDICTED: Citrus sinensis probable LRR receptor-like serine/threonine-protein kinase At3g47570 (LOC102621710), mRNA		Yes
TR52978|c1_g1_i7	1.35131	1.29098	0.000891959	0.025175		Citrus clementina hypothetical protein (CICLE_v10024985mg) mRNA, complete cds
TR52978|c1_g1_i10	1.15098	1.37253	0.0238213	0.00054688		Citrus clementina hypothetical protein (CICLE_v10024985mg) mRNA, complete cds
TR52978|c1_g1_i2	.	2.77177	.	0.00166483		Citrus clementina hypothetical protein (CICLE_v10024985mg) mRNA, complete cds
TR52978|c1_g1_i1	.	2.37235	.	0.0166451		Citrus clementina hypothetical protein (CICLE_v10024985mg) mRNA, complete cds
TR53461|c0_g1_i3	-1.40522	.	0.00112967	.		PREDICTED: Citrus sinensis protein REVEILLE 1 (LOC102630458), mRNA
TR53461|c0_g1_i8	.	-2.59772	.	0.00545131		PREDICTED: Citrus sinensis protein REVEILLE 1 (LOC102630458), mRNA

## Sheet: Table S4
Table S4. Biological process based characterisation of genes differentially expressed across both grapefruit varieties.
Level	GO ID	GO Name	GO Type	Parents (ACC)	Parents (Name)	Nodescore	#Seqs	Sequence Names
1	GO:0008150	biological_process	Biological Process			279.78	58	TR37626|c0_g1, TR43963|c1_g3, TR52124|c1_g1, TR47257|c2_g1, TR52044|c3_g5, TR51756|c3_g2, TR50743|c0_g1, TR41127|c0_g3, TR46659|c0_g1, TR28527|c0_g1, TR38468|c0_g1, TR52301|c0_g1, TR36843|c0_g1, TR5918|c0_g1, TR54295|c0_g1, TR48137|c0_g1, TR54866|c8_g1, TR64949|c0_g1, TR37165|c0_g1, TR52145|c1_g2, TR51523|c0_g2, TR51156|c1_g1, TR51268|c0_g2, TR54855|c5_g7, TR44281|c0_g1, TR52702|c1_g1, TR35803|c0…
2	GO:0008152	metabolic process	Biological Process	GO:0008150	biological_process	226.93	45	TR52702|c1_g1, TR35803|c0_g1, TR43963|c1_g3, TR13193|c3_g1, TR40281|c0_g1, TR53981|c0_g1, TR54753|c1_g2, TR49183|c0_g2, TR48920|c0_g1, TR52124|c1_g1, TR52044|c3_g5, TR47257|c2_g1, TR50509|c0_g1, TR10909|c0_g1, TR47293|c0_g1, TR41127|c0_g3, TR45707|c0_g1, TR41925|c0_g1, TR29545|c0_g1, TR49150|c0_g1, TR47496|c1_g1, TR46659|c0_g1, TR47115|c0_g1, TR38468|c0_g1, TR47816|c0_g1, TR52975|c0_g1, TR5918|c0…
2	GO:0009987	cellular process	Biological Process	GO:0008150	biological_process	123.86	33	TR52702|c1_g1, TR37626|c0_g1, TR13193|c3_g1, TR53981|c0_g1, TR49183|c0_g2, TR48920|c0_g1, TR50743|c0_g1, TR51756|c3_g2, TR47293|c0_g1, TR10909|c0_g1, TR29545|c0_g1, TR49186|c0_g1, TR47496|c1_g1, TR53335|c0_g1, TR28527|c0_g1, TR38468|c0_g1, TR47816|c0_g1, TR52301|c0_g1, TR5918|c0_g1, TR48838|c2_g1, TR54295|c0_g1, TR48137|c0_g1, TR45458|c0_g1, TR48391|c0_g1, TR54866|c8_g1, TR51523|c0_g2, TR54855|c5…
2	GO:0044699	single-organism process	Biological Process	GO:0008150	biological_process	70.83	29	TR52702|c1_g1, TR37626|c0_g1, TR13193|c3_g1, TR40281|c0_g1, TR49183|c0_g2, TR52124|c1_g1, TR47257|c2_g1, TR50743|c0_g1, TR51756|c3_g2, TR45707|c0_g1, TR41925|c0_g1, TR49186|c0_g1, TR46659|c0_g1, TR53335|c0_g1, TR28527|c0_g1, TR47816|c0_g1, TR52301|c0_g1, TR51076|c1_g1, TR47257|c1_g2, TR48391|c0_g1, TR54866|c8_g1, TR64949|c0_g1, TR52145|c1_g2, TR51156|c1_g1, TR51268|c0_g2, TR53096|c0_g1, TR50760|c…
2	GO:0050789	regulation of biological process	Biological Process	GO:0065007, GO:0008150	biological regulation, biological_process	38.57	10	TR37626|c0_g1, TR48838|c2_g1, TR50743|c0_g1, TR10909|c0_g1, TR45458|c0_g1, TR54866|c8_g1, TR50760|c0_g2, TR52301|c0_g1, TR29545|c0_g1, TR5918|c0_g1
2	GO:0065007	biological regulation	Biological Process	GO:0008150	biological_process	33.14	10	TR37626|c0_g1, TR48838|c2_g1, TR50743|c0_g1, TR10909|c0_g1, TR45458|c0_g1, TR54866|c8_g1, TR50760|c0_g2, TR52301|c0_g1, TR29545|c0_g1, TR5918|c0_g1
2	GO:0051179	localization	Biological Process	GO:0008150	biological_process	32.44	9	TR53335|c0_g1, TR54753|c1_g2, TR28527|c0_g1, TR51756|c3_g2, TR48391|c0_g1, TR50795|c0_g2, TR51174|c1_g1, TR49186|c0_g1, TR36843|c0_g1
2	GO:0050896	response to stimulus	Biological Process	GO:0008150	biological_process	2.84	5	TR37626|c0_g1, TR50743|c0_g1, TR54866|c8_g1, TR50760|c0_g2, TR52301|c0_g1
2	GO:0023052	signaling	Biological Process	GO:0008150	biological_process	2.84	5	TR37626|c0_g1, TR50743|c0_g1, TR54866|c8_g1, TR50760|c0_g2, TR52301|c0_g1
3	GO:0071704	organic substance metabolic process	Biological Process	GO:0008152	metabolic process	118.79	26	TR52702|c1_g1, TR43963|c1_g3, TR13193|c3_g1, TR53981|c0_g1, TR54753|c1_g2, TR49183|c0_g2, TR48920|c0_g1, TR52124|c1_g1, TR52044|c3_g5, TR47293|c0_g1, TR10909|c0_g1, TR41127|c0_g3, TR29545|c0_g1, TR47496|c1_g1, TR46659|c0_g1, TR38468|c0_g1, TR47816|c0_g1, TR5918|c0_g1, TR48838|c2_g1, TR54295|c0_g1, TR48137|c0_g1, TR45458|c0_g1, TR54855|c5_g7, TR41412|c0_g5, TR52757|c1_g1, TR36476|c0_g1
3	GO:0044238	primary metabolic process	Biological Process	GO:0008152	metabolic process	76.64	26	TR52702|c1_g1, TR43963|c1_g3, TR13193|c3_g1, TR53981|c0_g1, TR54753|c1_g2, TR49183|c0_g2, TR48920|c0_g1, TR52124|c1_g1, TR52044|c3_g5, TR10909|c0_g1, TR47293|c0_g1, TR41127|c0_g3, TR29545|c0_g1, TR46659|c0_g1, TR47496|c1_g1, TR38468|c0_g1, TR47816|c0_g1, TR5918|c0_g1, TR48838|c2_g1, TR54295|c0_g1, TR45458|c0_g1, TR48137|c0_g1, TR54855|c5_g7, TR41412|c0_g5, TR52757|c1_g1, TR36476|c0_g1
3	GO:0044237	cellular metabolic process	Biological Process	GO:0008152, GO:0009987	metabolic process, cellular process	114.75	21	TR52702|c1_g1, TR13193|c3_g1, TR53981|c0_g1, TR49183|c0_g2, TR48920|c0_g1, TR48838|c2_g1, TR54295|c0_g1, TR47293|c0_g1, TR10909|c0_g1, TR48137|c0_g1, TR45458|c0_g1, TR29545|c0_g1, TR51523|c0_g2, TR47496|c1_g1, TR54855|c5_g7, TR38468|c0_g1, TR47816|c0_g1, TR41412|c0_g5, TR52757|c1_g1, TR36476|c0_g1, TR5918|c0_g1
3	GO:0044763	single-organism cellular process	Biological Process	GO:0009987, GO:0044699	cellular process, single-organism process	25.07	16	TR52702|c1_g1, TR37626|c0_g1, TR13193|c3_g1, TR49183|c0_g2, TR50743|c0_g1, TR51756|c3_g2, TR48391|c0_g1, TR54866|c8_g1, TR49186|c0_g1, TR53335|c0_g1, TR28527|c0_g1, TR47816|c0_g1, TR50760|c0_g2, TR52301|c0_g1, TR50795|c0_g2, TR51174|c1_g1
3	GO:0044710	single-organism metabolic process	Biological Process	GO:0008152, GO:0044699	metabolic process, single-organism process	32.77	15	TR52702|c1_g1, TR51076|c1_g1, TR40281|c0_g1, TR47257|c1_g2, TR49183|c0_g2, TR52124|c1_g1, TR47257|c2_g1, TR45707|c0_g1, TR64949|c0_g1, TR41925|c0_g1, TR52145|c1_g2, TR51156|c1_g1, TR51268|c0_g2, TR46659|c0_g1, TR53096|c0_g1
3	GO:0006807	nitrogen compound metabolic process	Biological Process	GO:0008152	metabolic process	41.06	11	TR52702|c1_g1, TR13193|c3_g1, TR53981|c0_g1, TR54295|c0_g1, TR48838|c2_g1, TR38468|c0_g1, TR10909|c0_g1, TR48137|c0_g1, TR45458|c0_g1, TR29545|c0_g1, TR5918|c0_g1
3	GO:0050794	regulation of cellular process	Biological Process	GO:0009987, GO:0050789	cellular process, regulation of biological process	25.86	10	TR37626|c0_g1, TR48838|c2_g1, TR50743|c0_g1, TR10909|c0_g1, TR45458|c0_g1, TR54866|c8_g1, TR50760|c0_g2, TR52301|c0_g1, TR29545|c0_g1, TR5918|c0_g1
3	GO:0051234	establishment of localization	Biological Process	GO:0051179	localization	26.42	9	TR53335|c0_g1, TR54753|c1_g2, TR28527|c0_g1, TR51756|c3_g2, TR48391|c0_g1, TR50795|c0_g2, TR51174|c1_g1, TR49186|c0_g1, TR36843|c0_g1
3	GO:0009058	biosynthetic process	Biological Process	GO:0008152	metabolic process	50.28	9	TR13193|c3_g1, TR48838|c2_g1, TR54295|c0_g1, TR38468|c0_g1, TR10909|c0_g1, TR45458|c0_g1, TR37165|c0_g1, TR29545|c0_g1, TR5918|c0_g1
3	GO:1902578	single-organism localization	Biological Process	GO:0051179, GO:0044699	localization, single-organism process	11.2	7	TR53335|c0_g1, TR28527|c0_g1, TR51756|c3_g2, TR48391|c0_g1, TR50795|c0_g2, TR51174|c1_g1, TR49186|c0_g1
3	GO:0044700	single organism signaling	Biological Process	GO:0044699, GO:0023052	single-organism process, signaling	4.73	5	TR37626|c0_g1, TR50743|c0_g1, TR54866|c8_g1, TR50760|c0_g2, TR52301|c0_g1
3	GO:0051716	cellular response to stimulus	Biological Process	GO:0050896, GO:0009987	response to stimulus, cellular process	4.73	5	TR37626|c0_g1, TR50743|c0_g1, TR54866|c8_g1, TR50760|c0_g2, TR52301|c0_g1
3	GO:0019222	regulation of metabolic process	Biological Process	GO:0008152, GO:0050789	metabolic process, regulation of biological process	32.89	5	TR48838|c2_g1, TR10909|c0_g1, TR45458|c0_g1, TR29545|c0_g1, TR5918|c0_g1
4	GO:0043170	macromolecule metabolic process	Biological Process	GO:0071704	organic substance metabolic process	98.4	21	TR43963|c1_g3, TR13193|c3_g1, TR53981|c0_g1, TR54753|c1_g2, TR48920|c0_g1, TR54295|c0_g1, TR48838|c2_g1, TR47293|c0_g1, TR10909|c0_g1, TR48137|c0_g1, TR45458|c0_g1, TR41127|c0_g3, TR29545|c0_g1, TR47496|c1_g1, TR54855|c5_g7, TR38468|c0_g1, TR47816|c0_g1, TR41412|c0_g5, TR5918|c0_g1, TR52757|c1_g1, TR36476|c0_g1
4	GO:0044260	cellular macromolecule metabolic process	Biological Process	GO:0044237, GO:0043170	cellular metabolic process, macromolecule metabolic process	58.83	18	TR13193|c3_g1, TR53981|c0_g1, TR48920|c0_g1, TR54295|c0_g1, TR48838|c2_g1, TR47293|c0_g1, TR10909|c0_g1, TR48137|c0_g1, TR45458|c0_g1, TR29545|c0_g1, TR47496|c1_g1, TR54855|c5_g7, TR38468|c0_g1, TR47816|c0_g1, TR41412|c0_g5, TR5918|c0_g1, TR52757|c1_g1, TR36476|c0_g1
4	GO:0055114	oxidation-reduction process	Biological Process	GO:0044710	single-organism metabolic process	13	13	TR52702|c1_g1, TR51076|c1_g1, TR40281|c0_g1, TR47257|c1_g2, TR49183|c0_g2, TR47257|c2_g1, TR45707|c0_g1, TR64949|c0_g1, TR41925|c0_g1, TR52145|c1_g2, TR51156|c1_g1, TR51268|c0_g2, TR53096|c0_g1
4	GO:1901360	organic cyclic compound metabolic process	Biological Process	GO:0071704	organic substance metabolic process	37.66	10	TR13193|c3_g1, TR53981|c0_g1, TR54295|c0_g1, TR48838|c2_g1, TR38468|c0_g1, TR10909|c0_g1, TR48137|c0_g1, TR45458|c0_g1, TR29545|c0_g1, TR5918|c0_g1
4	GO:0019538	protein metabolic process	Biological Process	GO:0044238, GO:0043170	primary metabolic process, macromolecule metabolic process	26.79	10	TR47496|c1_g1, TR54855|c5_g7, TR54753|c1_g2, TR48920|c0_g1, TR47293|c0_g1, TR47816|c0_g1, TR41127|c0_g3, TR41412|c0_g5, TR52757|c1_g1, TR36476|c0_g1
4	GO:0046483	heterocycle metabolic process	Biological Process	GO:0044237	cellular metabolic process	37.66	10	TR13193|c3_g1, TR53981|c0_g1, TR54295|c0_g1, TR48838|c2_g1, TR38468|c0_g1, TR10909|c0_g1, TR48137|c0_g1, TR45458|c0_g1, TR29545|c0_g1, TR5918|c0_g1
4	GO:0006139	nucleobase-containing compound metabolic process	Biological Process	GO:0046483, GO:1901360, GO:0044238, GO:0006725, GO:0034641	heterocycle metabolic process, organic cyclic compound metabolic process, primary metabolic process, cellular aromatic compound metabolic process, cellular nitrogen compound metabolic process	39.09	10	TR13193|c3_g1, TR53981|c0_g1, TR48838|c2_g1, TR54295|c0_g1, TR38468|c0_g1, TR10909|c0_g1, TR48137|c0_g1, TR45458|c0_g1, TR29545|c0_g1, TR5918|c0_g1
4	GO:0006725	cellular aromatic compound metabolic process	Biological Process	GO:0044237	cellular metabolic process	37.66	10	TR13193|c3_g1, TR53981|c0_g1, TR54295|c0_g1, TR48838|c2_g1, TR38468|c0_g1, TR10909|c0_g1, TR48137|c0_g1, TR45458|c0_g1, TR29545|c0_g1, TR5918|c0_g1
4	GO:0034641	cellular nitrogen compound metabolic process	Biological Process	GO:0044237, GO:0006807	cellular metabolic process, nitrogen compound metabolic process	37.66	10	TR13193|c3_g1, TR53981|c0_g1, TR54295|c0_g1, TR48838|c2_g1, TR38468|c0_g1, TR10909|c0_g1, TR48137|c0_g1, TR45458|c0_g1, TR29545|c0_g1, TR5918|c0_g1
4	GO:0006810	transport	Biological Process	GO:0051234	establishment of localization	24.56	9	TR53335|c0_g1, TR54753|c1_g2, TR28527|c0_g1, TR51756|c3_g2, TR48391|c0_g1, TR50795|c0_g2, TR51174|c1_g1, TR49186|c0_g1, TR36843|c0_g1
4	GO:0044249	cellular biosynthetic process	Biological Process	GO:0044237, GO:0009058	cellular metabolic process, biosynthetic process	42.2	8	TR13193|c3_g1, TR54295|c0_g1, TR48838|c2_g1, TR38468|c0_g1, TR10909|c0_g1, TR45458|c0_g1, TR29545|c0_g1, TR5918|c0_g1
4	GO:1901576	organic substance biosynthetic process	Biological Process	GO:0071704, GO:0009058	organic substance metabolic process, biosynthetic process	33.63	8	TR13193|c3_g1, TR54295|c0_g1, TR48838|c2_g1, TR38468|c0_g1, TR10909|c0_g1, TR45458|c0_g1, TR29545|c0_g1, TR5918|c0_g1
4	GO:0044765	single-organism transport	Biological Process	GO:0006810, GO:1902578	transport, single-organism localization	7	7	TR53335|c0_g1, TR28527|c0_g1, TR51756|c3_g2, TR48391|c0_g1, TR50795|c0_g2, TR51174|c1_g1, TR49186|c0_g1
4	GO:0007154	cell communication	Biological Process	GO:0044763	single-organism cellular process	5.09	6	TR37626|c0_g1, TR50743|c0_g1, TR47816|c0_g1, TR54866|c8_g1, TR50760|c0_g2, TR52301|c0_g1
4	GO:0006793	phosphorus metabolic process	Biological Process	GO:0044237	cellular metabolic process	13.06	6	TR47496|c1_g1, TR54855|c5_g7, TR47816|c0_g1, TR41412|c0_g5, TR52757|c1_g1, TR36476|c0_g1
4	GO:0080090	regulation of primary metabolic process	Biological Process	GO:0019222, GO:0044238	regulation of metabolic process, primary metabolic process	11.92	5	TR48838|c2_g1, TR10909|c0_g1, TR45458|c0_g1, TR29545|c0_g1, TR5918|c0_g1
4	GO:0031323	regulation of cellular metabolic process	Biological Process	GO:0044237, GO:0019222, GO:0050794	cellular metabolic process, regulation of metabolic process, regulation of cellular process	18.56	5	TR48838|c2_g1, TR10909|c0_g1, TR45458|c0_g1, TR29545|c0_g1, TR5918|c0_g1
4	GO:0007165	signal transduction	Biological Process	GO:0051716, GO:0007154, GO:0050794, GO:0044700	cellular response to stimulus, cell communication, regulation of cellular process, single organism signaling	7.88	5	TR37626|c0_g1, TR50743|c0_g1, TR54866|c8_g1, TR50760|c0_g2, TR52301|c0_g1
4	GO:0060255	regulation of macromolecule metabolic process	Biological Process	GO:0019222, GO:0043170	regulation of metabolic process, macromolecule metabolic process	20.48	5	TR48838|c2_g1, TR10909|c0_g1, TR45458|c0_g1, TR29545|c0_g1, TR5918|c0_g1
4	GO:0009889	regulation of biosynthetic process	Biological Process	GO:0019222, GO:0009058	regulation of metabolic process, biosynthetic process	16.76	5	TR48838|c2_g1, TR10909|c0_g1, TR45458|c0_g1, TR29545|c0_g1, TR5918|c0_g1
4	GO:0051171	regulation of nitrogen compound metabolic process	Biological Process	GO:0019222, GO:0006807	regulation of metabolic process, nitrogen compound metabolic process	11.92	5	TR48838|c2_g1, TR10909|c0_g1, TR45458|c0_g1, TR29545|c0_g1, TR5918|c0_g1
5	GO:0043412	macromolecule modification	Biological Process	GO:0043170	macromolecule metabolic process	28.01	12	TR13193|c3_g1, TR53981|c0_g1, TR48920|c0_g1, TR47293|c0_g1, TR48137|c0_g1, TR47496|c1_g1, TR54855|c5_g7, TR38468|c0_g1, TR47816|c0_g1, TR41412|c0_g5, TR52757|c1_g1, TR36476|c0_g1
5	GO:0090304	nucleic acid metabolic process	Biological Process	GO:0006139, GO:0043170	nucleobase-containing compound metabolic process, macromolecule metabolic process	30.44	10	TR13193|c3_g1, TR53981|c0_g1, TR48838|c2_g1, TR54295|c0_g1, TR38468|c0_g1, TR10909|c0_g1, TR48137|c0_g1, TR45458|c0_g1, TR29545|c0_g1, TR5918|c0_g1
5	GO:0016070	RNA metabolic process	Biological Process	GO:0090304, GO:0044260	nucleic acid metabolic process, cellular macromolecule metabolic process	32.47	9	TR13193|c3_g1, TR53981|c0_g1, TR48838|c2_g1, TR38468|c0_g1, TR10909|c0_g1, TR48137|c0_g1, TR45458|c0_g1, TR29545|c0_g1, TR5918|c0_g1
5	GO:0009059	macromolecule biosynthetic process	Biological Process	GO:1901576, GO:0043170	organic substance biosynthetic process, macromolecule metabolic process	31.52	8	TR13193|c3_g1, TR48838|c2_g1, TR54295|c0_g1, TR38468|c0_g1, TR10909|c0_g1, TR45458|c0_g1, TR29545|c0_g1, TR5918|c0_g1
5	GO:0036211	protein modification process	Biological Process	GO:0019538, GO:0043412	protein metabolic process, macromolecule modification	16.37	8	TR47496|c1_g1, TR54855|c5_g7, TR48920|c0_g1, TR47293|c0_g1, TR47816|c0_g1, TR41412|c0_g5, TR52757|c1_g1, TR36476|c0_g1
5	GO:0034645	cellular macromolecule biosynthetic process	Biological Process	GO:0009059, GO:0044249, GO:0044260	macromolecule biosynthetic process, cellular biosynthetic process, cellular macromolecule metabolic process	17.96	8	TR13193|c3_g1, TR48838|c2_g1, TR54295|c0_g1, TR38468|c0_g1, TR10909|c0_g1, TR45458|c0_g1, TR29545|c0_g1, TR5918|c0_g1
5	GO:0044267	cellular protein metabolic process	Biological Process	GO:0019538, GO:0044260	protein metabolic process, cellular macromolecule metabolic process	16.37	8	TR47496|c1_g1, TR54855|c5_g7, TR48920|c0_g1, TR47293|c0_g1, TR47816|c0_g1, TR41412|c0_g5, TR52757|c1_g1, TR36476|c0_g1
5	GO:0010467	gene expression	Biological Process	GO:0043170	macromolecule metabolic process	10.56	7	TR13193|c3_g1, TR48838|c2_g1, TR38468|c0_g1, TR10909|c0_g1, TR45458|c0_g1, TR29545|c0_g1, TR5918|c0_g1
5	GO:0018130	heterocycle biosynthetic process	Biological Process	GO:0046483, GO:0044249	heterocycle metabolic process, cellular biosynthetic process	18.47	7	TR13193|c3_g1, TR48838|c2_g1, TR38468|c0_g1, TR10909|c0_g1, TR45458|c0_g1, TR29545|c0_g1, TR5918|c0_g1
5	GO:0034654	nucleobase-containing compound biosynthetic process	Biological Process	GO:0044271, GO:1901362, GO:0006139, GO:0018130, GO:0019438	cellular nitrogen compound biosynthetic process, organic cyclic compound biosynthetic process, nucleobase-containing compound metabolic process, heterocycle biosynthetic process, aromatic compound biosynthetic process	19.12	7	TR13193|c3_g1, TR48838|c2_g1, TR38468|c0_g1, TR10909|c0_g1, TR45458|c0_g1, TR29545|c0_g1, TR5918|c0_g1
5	GO:0044271	cellular nitrogen compound biosynthetic process	Biological Process	GO:0044249, GO:0034641	cellular biosynthetic process, cellular nitrogen compound metabolic process	18.47	7	TR13193|c3_g1, TR48838|c2_g1, TR38468|c0_g1, TR10909|c0_g1, TR45458|c0_g1, TR29545|c0_g1, TR5918|c0_g1
5	GO:0055085	transmembrane transport	Biological Process	GO:0006810	transport	7	7	TR53335|c0_g1, TR28527|c0_g1, TR51756|c3_g2, TR48391|c0_g1, TR50795|c0_g2, TR51174|c1_g1, TR49186|c0_g1
5	GO:1901362	organic cyclic compound biosynthetic process	Biological Process	GO:1901576, GO:1901360	organic substance biosynthetic process, organic cyclic compound metabolic process	18.47	7	TR13193|c3_g1, TR48838|c2_g1, TR38468|c0_g1, TR10909|c0_g1, TR45458|c0_g1, TR29545|c0_g1, TR5918|c0_g1
5	GO:0019438	aromatic compound biosynthetic process	Biological Process	GO:0044249, GO:0006725	cellular biosynthetic process, cellular aromatic compound metabolic process	18.47	7	TR13193|c3_g1, TR48838|c2_g1, TR38468|c0_g1, TR10909|c0_g1, TR45458|c0_g1, TR29545|c0_g1, TR5918|c0_g1
5	GO:0006796	phosphate-containing compound metabolic process	Biological Process	GO:0006793	phosphorus metabolic process	11.76	6	TR47496|c1_g1, TR54855|c5_g7, TR47816|c0_g1, TR41412|c0_g5, TR52757|c1_g1, TR36476|c0_g1
5	GO:0019219	regulation of nucleobase-containing compound metabolic process	Biological Process	GO:0051171, GO:0080090, GO:0006139, GO:0031323	regulation of nitrogen compound metabolic process, regulation of primary metabolic process, nucleobase-containing compound metabolic process, regulation of cellular metabolic process	11.53	5	TR48838|c2_g1, TR10909|c0_g1, TR45458|c0_g1, TR29545|c0_g1, TR5918|c0_g1
5	GO:0010556	regulation of macromolecule biosynthetic process	Biological Process	GO:0009889, GO:0009059, GO:0060255	regulation of biosynthetic process, macromolecule biosynthetic process, regulation of macromolecule metabolic process	14.6	5	TR48838|c2_g1, TR10909|c0_g1, TR45458|c0_g1, TR29545|c0_g1, TR5918|c0_g1
5	GO:0010468	regulation of gene expression	Biological Process	GO:0060255, GO:0010467	regulation of macromolecule metabolic process, gene expression	8	5	TR48838|c2_g1, TR10909|c0_g1, TR45458|c0_g1, TR29545|c0_g1, TR5918|c0_g1
5	GO:0051252	regulation of RNA metabolic process	Biological Process	GO:0016070, GO:0060255, GO:0019219	RNA metabolic process, regulation of macromolecule metabolic process, regulation of nucleobase-containing compound metabolic process	10.88	5	TR48838|c2_g1, TR10909|c0_g1, TR45458|c0_g1, TR29545|c0_g1, TR5918|c0_g1
5	GO:0031326	regulation of cellular biosynthetic process	Biological Process	GO:0009889, GO:0044249, GO:0031323	regulation of biosynthetic process, cellular biosynthetic process, regulation of cellular metabolic process	14.6	5	TR48838|c2_g1, TR10909|c0_g1, TR45458|c0_g1, TR29545|c0_g1, TR5918|c0_g1
6	GO:0006464	cellular protein modification process	Biological Process	GO:0044267, GO:0036211	cellular protein metabolic process, protein modification process	13.95	8	TR47496|c1_g1, TR54855|c5_g7, TR48920|c0_g1, TR47293|c0_g1, TR47816|c0_g1, TR41412|c0_g5, TR52757|c1_g1, TR36476|c0_g1
6	GO:0006351	transcription, DNA-templated	Biological Process	GO:0097659, GO:0034645, GO:0010467	nucleic acid-templated transcription, cellular macromolecule biosynthetic process, gene expression	10.6	7	TR13193|c3_g1, TR48838|c2_g1, TR38468|c0_g1, TR10909|c0_g1, TR45458|c0_g1, TR29545|c0_g1, TR5918|c0_g1
6	GO:0032774	RNA biosynthetic process	Biological Process	GO:0016070, GO:0009059, GO:0034654	RNA metabolic process, macromolecule biosynthetic process, nucleobase-containing compound biosynthetic process	20.2	7	TR13193|c3_g1, TR48838|c2_g1, TR38468|c0_g1, TR10909|c0_g1, TR45458|c0_g1, TR29545|c0_g1, TR5918|c0_g1
6	GO:0016310	phosphorylation	Biological Process	GO:0006796	phosphate-containing compound metabolic process	9.6	6	TR47496|c1_g1, TR54855|c5_g7, TR47816|c0_g1, TR41412|c0_g5, TR52757|c1_g1, TR36476|c0_g1
6	GO:0006355	regulation of transcription, DNA-templated	Biological Process	GO:1903506, GO:0006351, GO:0010468, GO:2000112	regulation of nucleic acid-templated transcription, transcription, DNA-templated, regulation of gene expression, regulation of cellular macromolecule biosynthetic process	5	5	TR48838|c2_g1, TR10909|c0_g1, TR45458|c0_g1, TR29545|c0_g1, TR5918|c0_g1
6	GO:2000112	regulation of cellular macromolecule biosynthetic process	Biological Process	GO:0010556, GO:0031326, GO:0034645	regulation of macromolecule biosynthetic process, regulation of cellular biosynthetic process, cellular macromolecule biosynthetic process	8	5	TR48838|c2_g1, TR10909|c0_g1, TR45458|c0_g1, TR29545|c0_g1, TR5918|c0_g1
6	GO:2001141	regulation of RNA biosynthetic process	Biological Process	GO:0010556, GO:0031326, GO:0032774, GO:0051252	regulation of macromolecule biosynthetic process, regulation of cellular biosynthetic process, RNA biosynthetic process, regulation of RNA metabolic process	9.8	5	TR48838|c2_g1, TR10909|c0_g1, TR45458|c0_g1, TR29545|c0_g1, TR5918|c0_g1
7	GO:0097659	nucleic acid-templated transcription	Biological Process	GO:0032774	RNA biosynthetic process	16.36	7	TR13193|c3_g1, TR48838|c2_g1, TR38468|c0_g1, TR10909|c0_g1, TR45458|c0_g1, TR29545|c0_g1, TR5918|c0_g1
7	GO:0006468	protein phosphorylation	Biological Process	GO:0006464, GO:0016310	cellular protein modification process, phosphorylation	6	6	TR47496|c1_g1, TR54855|c5_g7, TR47816|c0_g1, TR41412|c0_g5, TR52757|c1_g1, TR36476|c0_g1
7	GO:1903506	regulation of nucleic acid-templated transcription	Biological Process	GO:0097659, GO:2001141	nucleic acid-templated transcription, regulation of RNA biosynthetic process	8	5	TR48838|c2_g1, TR10909|c0_g1, TR45458|c0_g1, TR29545|c0_g1, TR5918|c0_g1

## Sheet: Table S5
Table S5. Molecular funtion based characterisation of genes differentially expressed across both grapefruit varieties.
Level	GO ID	GO Name	GO Type	Parents (ACC)	Parents (Name)	Nodescore	#Seqs	Sequence Names
1	GO:0003674	molecular_function	Molecular Function			287.35	82	TR52305|c0_g3, TR37626|c0_g1, TR43963|c1_g3, TR52044|c3_g5, TR52124|c1_g1, TR47257|c2_g1, TR41127|c0_g3, TR54249|c2_g2, TR28527|c0_g1, TR54613|c1_g21, TR38468|c0_g1, TR52301|c0_g1, TR36843|c0_g1, TR5918|c0_g1, TR41122|c1_g1, TR53525|c5_g1, TR48235|c0_g1, TR54295|c0_g1, TR74563|c0_g1, TR48137|c0_g1, TR54866|c8_g1, TR54638|c4_g4, TR37165|c0_g1, TR64949|c0_g1, TR52145|c1_g2, TR51523|c0_g2, TR54866|c…
2	GO:0005488	binding	Molecular Function	GO:0003674	molecular_function	206.3	57	TR52305|c0_g3, TR37626|c0_g1, TR52124|c1_g1, TR41127|c0_g3, TR54249|c2_g2, TR38468|c0_g1, TR52301|c0_g1, TR5918|c0_g1, TR36843|c0_g1, TR41122|c1_g1, TR53525|c5_g1, TR54295|c0_g1, TR74563|c0_g1, TR48137|c0_g1, TR54866|c8_g1, TR54638|c4_g4, TR52145|c1_g2, TR51523|c0_g2, TR54866|c8_g4, TR51156|c1_g1, TR54866|c8_g5, TR51268|c0_g2, TR53066|c0_g2, TR54855|c5_g7, TR44281|c0_g1, TR53220|c1_g1, TR45103|c0…
2	GO:0003824	catalytic activity	Molecular Function	GO:0003674	molecular_function	113.09	50	TR43963|c1_g3, TR52044|c3_g5, TR52124|c1_g1, TR47257|c2_g1, TR41127|c0_g3, TR54249|c2_g2, TR54613|c1_g21, TR38468|c0_g1, TR52301|c0_g1, TR48235|c0_g1, TR54295|c0_g1, TR48137|c0_g1, TR37165|c0_g1, TR64949|c0_g1, TR52145|c1_g2, TR51268|c0_g2, TR53066|c0_g2, TR54855|c5_g7, TR44281|c0_g1, TR38276|c0_g1, TR52702|c1_g1, TR35803|c0_g1, TR13193|c3_g1, TR40281|c0_g1, TR54753|c1_g2, TR53981|c0_g1, TR48920|…
3	GO:0043167	ion binding	Molecular Function	GO:0005488	binding	51.98	27	TR13193|c3_g1, TR40281|c0_g1, TR49183|c0_g2, TR52124|c1_g1, TR47968|c0_g1, TR47293|c0_g1, TR41925|c0_g1, TR49186|c0_g1, TR49150|c0_g1, TR47496|c1_g1, TR54249|c2_g2, TR38468|c0_g1, TR47816|c0_g1, TR36843|c0_g1, TR51076|c1_g1, TR54866|c8_g1, TR52145|c1_g2, TR51523|c0_g2, TR48608|c0_g1, TR51268|c0_g2, TR53066|c0_g2, TR54855|c5_g7, TR45253|c0_g1, TR54433|c0_g1, TR50795|c0_g2, TR52757|c1_g1, TR36476|c…
3	GO:1901363	heterocyclic compound binding	Molecular Function	GO:0005488	binding	88.46	25	TR40281|c0_g1, TR13193|c3_g1, TR53981|c0_g1, TR47968|c0_g1, TR10909|c0_g1, TR41925|c0_g1, TR47496|c1_g1, TR38468|c0_g1, TR47816|c0_g1, TR5918|c0_g1, TR51076|c1_g1, TR48838|c2_g1, TR54295|c0_g1, TR45458|c0_g1, TR48137|c0_g1, TR54866|c8_g1, TR52145|c1_g2, TR48608|c0_g1, TR51156|c1_g1, TR51268|c0_g2, TR54855|c5_g7, TR54433|c0_g1, TR50795|c0_g2, TR52757|c1_g1, TR36476|c0_g1
3	GO:0097159	organic cyclic compound binding	Molecular Function	GO:0005488	binding	88.46	25	TR40281|c0_g1, TR13193|c3_g1, TR53981|c0_g1, TR47968|c0_g1, TR10909|c0_g1, TR41925|c0_g1, TR47496|c1_g1, TR38468|c0_g1, TR47816|c0_g1, TR5918|c0_g1, TR51076|c1_g1, TR48838|c2_g1, TR54295|c0_g1, TR45458|c0_g1, TR48137|c0_g1, TR54866|c8_g1, TR52145|c1_g2, TR48608|c0_g1, TR51156|c1_g1, TR51268|c0_g2, TR54855|c5_g7, TR54433|c0_g1, TR50795|c0_g2, TR52757|c1_g1, TR36476|c0_g1
3	GO:0005515	protein binding	Molecular Function	GO:0005488	binding	22	22	TR52305|c0_g3, TR37626|c0_g1, TR41122|c1_g1, TR53525|c5_g1, TR54753|c1_g2, TR37208|c0_g3, TR74563|c0_g1, TR54866|c8_g1, TR41127|c0_g3, TR54638|c4_g4, TR54866|c8_g4, TR46616|c1_g1, TR54866|c8_g5, TR51258|c0_g1, TR53220|c1_g1, TR45103|c0_g2, TR54855|c3_g1, TR51844|c0_g1, TR50760|c0_g2, TR52301|c0_g1, TR36476|c0_g1, TR36843|c0_g1
3	GO:0016740	transferase activity	Molecular Function	GO:0003824	catalytic activity	44.43	18	TR35803|c0_g1, TR13193|c3_g1, TR54399|c1_g2, TR48920|c0_g1, TR54295|c0_g1, TR52044|c3_g5, TR51678|c4_g1, TR50509|c0_g1, TR47496|c1_g1, TR54855|c5_g7, TR38468|c0_g1, TR38276|c0_g1, TR47816|c0_g1, TR52301|c0_g1, TR41412|c0_g5, TR52975|c0_g1, TR52757|c1_g1, TR36476|c0_g1
3	GO:0036094	small molecule binding	Molecular Function	GO:0005488	binding	65.54	17	TR51076|c1_g1, TR40281|c0_g1, TR13193|c3_g1, TR54295|c0_g1, TR47968|c0_g1, TR54866|c8_g1, TR48608|c0_g1, TR51156|c1_g1, TR47496|c1_g1, TR51268|c0_g2, TR54855|c5_g7, TR38468|c0_g1, TR47816|c0_g1, TR54433|c0_g1, TR50795|c0_g2, TR52757|c1_g1, TR36476|c0_g1
3	GO:0097367	carbohydrate derivative binding	Molecular Function	GO:0005488	binding	47.7	13	TR13193|c3_g1, TR54295|c0_g1, TR47968|c0_g1, TR54866|c8_g1, TR48608|c0_g1, TR47496|c1_g1, TR54855|c5_g7, TR38468|c0_g1, TR47816|c0_g1, TR54433|c0_g1, TR50795|c0_g2, TR52757|c1_g1, TR36476|c0_g1
3	GO:0016491	oxidoreductase activity	Molecular Function	GO:0003824	catalytic activity	22.84	13	TR52702|c1_g1, TR51076|c1_g1, TR40281|c0_g1, TR47257|c1_g2, TR49183|c0_g2, TR47257|c2_g1, TR45707|c0_g1, TR41925|c0_g1, TR64949|c0_g1, TR52145|c1_g2, TR51268|c0_g2, TR54613|c1_g21, TR53096|c0_g1
3	GO:0016787	hydrolase activity	Molecular Function	GO:0003824	catalytic activity	29.61	13	TR43963|c1_g3, TR54753|c1_g2, TR52124|c1_g1, TR54295|c0_g1, TR47293|c0_g1, TR41127|c0_g3, TR48608|c0_g1, TR53066|c0_g2, TR54249|c2_g2, TR50384|c0_g1, TR54433|c0_g1, TR50795|c0_g2, TR41858|c0_g1
4	GO:0000166	nucleotide binding	Molecular Function	GO:1901265, GO:0036094	nucleoside phosphate binding, small molecule binding	48.15	17	TR51076|c1_g1, TR40281|c0_g1, TR13193|c3_g1, TR54295|c0_g1, TR47968|c0_g1, TR54866|c8_g1, TR48608|c0_g1, TR51156|c1_g1, TR47496|c1_g1, TR51268|c0_g2, TR54855|c5_g7, TR38468|c0_g1, TR47816|c0_g1, TR54433|c0_g1, TR50795|c0_g2, TR52757|c1_g1, TR36476|c0_g1
4	GO:1901265	nucleoside phosphate binding	Molecular Function	GO:1901363, GO:0097159	heterocyclic compound binding, organic cyclic compound binding	55.59	17	TR51076|c1_g1, TR40281|c0_g1, TR13193|c3_g1, TR54295|c0_g1, TR47968|c0_g1, TR54866|c8_g1, TR48608|c0_g1, TR51156|c1_g1, TR47496|c1_g1, TR51268|c0_g2, TR54855|c5_g7, TR38468|c0_g1, TR47816|c0_g1, TR54433|c0_g1, TR50795|c0_g2, TR52757|c1_g1, TR36476|c0_g1
4	GO:0043168	anion binding	Molecular Function	GO:0043167	ion binding	15	15	TR51076|c1_g1, TR13193|c3_g1, TR40281|c0_g1, TR47968|c0_g1, TR54866|c8_g1, TR48608|c0_g1, TR47496|c1_g1, TR51268|c0_g2, TR54855|c5_g7, TR38468|c0_g1, TR47816|c0_g1, TR54433|c0_g1, TR50795|c0_g2, TR52757|c1_g1, TR36476|c0_g1
4	GO:0001882	nucleoside binding	Molecular Function	GO:0097367, GO:1901363, GO:0036094, GO:0097159	carbohydrate derivative binding, heterocyclic compound binding, small molecule binding, organic cyclic compound binding	34.31	13	TR13193|c3_g1, TR54295|c0_g1, TR47968|c0_g1, TR54866|c8_g1, TR48608|c0_g1, TR47496|c1_g1, TR54855|c5_g7, TR38468|c0_g1, TR47816|c0_g1, TR54433|c0_g1, TR50795|c0_g2, TR52757|c1_g1, TR36476|c0_g1
4	GO:0043169	cation binding	Molecular Function	GO:0043167	ion binding	26.63	13	TR49183|c0_g2, TR52124|c1_g1, TR47293|c0_g1, TR41925|c0_g1, TR52145|c1_g2, TR49186|c0_g1, TR51523|c0_g2, TR49150|c0_g1, TR53066|c0_g2, TR54249|c2_g2, TR45253|c0_g1, TR36843|c0_g1, TR52757|c1_g1
4	GO:0032553	ribonucleotide binding	Molecular Function	GO:0097367, GO:0000166	carbohydrate derivative binding, nucleotide binding	26.11	12	TR13193|c3_g1, TR47968|c0_g1, TR54866|c8_g1, TR48608|c0_g1, TR47496|c1_g1, TR54855|c5_g7, TR38468|c0_g1, TR47816|c0_g1, TR54433|c0_g1, TR50795|c0_g2, TR52757|c1_g1, TR36476|c0_g1
4	GO:0016772	transferase activity, transferring phosphorus-containing groups	Molecular Function	GO:0016740	transferase activity	27.8	11	TR47496|c1_g1, TR13193|c3_g1, TR54399|c1_g2, TR54855|c5_g7, TR54295|c0_g1, TR38468|c0_g1, TR47816|c0_g1, TR52301|c0_g1, TR41412|c0_g5, TR52757|c1_g1, TR36476|c0_g1
4	GO:0003676	nucleic acid binding	Molecular Function	GO:1901363, GO:0097159	heterocyclic compound binding, organic cyclic compound binding	15.12	9	TR13193|c3_g1, TR53981|c0_g1, TR48838|c2_g1, TR54295|c0_g1, TR38468|c0_g1, TR10909|c0_g1, TR45458|c0_g1, TR48137|c0_g1, TR5918|c0_g1
5	GO:0046872	metal ion binding	Molecular Function	GO:0043169	cation binding	22.72	13	TR49183|c0_g2, TR52124|c1_g1, TR47293|c0_g1, TR41925|c0_g1, TR52145|c1_g2, TR49186|c0_g1, TR51523|c0_g2, TR49150|c0_g1, TR53066|c0_g2, TR54249|c2_g2, TR45253|c0_g1, TR36843|c0_g1, TR52757|c1_g1
5	GO:0032555	purine ribonucleotide binding	Molecular Function	GO:0017076, GO:0032553	purine nucleotide binding, ribonucleotide binding	23.52	12	TR13193|c3_g1, TR47968|c0_g1, TR54866|c8_g1, TR48608|c0_g1, TR47496|c1_g1, TR54855|c5_g7, TR38468|c0_g1, TR47816|c0_g1, TR54433|c0_g1, TR50795|c0_g2, TR52757|c1_g1, TR36476|c0_g1
5	GO:0032549	ribonucleoside binding	Molecular Function	GO:0001882	nucleoside binding	23.52	12	TR13193|c3_g1, TR47968|c0_g1, TR54866|c8_g1, TR48608|c0_g1, TR47496|c1_g1, TR54855|c5_g7, TR38468|c0_g1, TR47816|c0_g1, TR54433|c0_g1, TR50795|c0_g2, TR52757|c1_g1, TR36476|c0_g1
5	GO:0001883	purine nucleoside binding	Molecular Function	GO:0001882	nucleoside binding	23.52	12	TR13193|c3_g1, TR47968|c0_g1, TR54866|c8_g1, TR48608|c0_g1, TR47496|c1_g1, TR54855|c5_g7, TR38468|c0_g1, TR47816|c0_g1, TR54433|c0_g1, TR50795|c0_g2, TR52757|c1_g1, TR36476|c0_g1
5	GO:0017076	purine nucleotide binding	Molecular Function	GO:0000166	nucleotide binding	33.31	12	TR13193|c3_g1, TR47968|c0_g1, TR54866|c8_g1, TR48608|c0_g1, TR47496|c1_g1, TR54855|c5_g7, TR38468|c0_g1, TR47816|c0_g1, TR54433|c0_g1, TR50795|c0_g2, TR52757|c1_g1, TR36476|c0_g1
5	GO:0035639	purine ribonucleoside triphosphate binding	Molecular Function	GO:1901265	nucleoside phosphate binding	17.6	11	TR47496|c1_g1, TR13193|c3_g1, TR54855|c5_g7, TR47968|c0_g1, TR38468|c0_g1, TR47816|c0_g1, TR54433|c0_g1, TR50795|c0_g2, TR48608|c0_g1, TR52757|c1_g1, TR36476|c0_g1
6	GO:0032550	purine ribonucleoside binding	Molecular Function	GO:0001883, GO:0032549	purine nucleoside binding, ribonucleoside binding	19.2	12	TR13193|c3_g1, TR47968|c0_g1, TR54866|c8_g1, TR48608|c0_g1, TR47496|c1_g1, TR54855|c5_g7, TR38468|c0_g1, TR47816|c0_g1, TR54433|c0_g1, TR50795|c0_g2, TR52757|c1_g1, TR36476|c0_g1
6	GO:0030554	adenyl nucleotide binding	Molecular Function	GO:0017076	purine nucleotide binding	23.52	12	TR13193|c3_g1, TR47968|c0_g1, TR54866|c8_g1, TR48608|c0_g1, TR47496|c1_g1, TR54855|c5_g7, TR38468|c0_g1, TR47816|c0_g1, TR54433|c0_g1, TR50795|c0_g2, TR52757|c1_g1, TR36476|c0_g1
6	GO:0032559	adenyl ribonucleotide binding	Molecular Function	GO:0032555, GO:0030554	purine ribonucleotide binding, adenyl nucleotide binding	19.2	12	TR13193|c3_g1, TR47968|c0_g1, TR54866|c8_g1, TR48608|c0_g1, TR47496|c1_g1, TR54855|c5_g7, TR38468|c0_g1, TR47816|c0_g1, TR54433|c0_g1, TR50795|c0_g2, TR52757|c1_g1, TR36476|c0_g1
6	GO:0005524	ATP binding	Molecular Function	GO:0032550, GO:0032559, GO:0035639	purine ribonucleoside binding, adenyl ribonucleotide binding, purine ribonucleoside triphosphate binding	11	11	TR47496|c1_g1, TR13193|c3_g1, TR54855|c5_g7, TR47968|c0_g1, TR38468|c0_g1, TR47816|c0_g1, TR54433|c0_g1, TR50795|c0_g2, TR48608|c0_g1, TR52757|c1_g1, TR36476|c0_g1

## Sheet: Table S6
Table S6. Cellular component based characterisation of genes differentially expressed across both grapefruit varieties.
Level	GO ID	GO Name	GO Type	Parents (ACC)	Parents (Name)	Nodescore	#Seqs	Sequence Names
1	GO:0005575	cellular_component	Cellular Component			33.09	14	TR51076|c1_g1, TR13193|c3_g1, TR49183|c0_g2, TR51756|c3_g2, TR48391|c0_g1, TR51523|c0_g2, TR49186|c0_g1, TR48608|c0_g1, TR53335|c0_g1, TR53066|c0_g2, TR28527|c0_g1, TR35462|c0_g1, TR54433|c0_g1, TR50795|c0_g2
2	GO:0016020	membrane	Cellular Component	GO:0005575	cellular_component	19.78	12	TR53335|c0_g1, TR51076|c1_g1, TR53066|c0_g2, TR28527|c0_g1, TR51756|c3_g2, TR35462|c0_g1, TR48391|c0_g1, TR54433|c0_g1, TR50795|c0_g2, TR51523|c0_g2, TR49186|c0_g1, TR48608|c0_g1
2	GO:0044425	membrane part	Cellular Component	GO:0016020, GO:0005575	membrane, cellular_component	12.34	6	TR53335|c0_g1, TR28527|c0_g1, TR35462|c0_g1, TR48391|c0_g1, TR50795|c0_g2, TR51523|c0_g2
2	GO:0044464	cell part	Cellular Component	GO:0005623, GO:0005575	cell, cellular_component	5.23	2	TR49183|c0_g2, TR51523|c0_g2
2	GO:0005623	cell	Cellular Component	GO:0005575	cellular_component	3.52	2	TR49183|c0_g2, TR51523|c0_g2
2	GO:0032991	macromolecular complex	Cellular Component	GO:0005575	cellular_component	2.74	1	TR51523|c0_g2
2	GO:0019012	virion	Cellular Component	GO:0005575	cellular_component	1	1	TR13193|c3_g1
3	GO:0031224	intrinsic component of membrane	Cellular Component	GO:0044425	membrane part	8	5	TR53335|c0_g1, TR28527|c0_g1, TR35462|c0_g1, TR48391|c0_g1, TR50795|c0_g2
3	GO:0044424	intracellular part	Cellular Component	GO:0044464, GO:0005622	cell part, intracellular	4.14	2	TR49183|c0_g2, TR51523|c0_g2
3	GO:0005622	intracellular	Cellular Component	GO:0044464	cell part	2.48	2	TR49183|c0_g2, TR51523|c0_g2
3	GO:0043234	protein complex	Cellular Component	GO:0032991	macromolecular complex	2.9	1	TR51523|c0_g2
3	GO:0034357	photosynthetic membrane	Cellular Component	GO:0016020, GO:0044436, GO:0009579	membrane, thylakoid part, thylakoid	1.32	1	TR51523|c0_g2
3	GO:1990204	oxidoreductase complex	Cellular Component	GO:1902494, GO:0044464, GO:0005623	catalytic complex, cell part, cell	1.6	1	TR51523|c0_g2
3	GO:0019898	extrinsic component of membrane	Cellular Component	GO:0044425	membrane part	1	1	TR51523|c0_g2
3	GO:0098796	membrane protein complex	Cellular Component	GO:0016020, GO:0043234, GO:0044425	membrane, protein complex, membrane part	1.56	1	TR51523|c0_g2
4	GO:0016021	integral component of membrane	Cellular Component	GO:0031224	intrinsic component of membrane	5	5	TR53335|c0_g1, TR28527|c0_g1, TR35462|c0_g1, TR48391|c0_g1, TR50795|c0_g2
4	GO:0044436	thylakoid part	Cellular Component	GO:0009579, GO:0044424	thylakoid, intracellular part	2.56	1	TR51523|c0_g2
4	GO:0009579	thylakoid	Cellular Component	GO:0044424	intracellular part	1.54	1	TR51523|c0_g2
4	GO:0009654	photosystem II oxygen evolving complex	Cellular Component	GO:0044436, GO:0042651, GO:0009523, GO:1990204, GO:0098796	thylakoid part, thylakoid membrane, photosystem II, oxidoreductase complex, membrane protein complex	1	1	TR51523|c0_g2
4	GO:1902494	catalytic complex	Cellular Component	GO:0043234	protein complex	1.96	1	TR51523|c0_g2
4	GO:0042651	thylakoid membrane	Cellular Component	GO:0034357	photosynthetic membrane	0.6	1	TR51523|c0_g2
4	GO:0005737	cytoplasm	Cellular Component	GO:0044424	intracellular part	1	1	TR49183|c0_g2
4	GO:0009521	photosystem	Cellular Component	GO:0044436, GO:0034357, GO:0098796	thylakoid part, photosynthetic membrane, membrane protein complex	1.96	1	TR51523|c0_g2
5	GO:0009523	photosystem II	Cellular Component	GO:0009521	photosystem	1.6	1	TR51523|c0_g2
